# Supplementary material for: Calpain 2 promotes Lenvatinib resistance and cancer stem cell traits via both proteolysis-dependent and independent approach in hepatocellular carcinoma
Source: PubMed Central journal article supplement (PMC11688263; doi:10.1186/s43556-024-00242-7), 2024-12-31

Fig. 1e

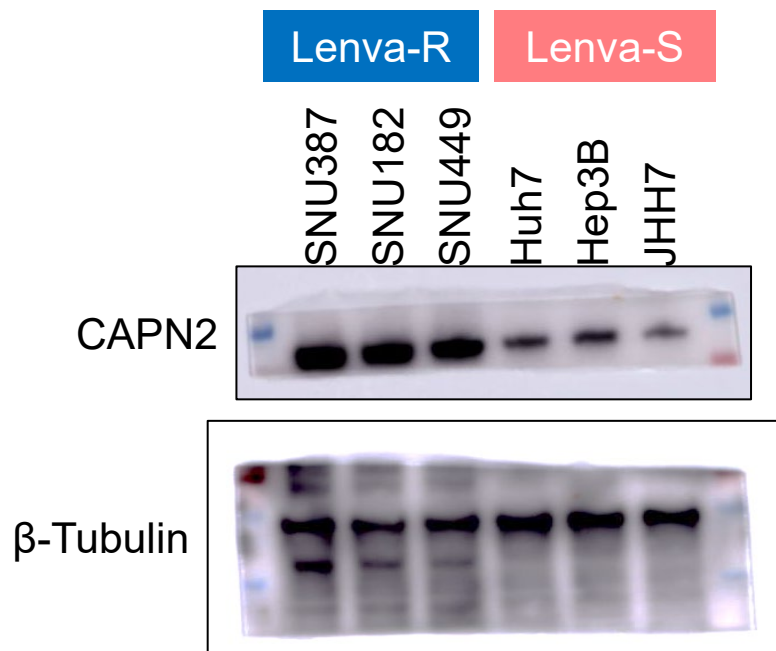

Fig. 1f

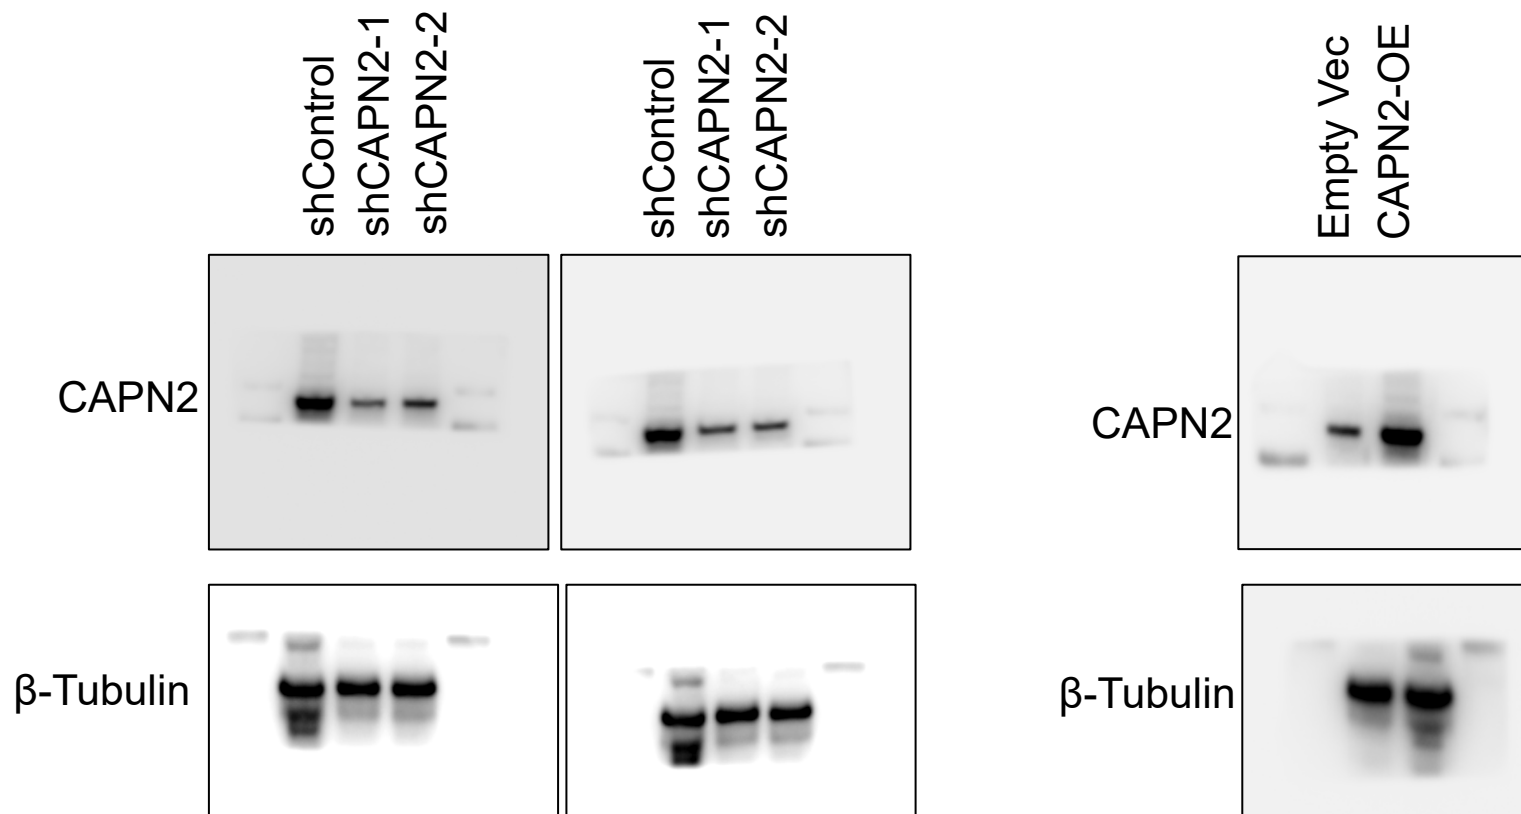

Fig. 7b

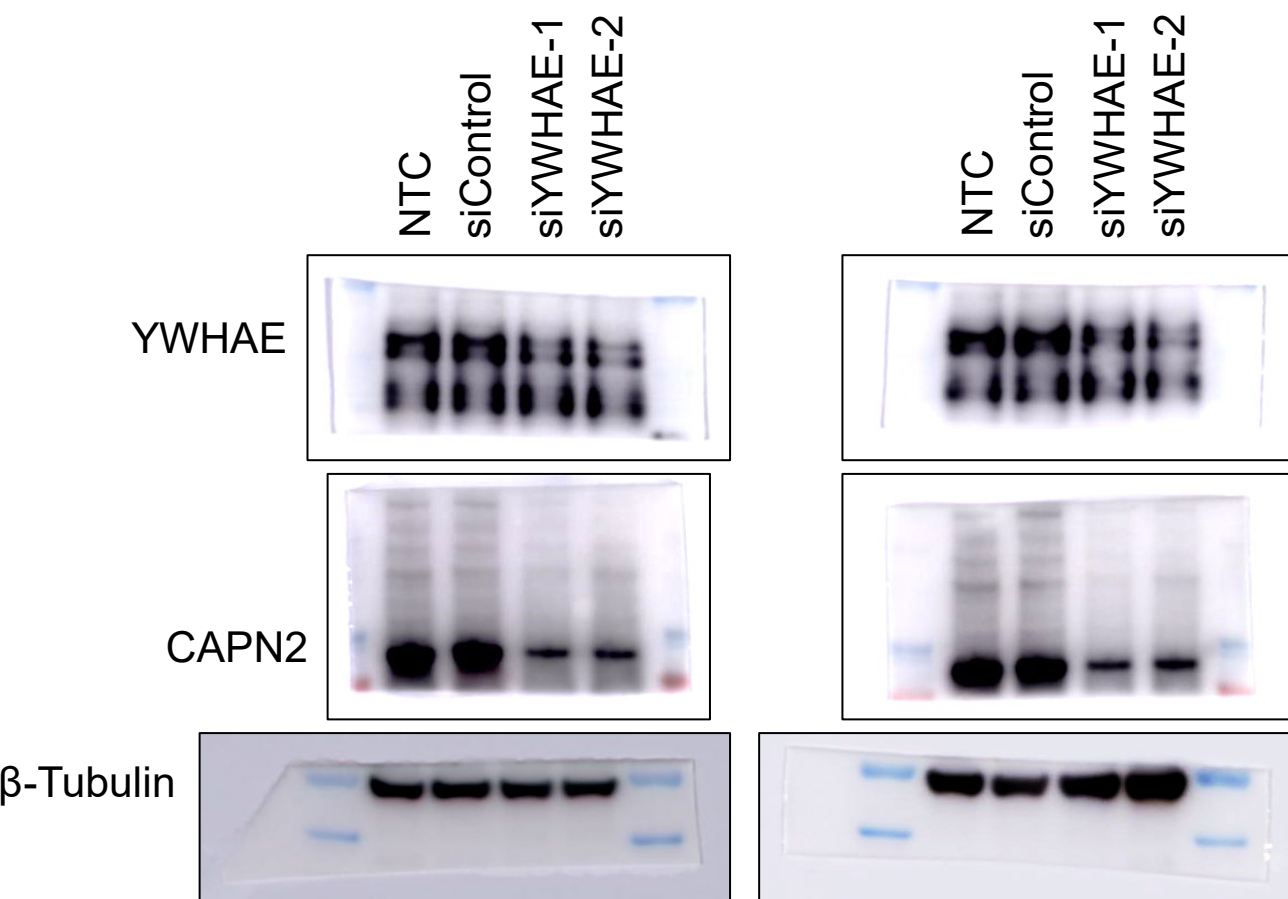

Fig. 1k

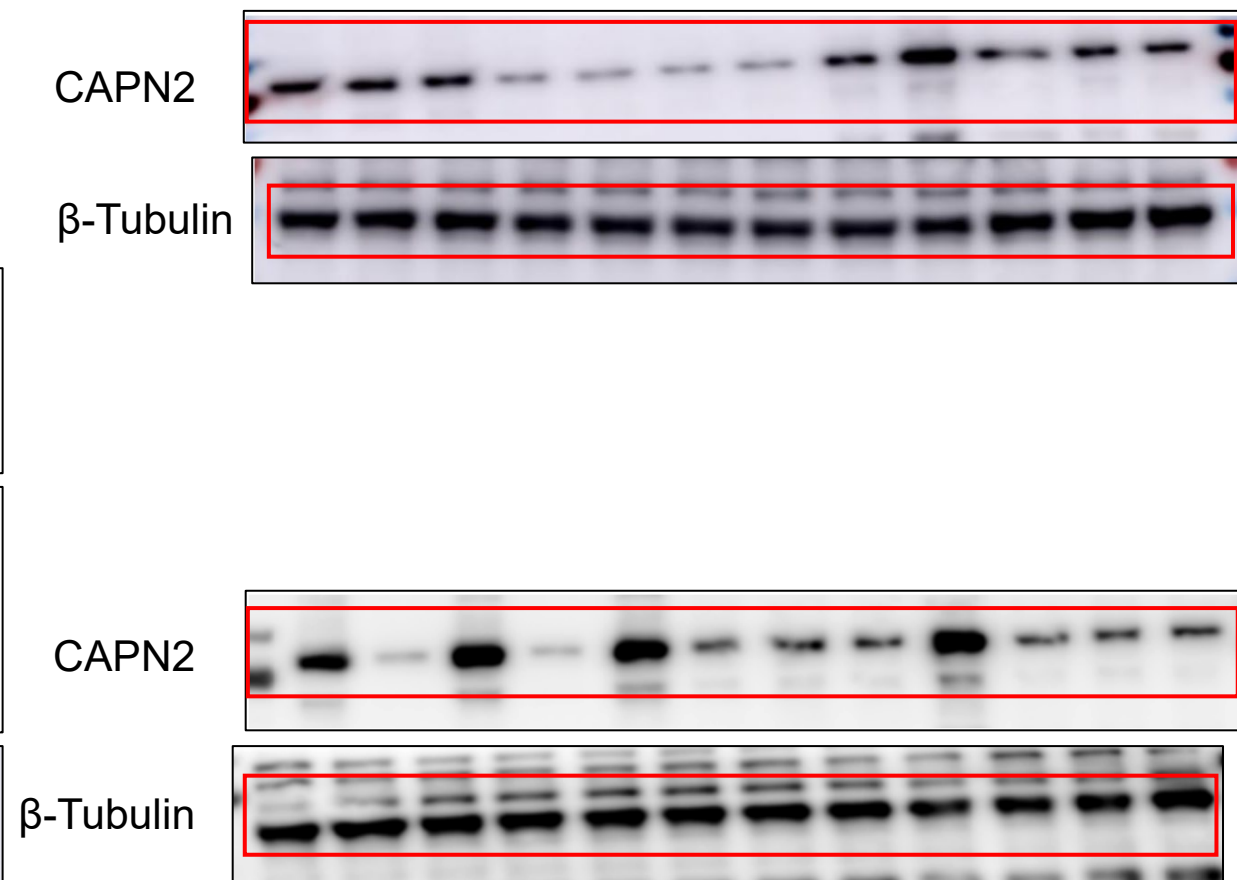



Fig. 2i

SNU387

| shControl |   |   |   | shCAPN2-1 |   |   |   | shCAPN2-2 |   |   |   |
|-----------|---|---|---|-----------|---|---|---|-----------|---|---|---|
| 0         | 2 | 3 | 4 | 0         | 2 | 3 | 4 | 0         | 2 | 3 | 4 |

CAPN2

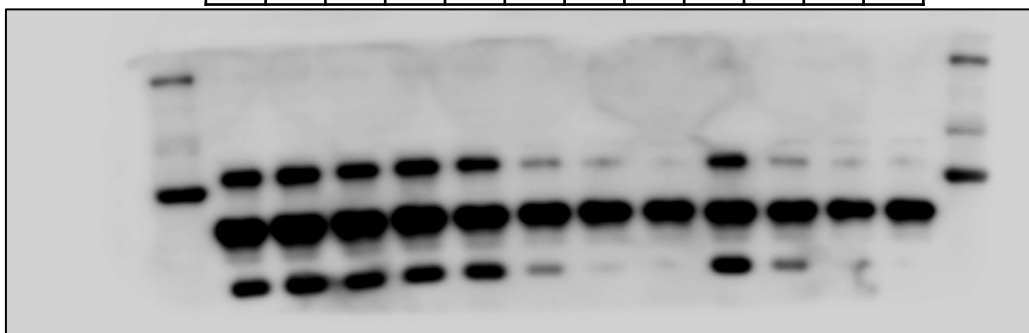

SOX9

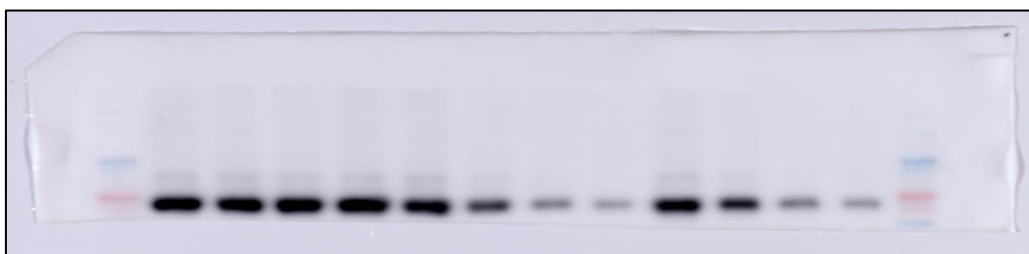

CD44

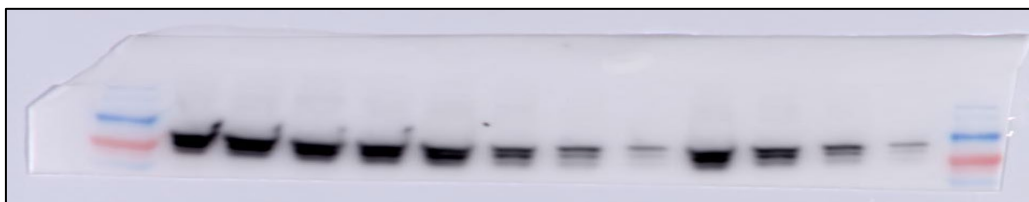

CK8

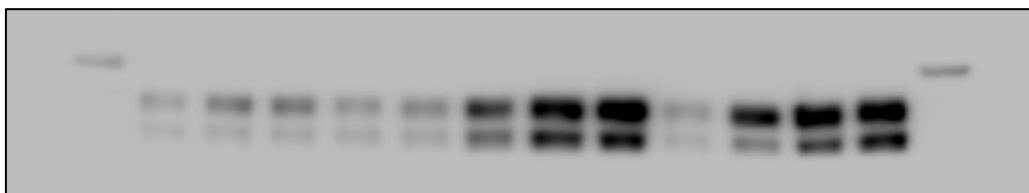

$\beta$ -Tubulin

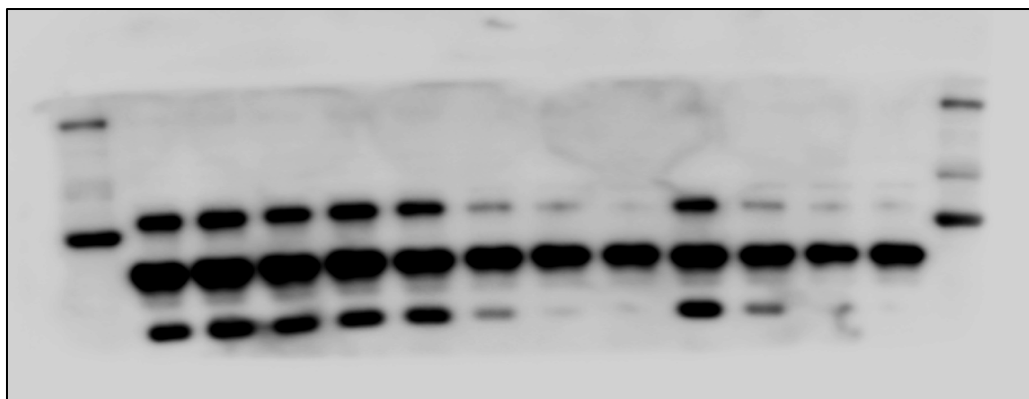

SNU182

| shControl |   |   |   | shCAPN2-1 |   |   |   | shCAPN2-2 |   |   |   |
|-----------|---|---|---|-----------|---|---|---|-----------|---|---|---|
| 0         | 2 | 3 | 4 | 0         | 2 | 3 | 4 | 0         | 2 | 3 | 4 |

CAPN2

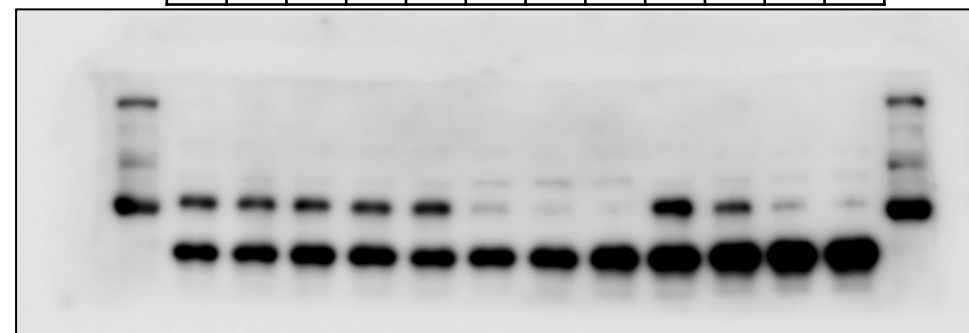

SOX9

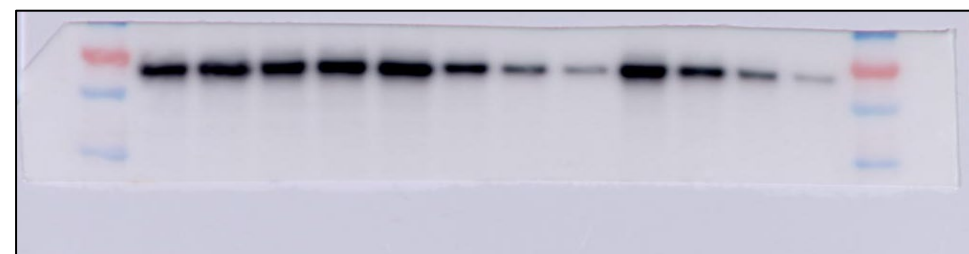

CD44

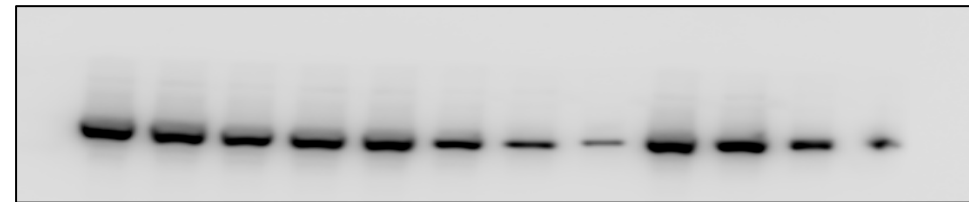

CK8

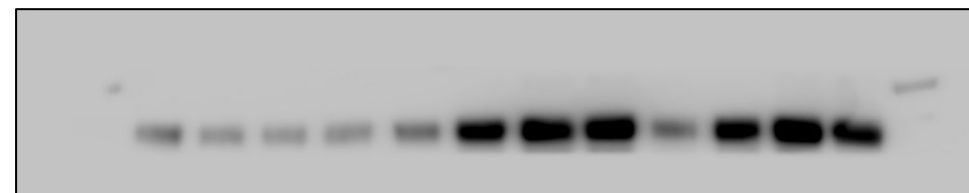

$\beta$ -Tubulin

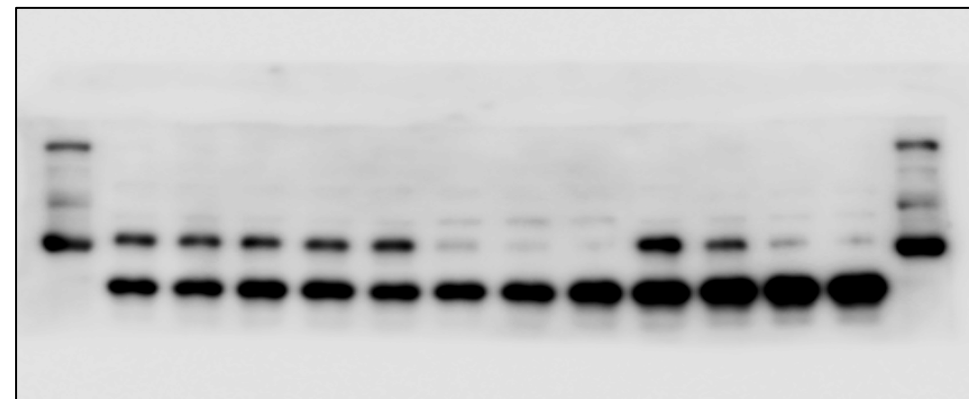

Fig. 2j

Clinical #1

| shControl |   |   |   | shCAPN2-1 |   |   |   | shCAPN2-2 |   |   |   |
|-----------|---|---|---|-----------|---|---|---|-----------|---|---|---|
| 0         | 2 | 3 | 4 | 0         | 2 | 3 | 4 | 0         | 2 | 3 | 4 |

CAPN2

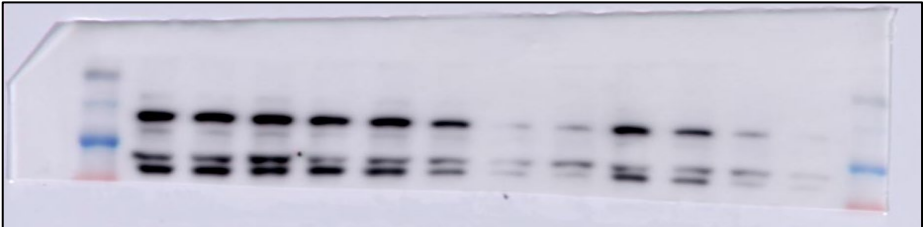

SOX9

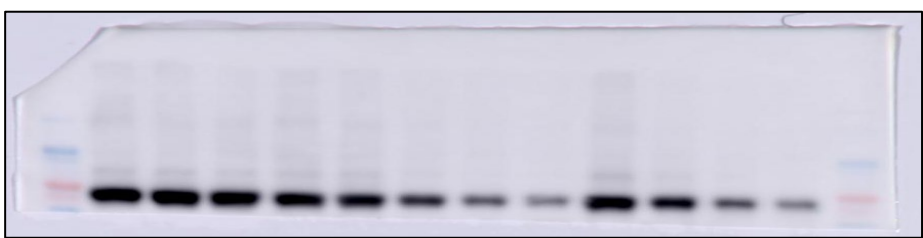

CD44

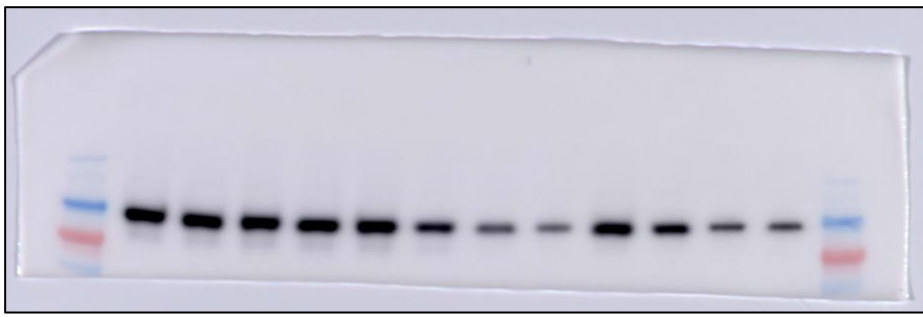

CK8

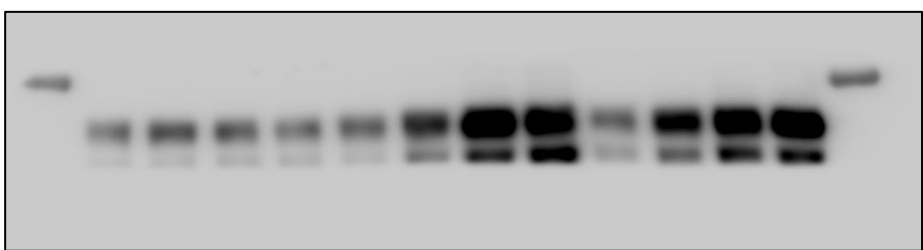

$\beta$ -Tubulin

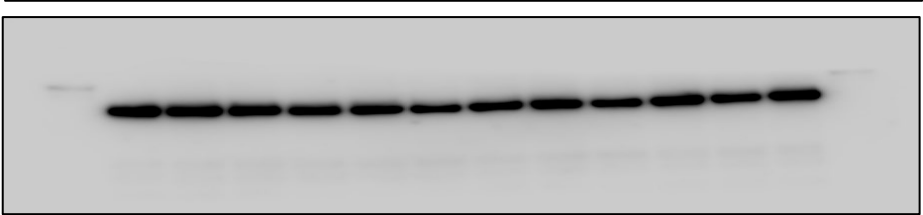

Clinical #2

| shControl |   |   |   | shCAPN2-1 |   |   |   | shCAPN2-2 |   |   |   |
|-----------|---|---|---|-----------|---|---|---|-----------|---|---|---|
| 0         | 2 | 3 | 4 | 0         | 2 | 3 | 4 | 0         | 2 | 3 | 4 |

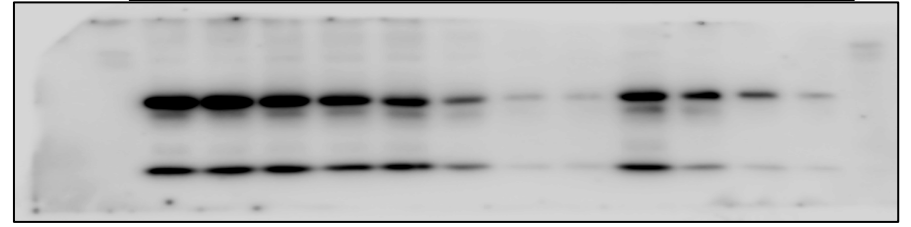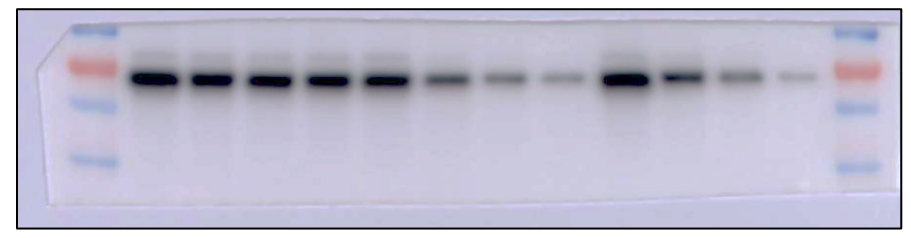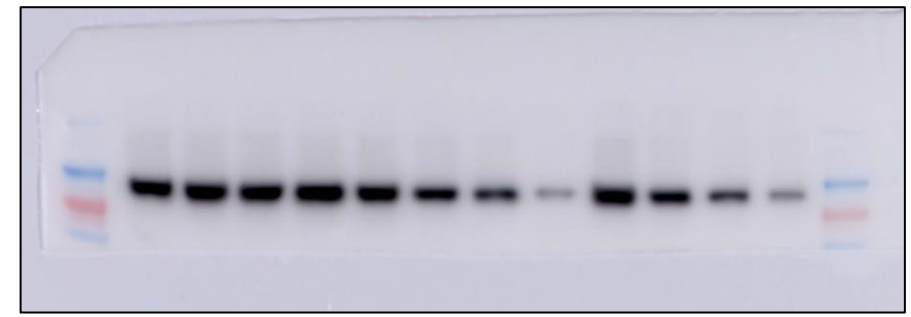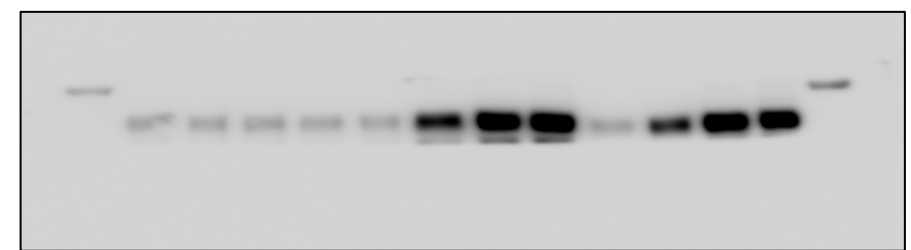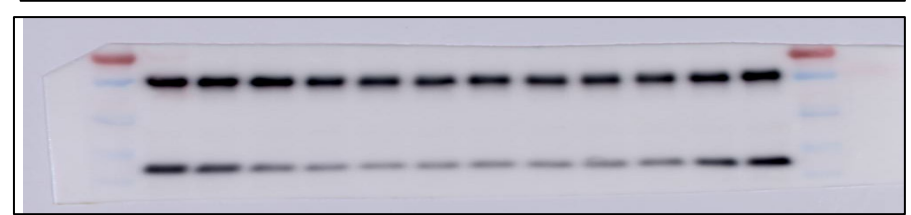



Fig. 3j

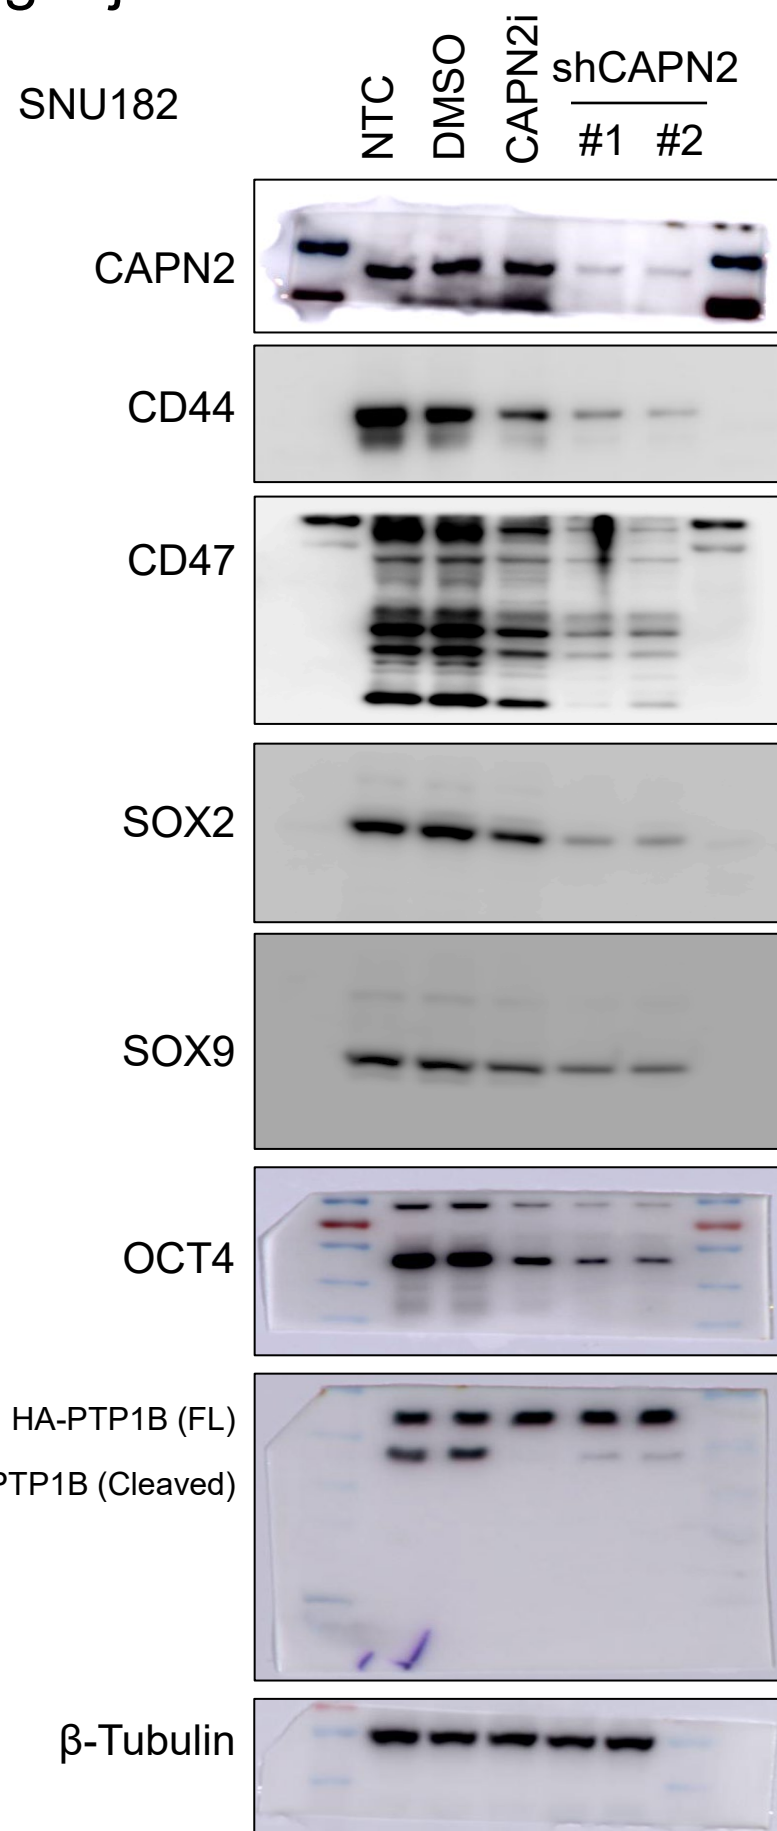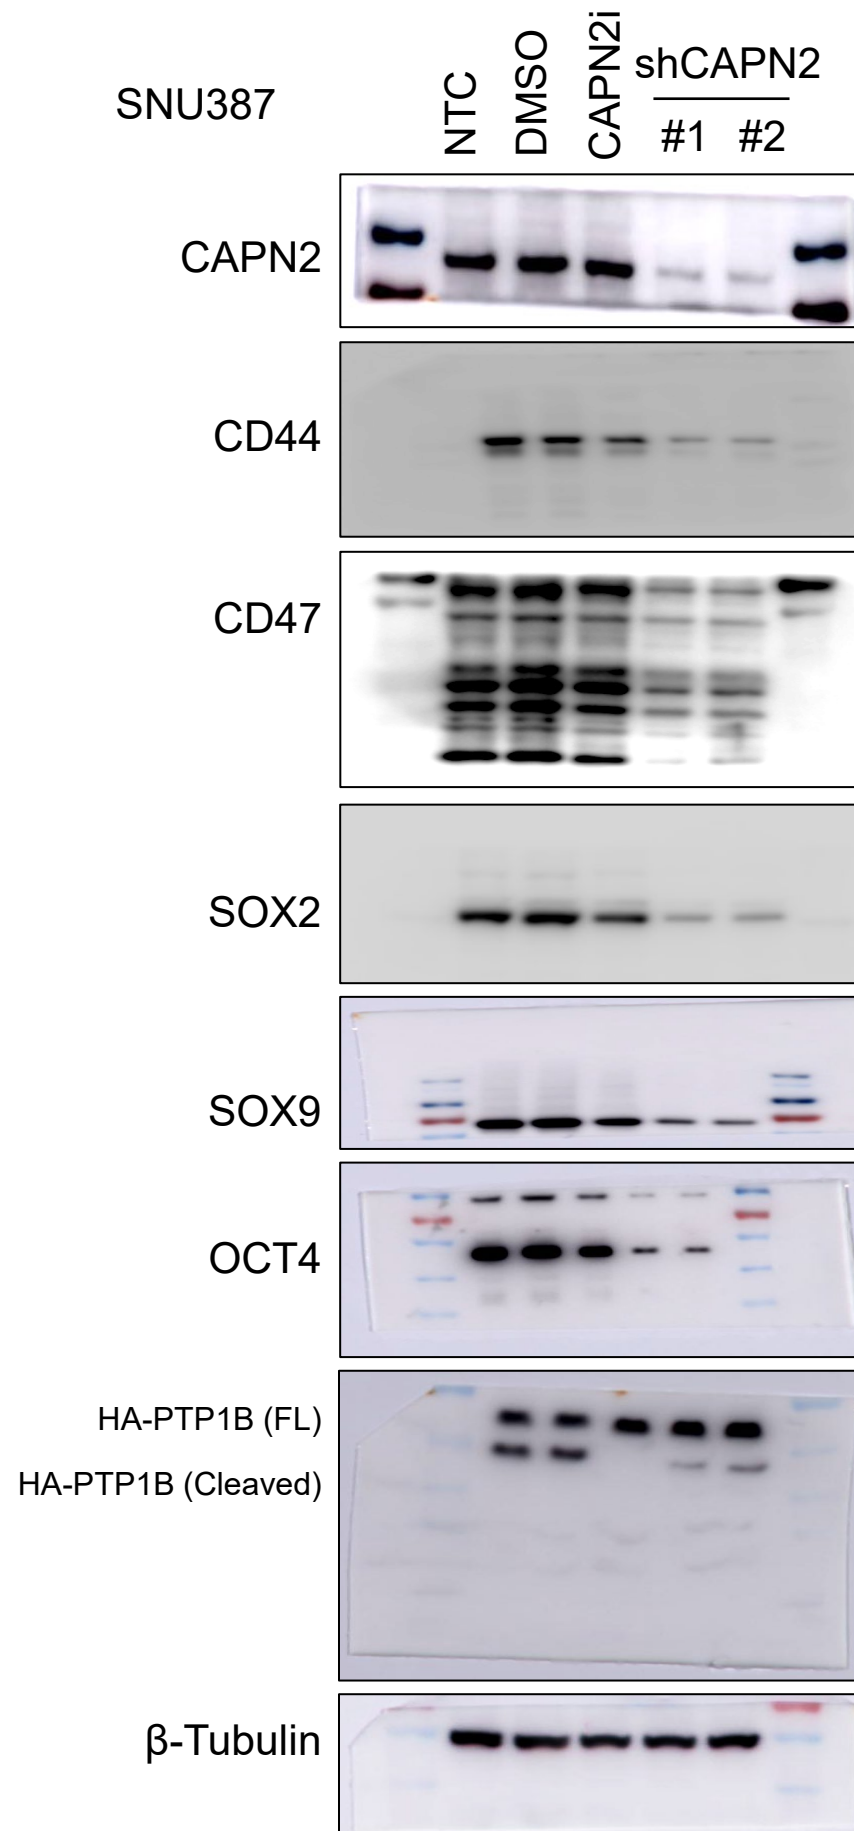

Fig. 4d

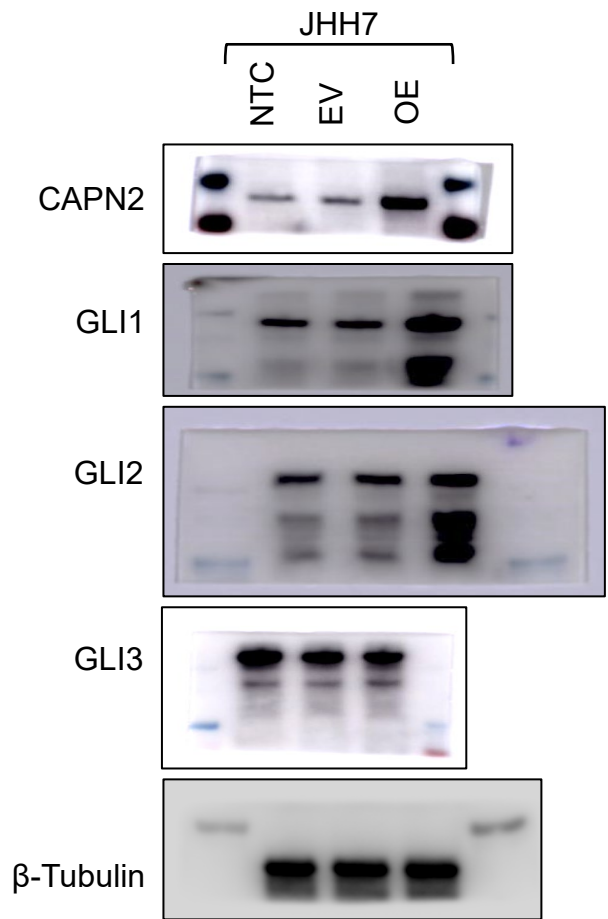

Fig. 4e

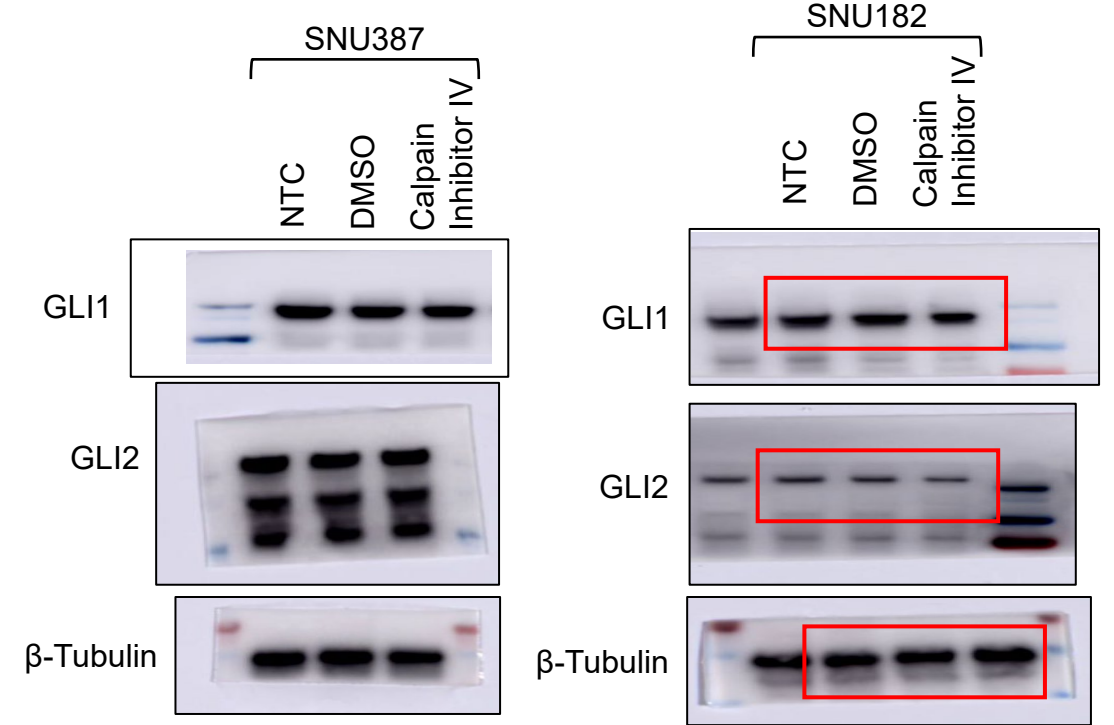

Fig. 4c

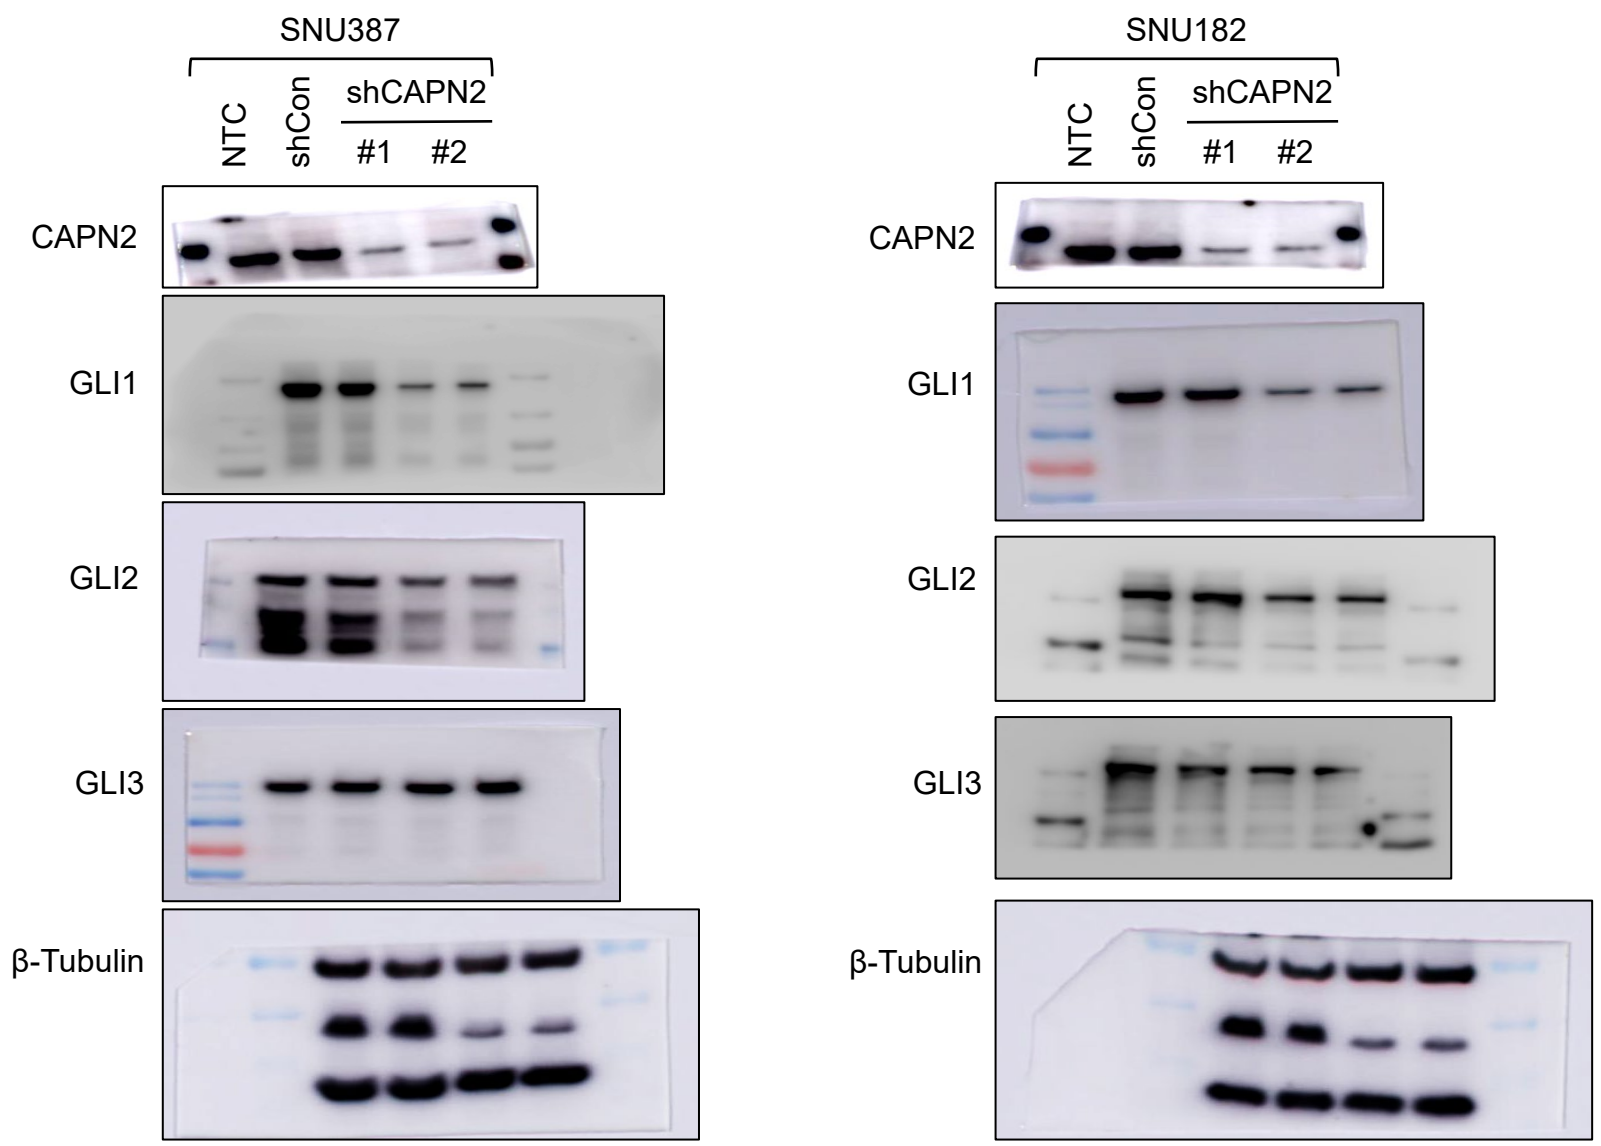

Fig. 4f

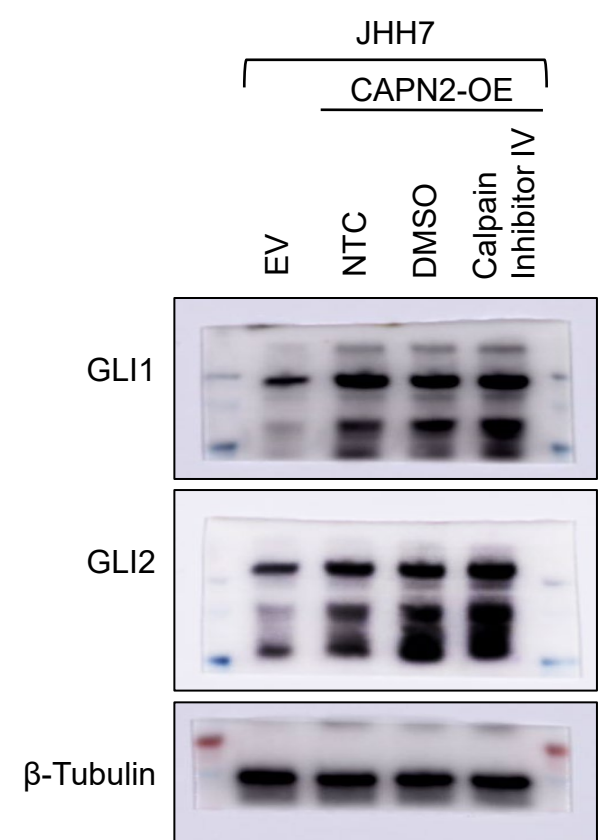

Fig. 4i

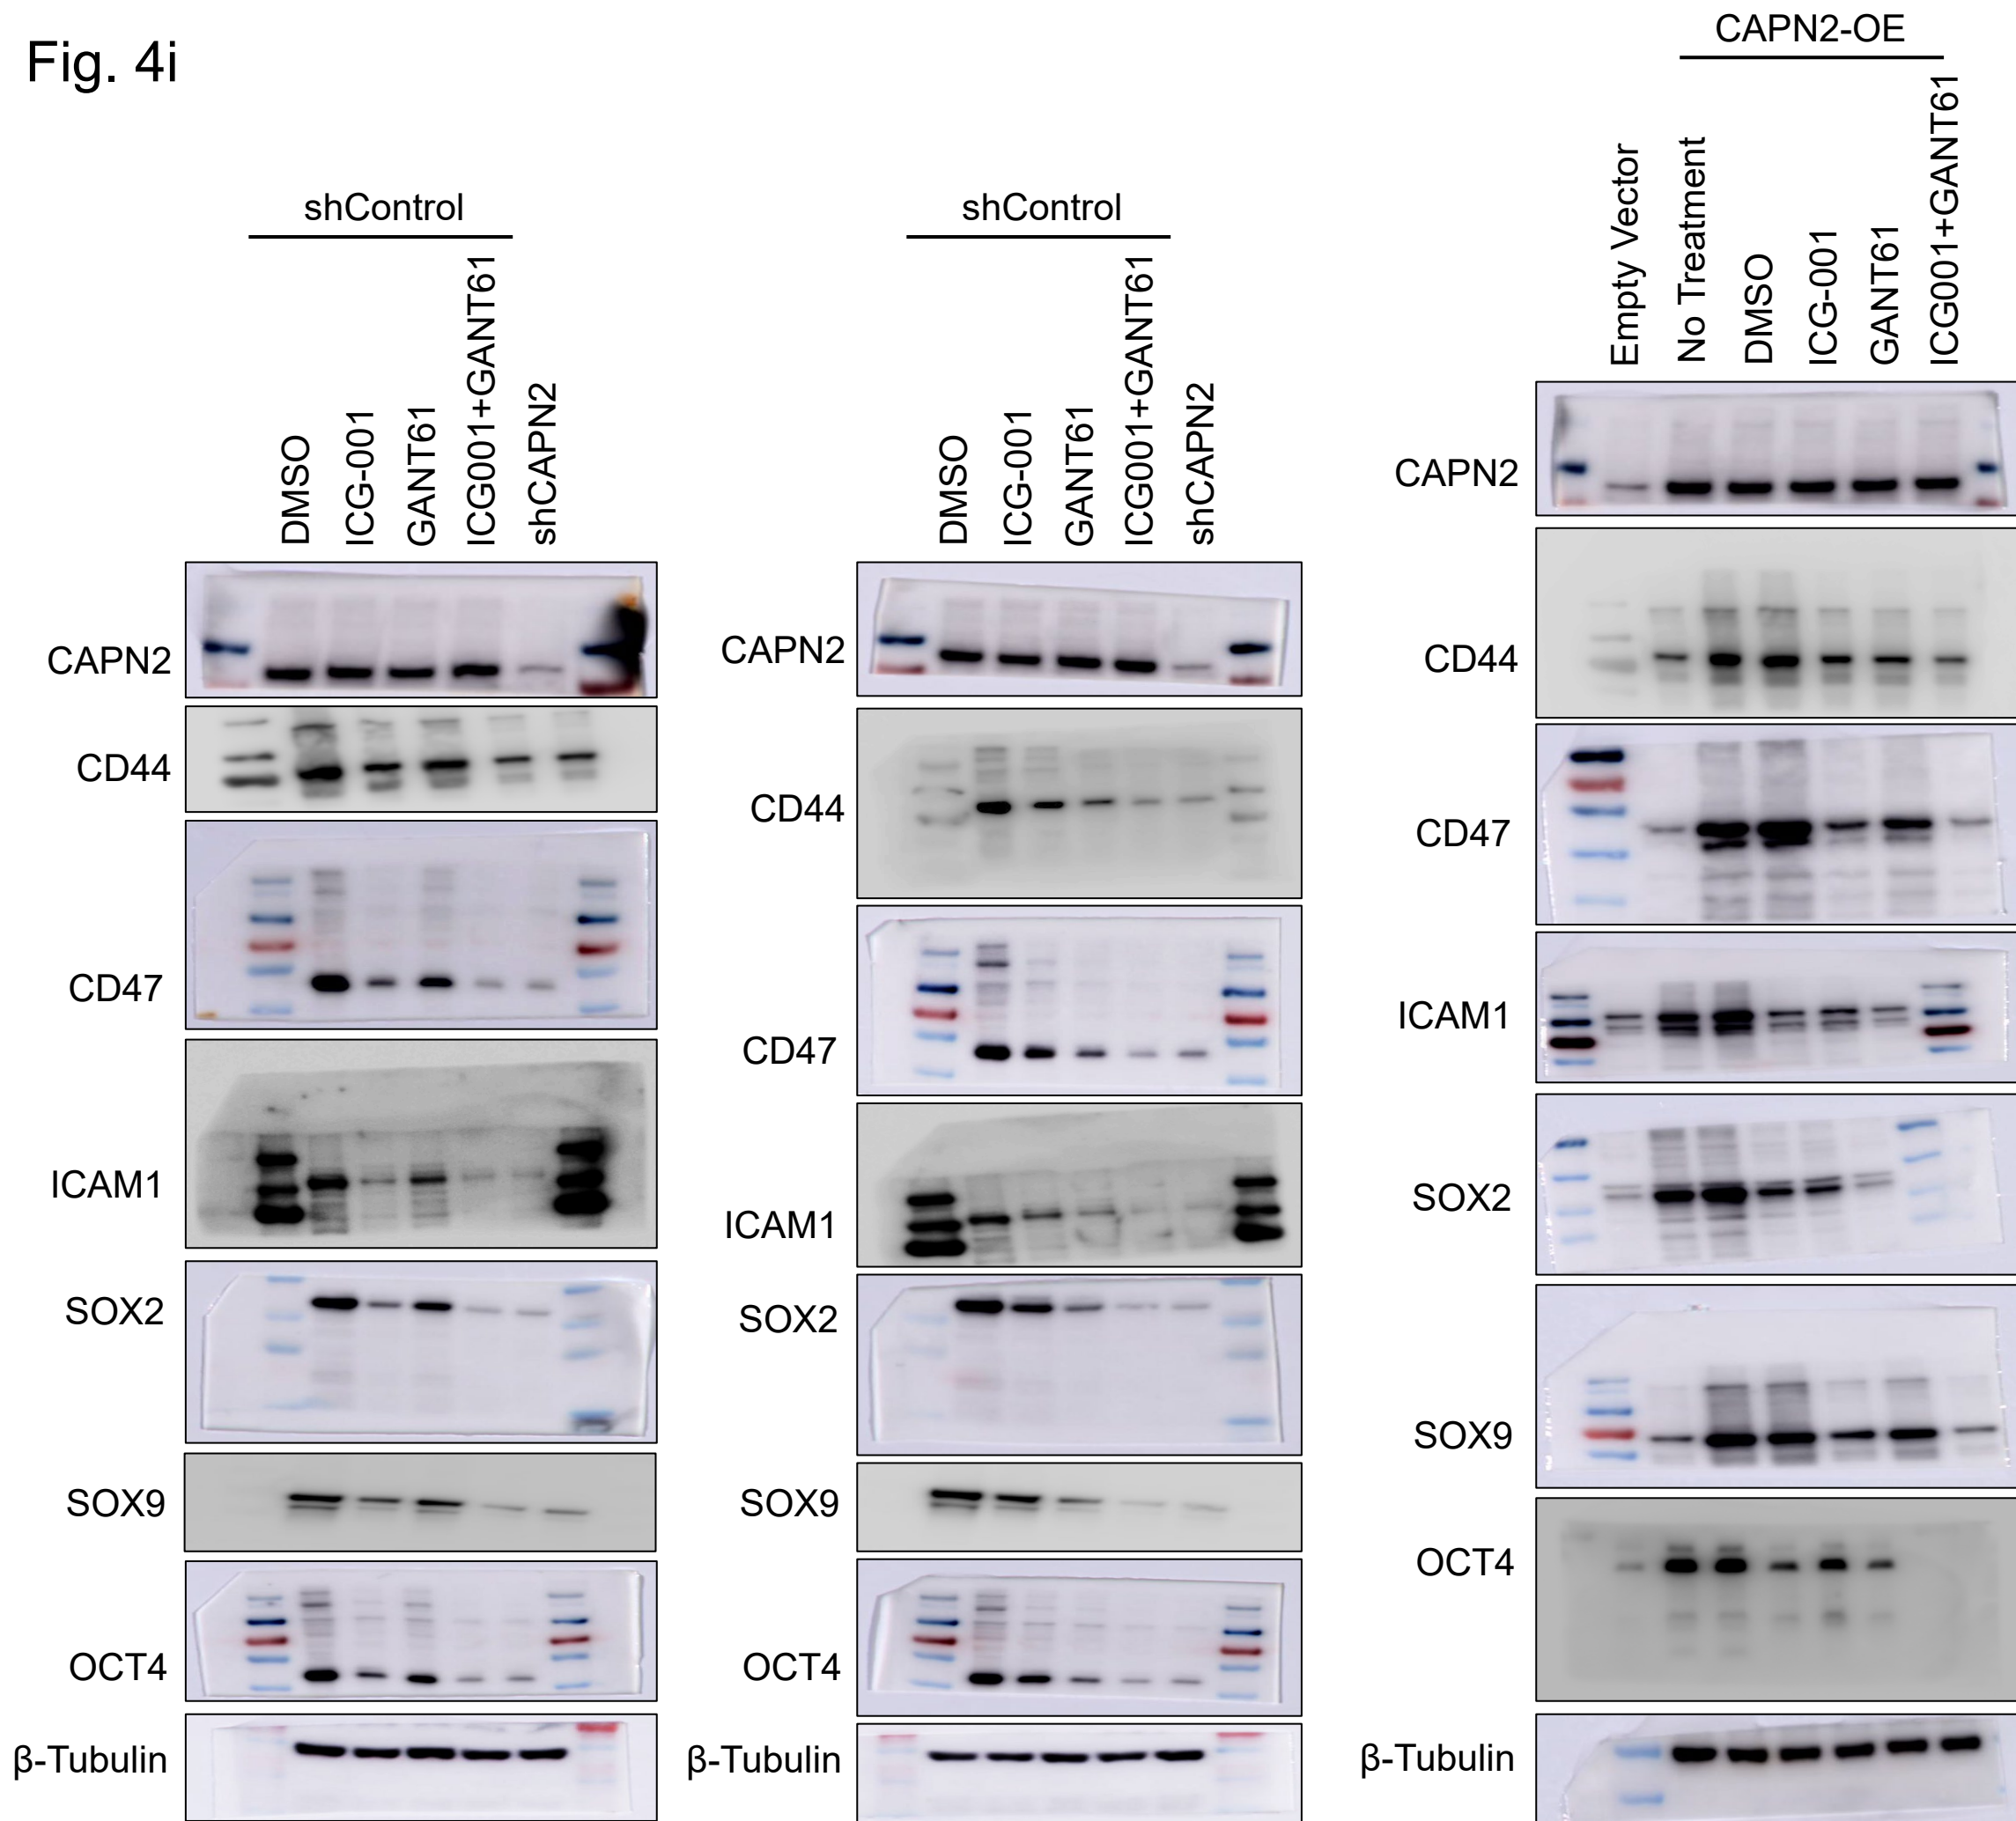



Fig. 5a

SNU387

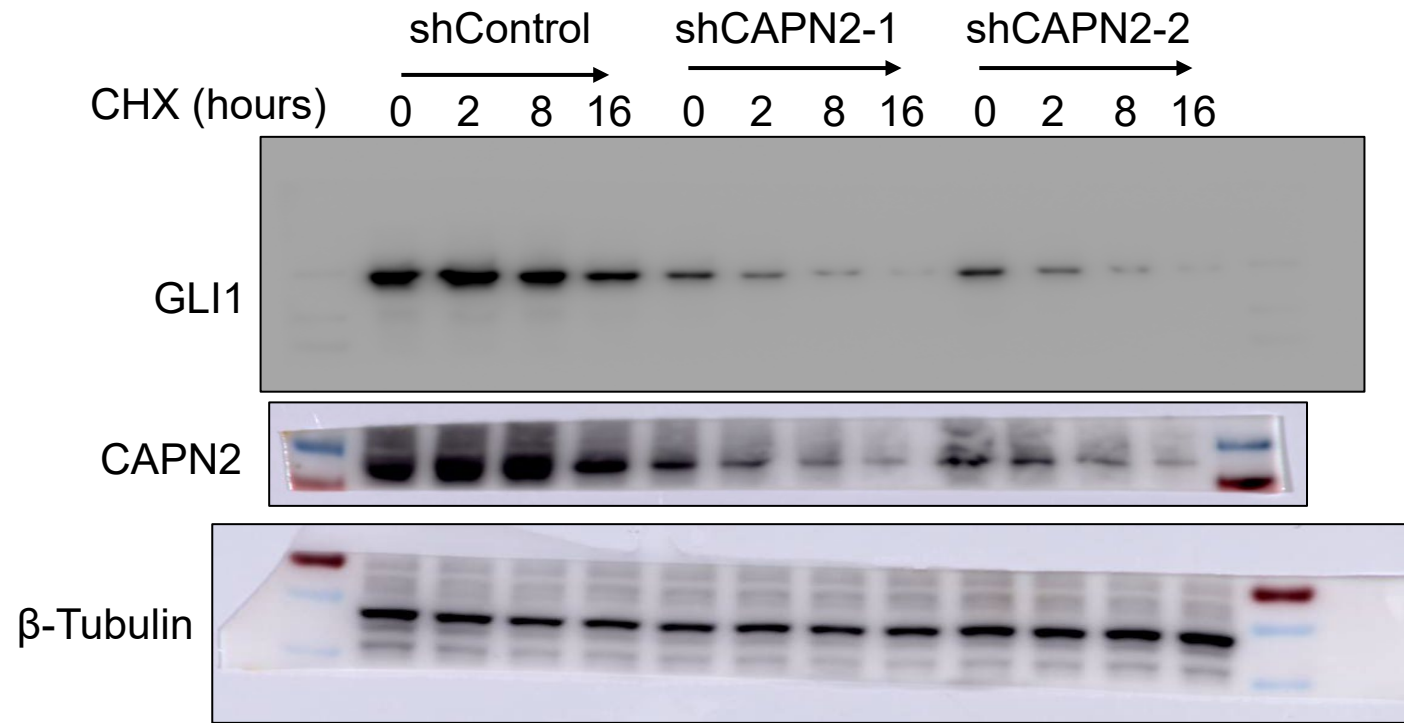

SNU182

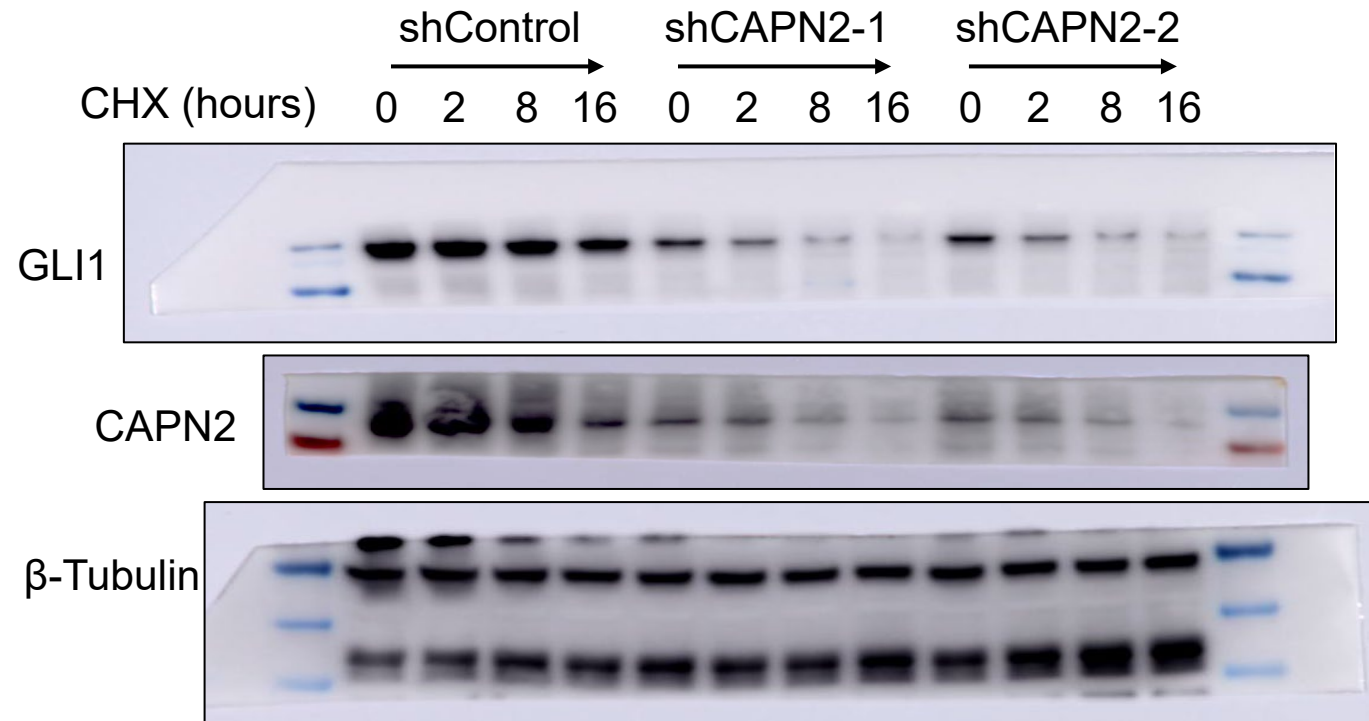

Fig. 5b

SNU387

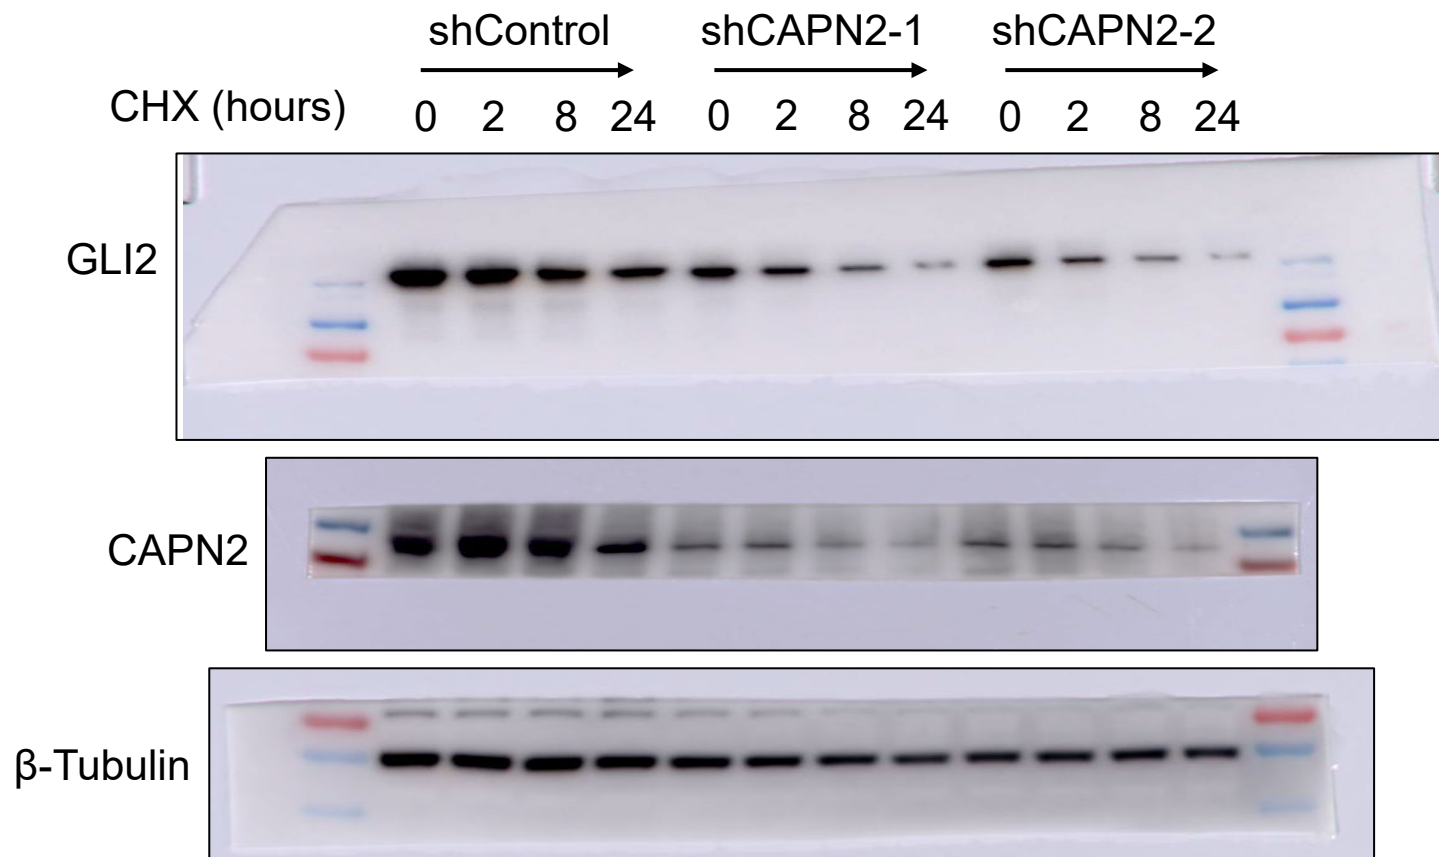

SNU182

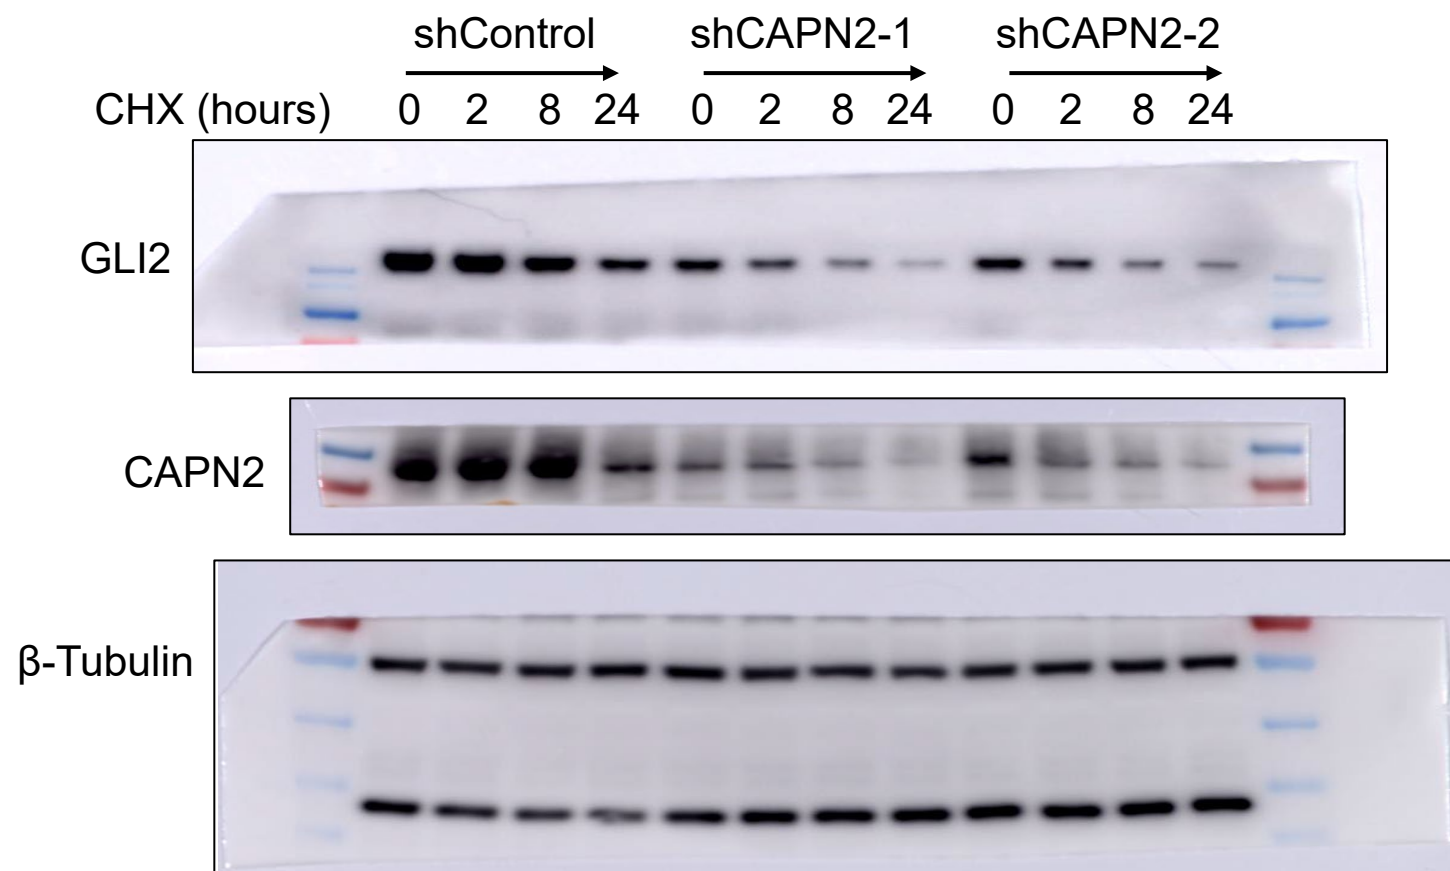

Fig. 5c

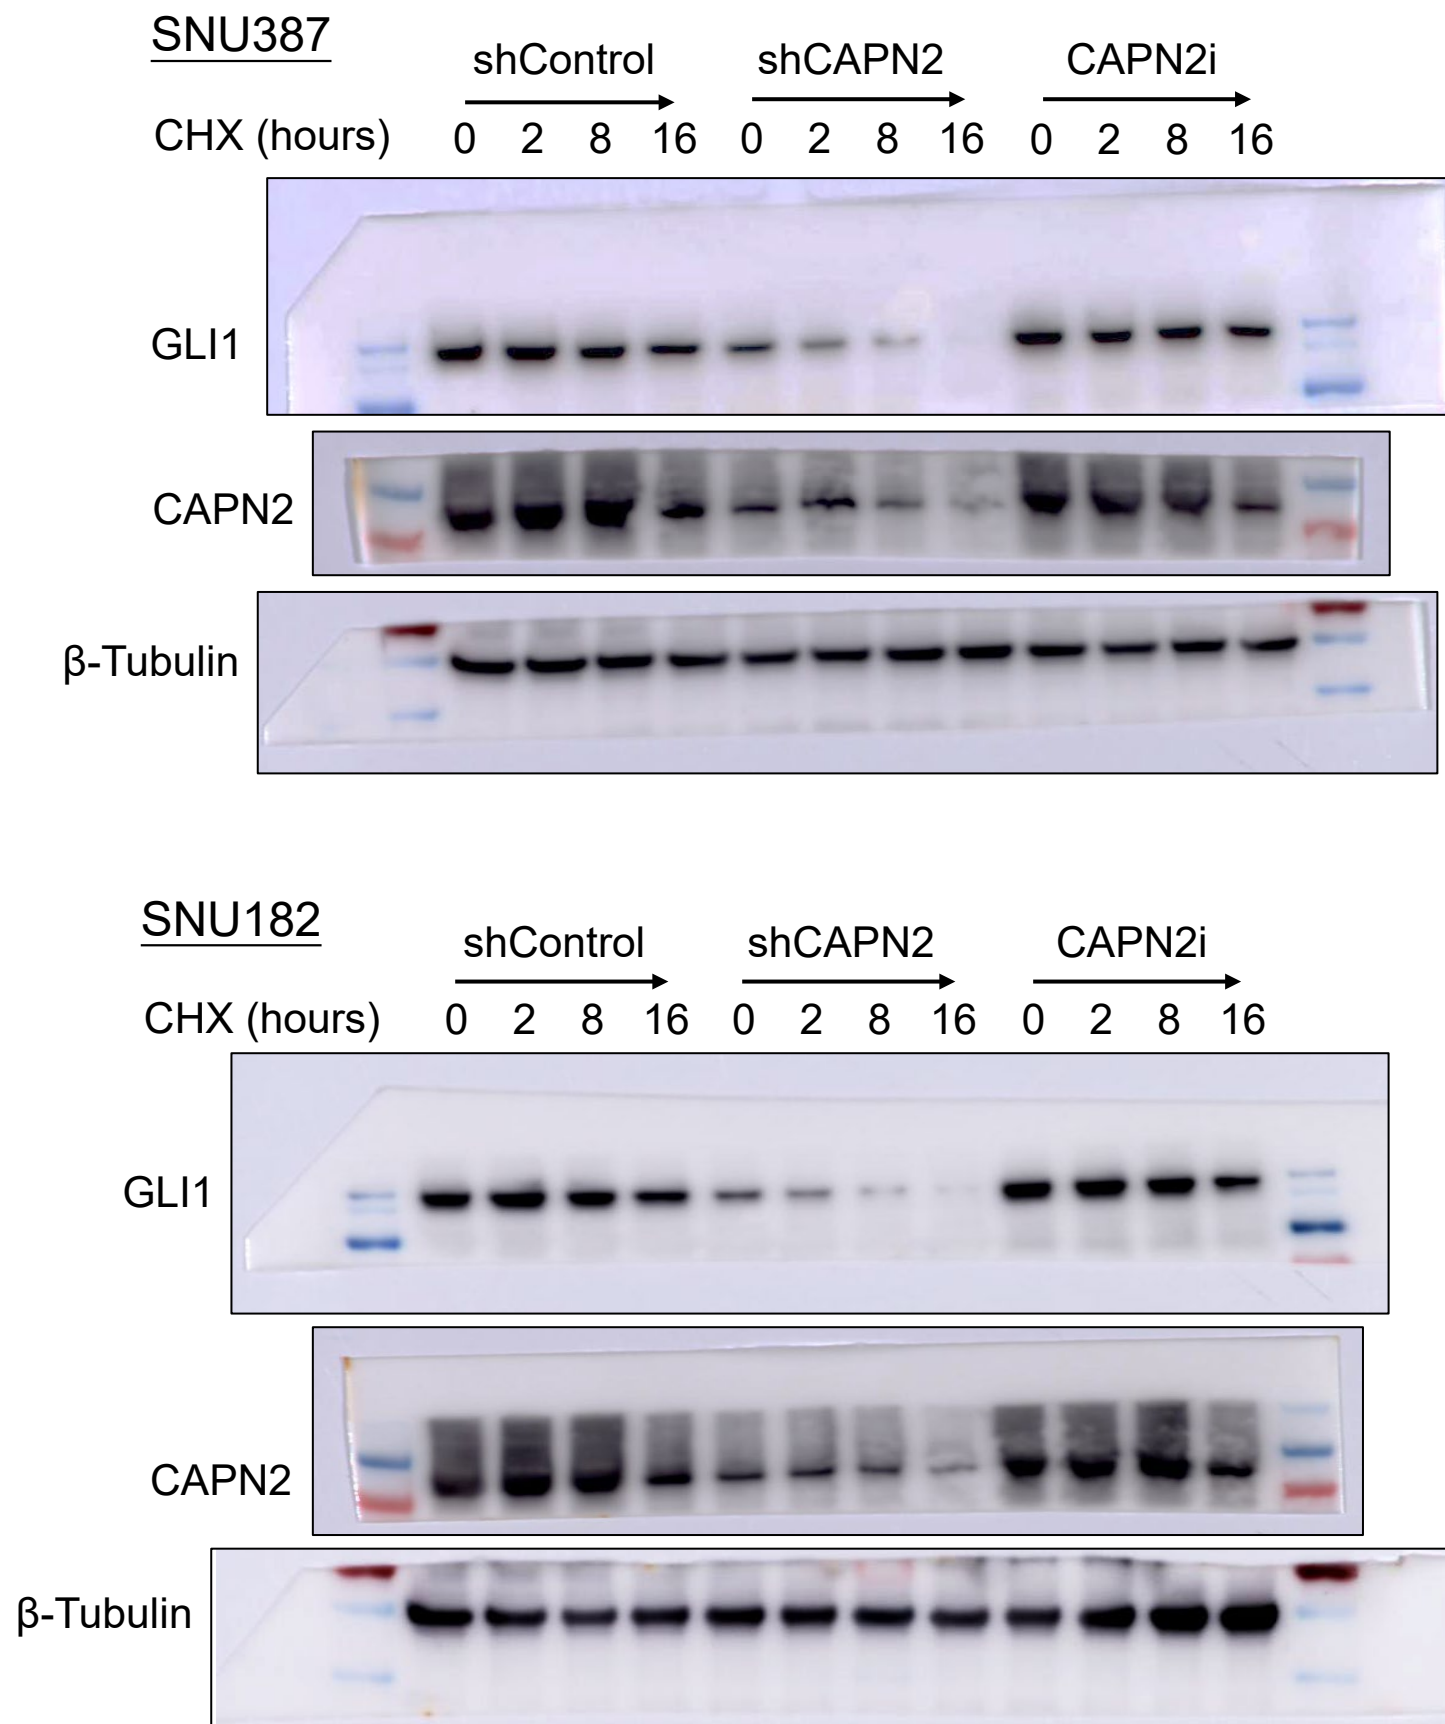

Fig. 5d

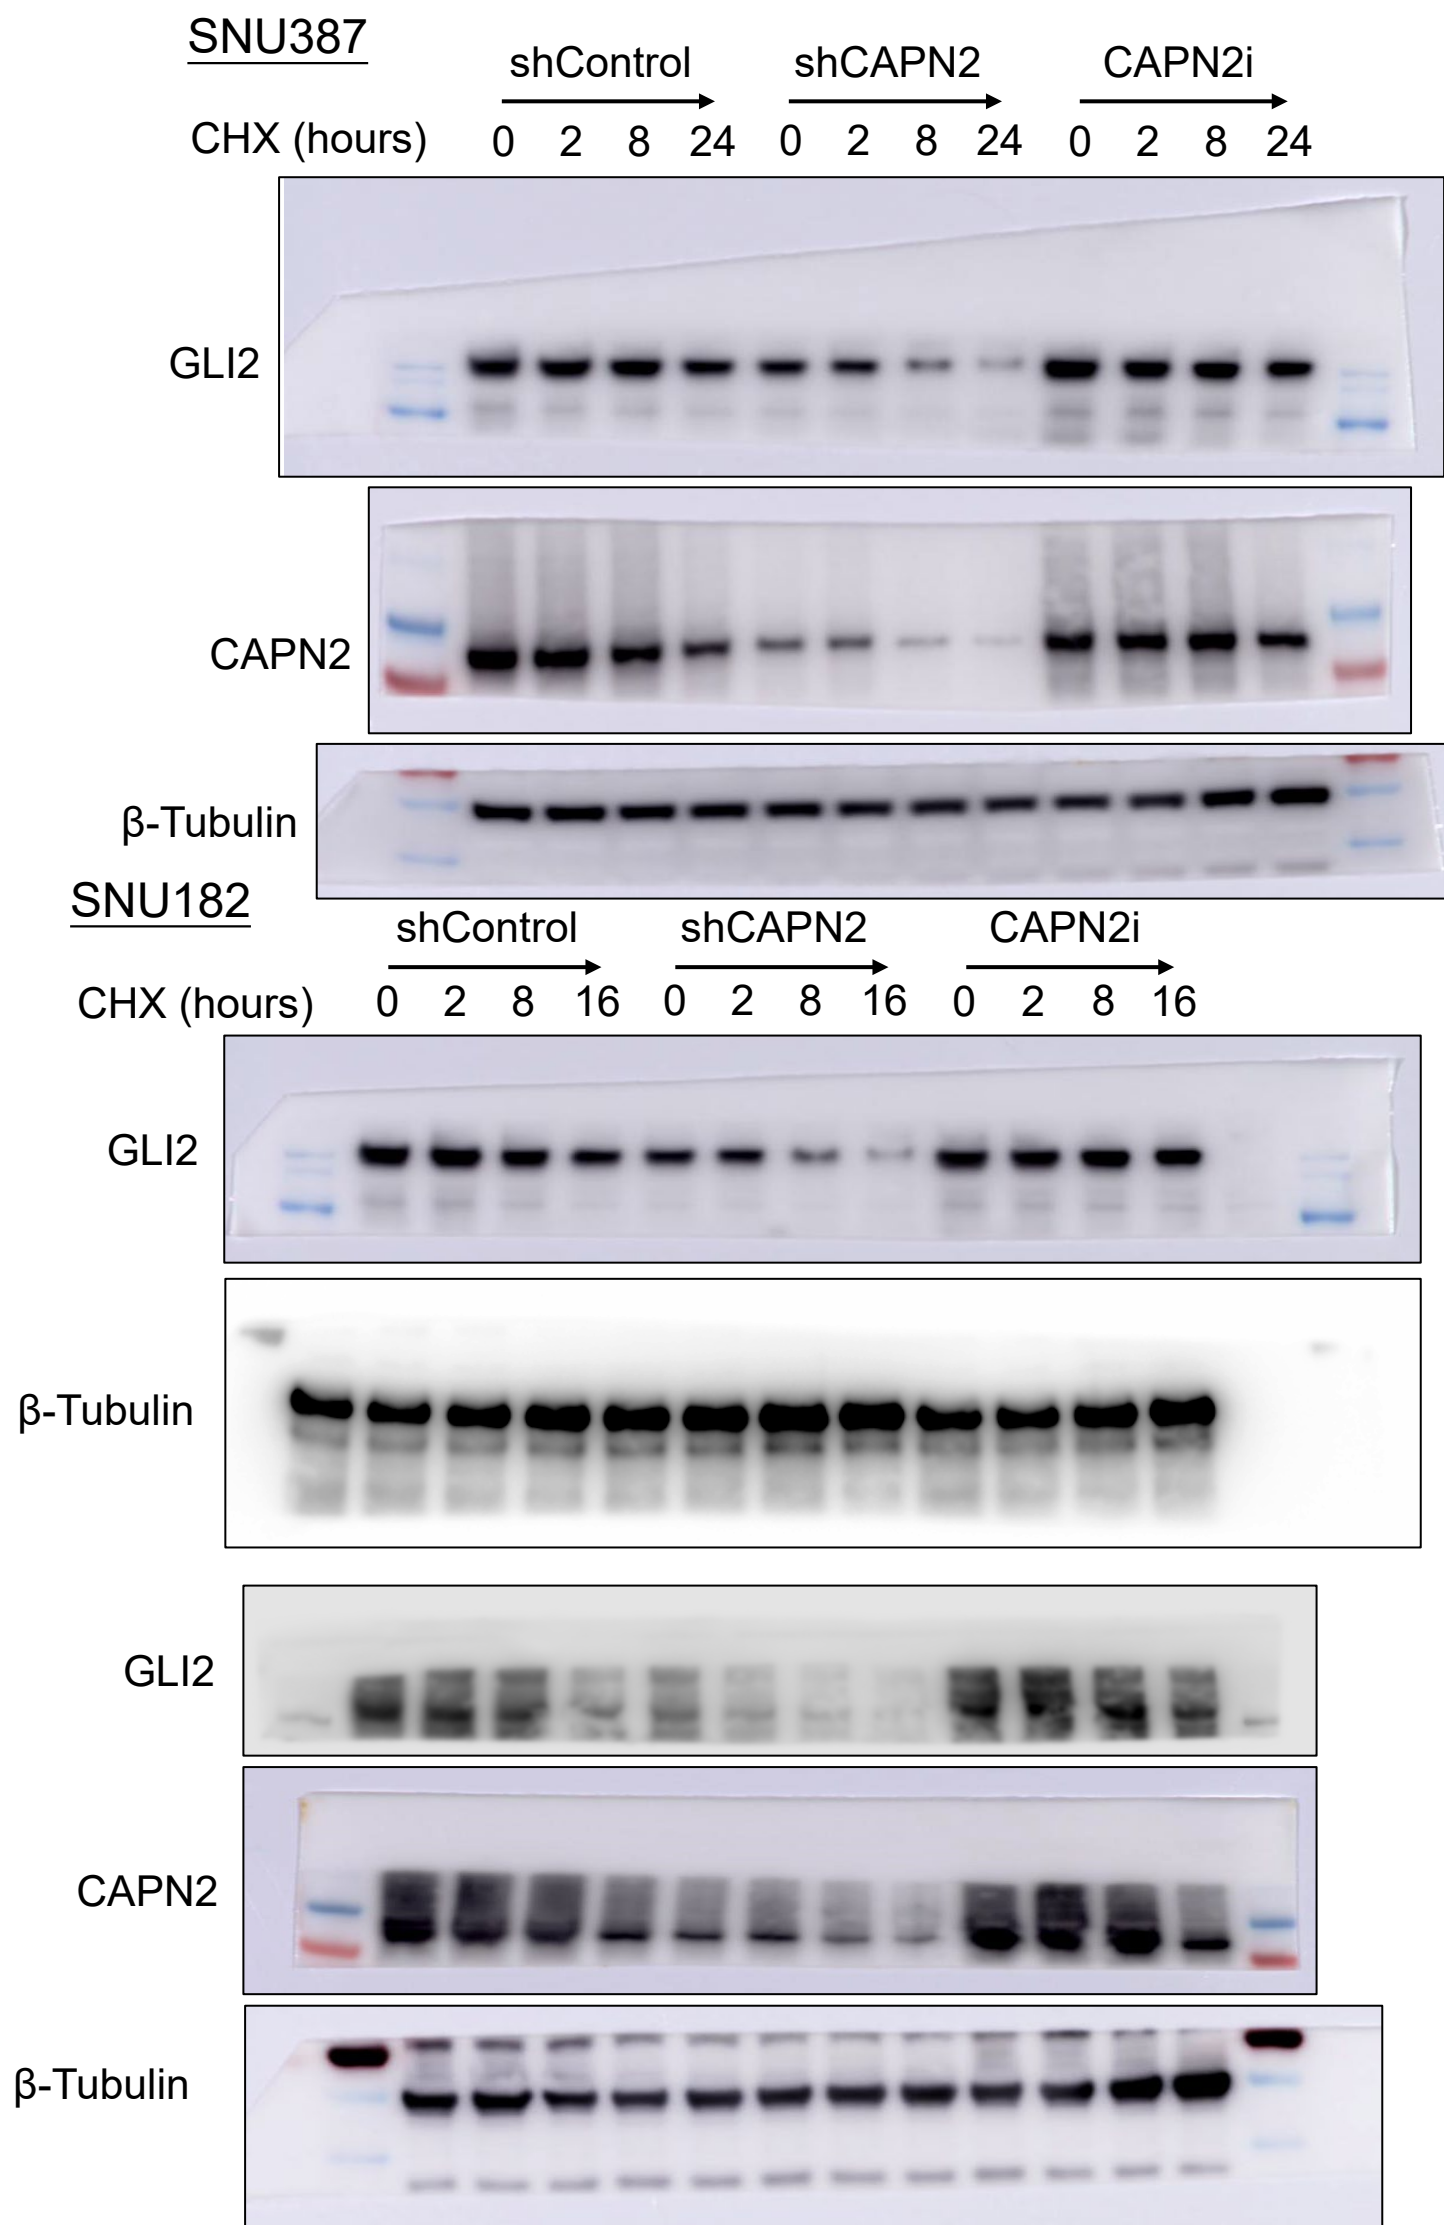

Fig. 5e

SNU387

SNU182

shCon + - - - -

+ - - - -

shCAPN2 - + + + +

- + + + +

DMSO - - + - -

- - + - -

MG132 - - - + -

- - - + -

BA - - - - +

- - - - +

GLI1

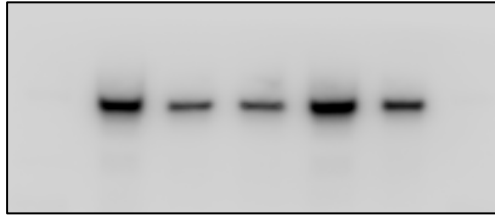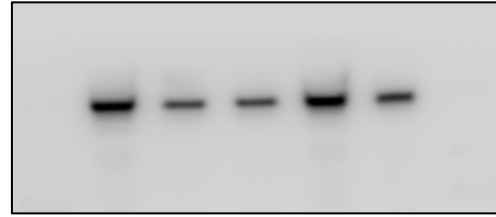

CAPN2

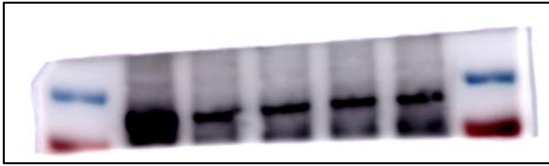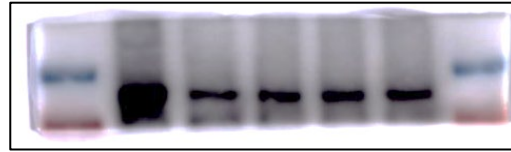

$\beta$ -Tubulin

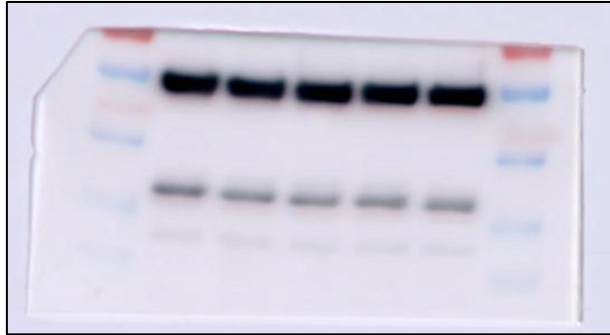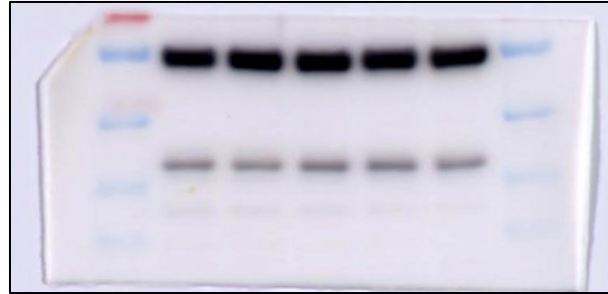

GLI2

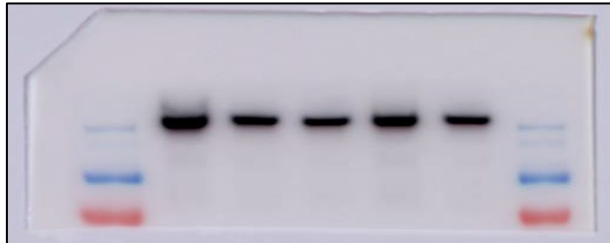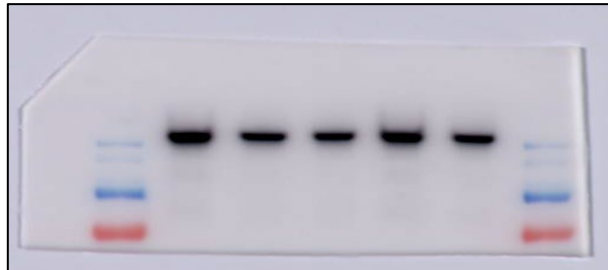

CAPN2

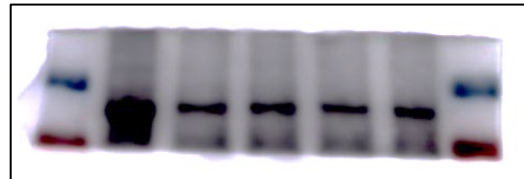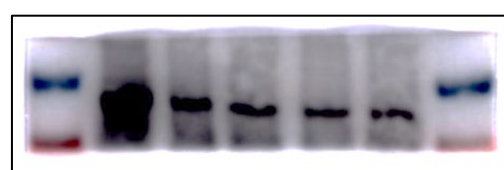

$\beta$ -Tubulin

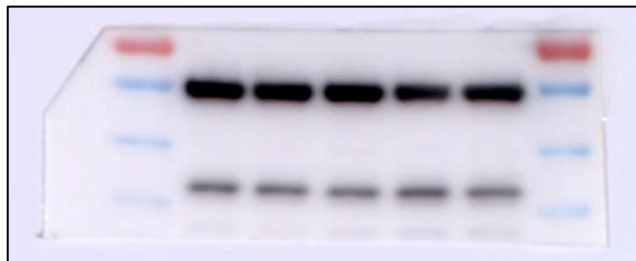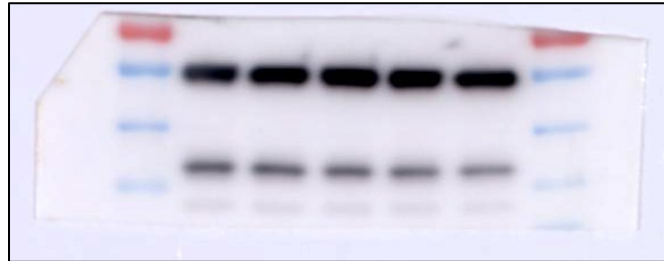

Fig. 5f

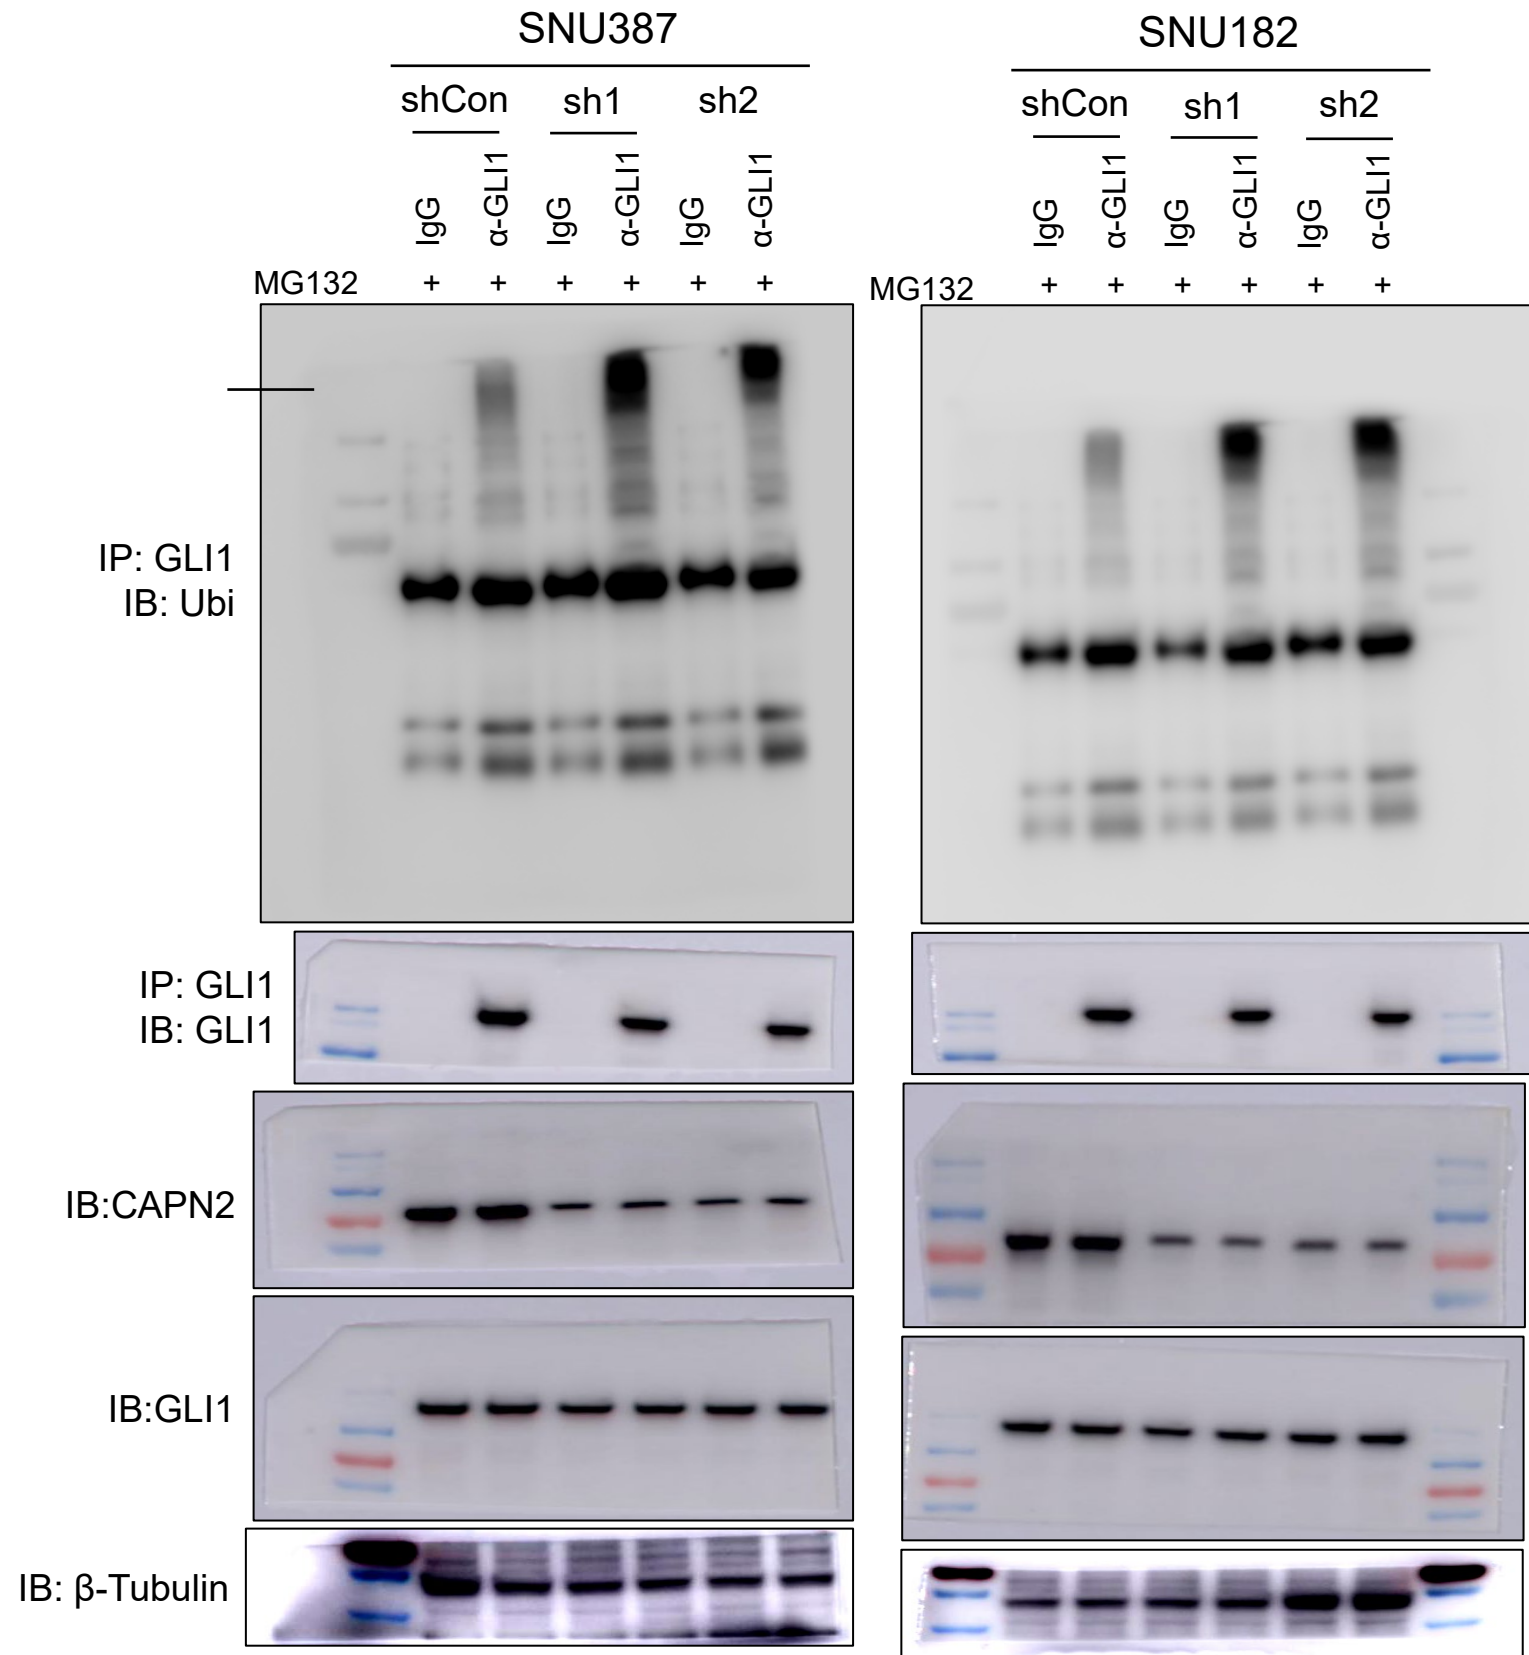

Fig. 5g

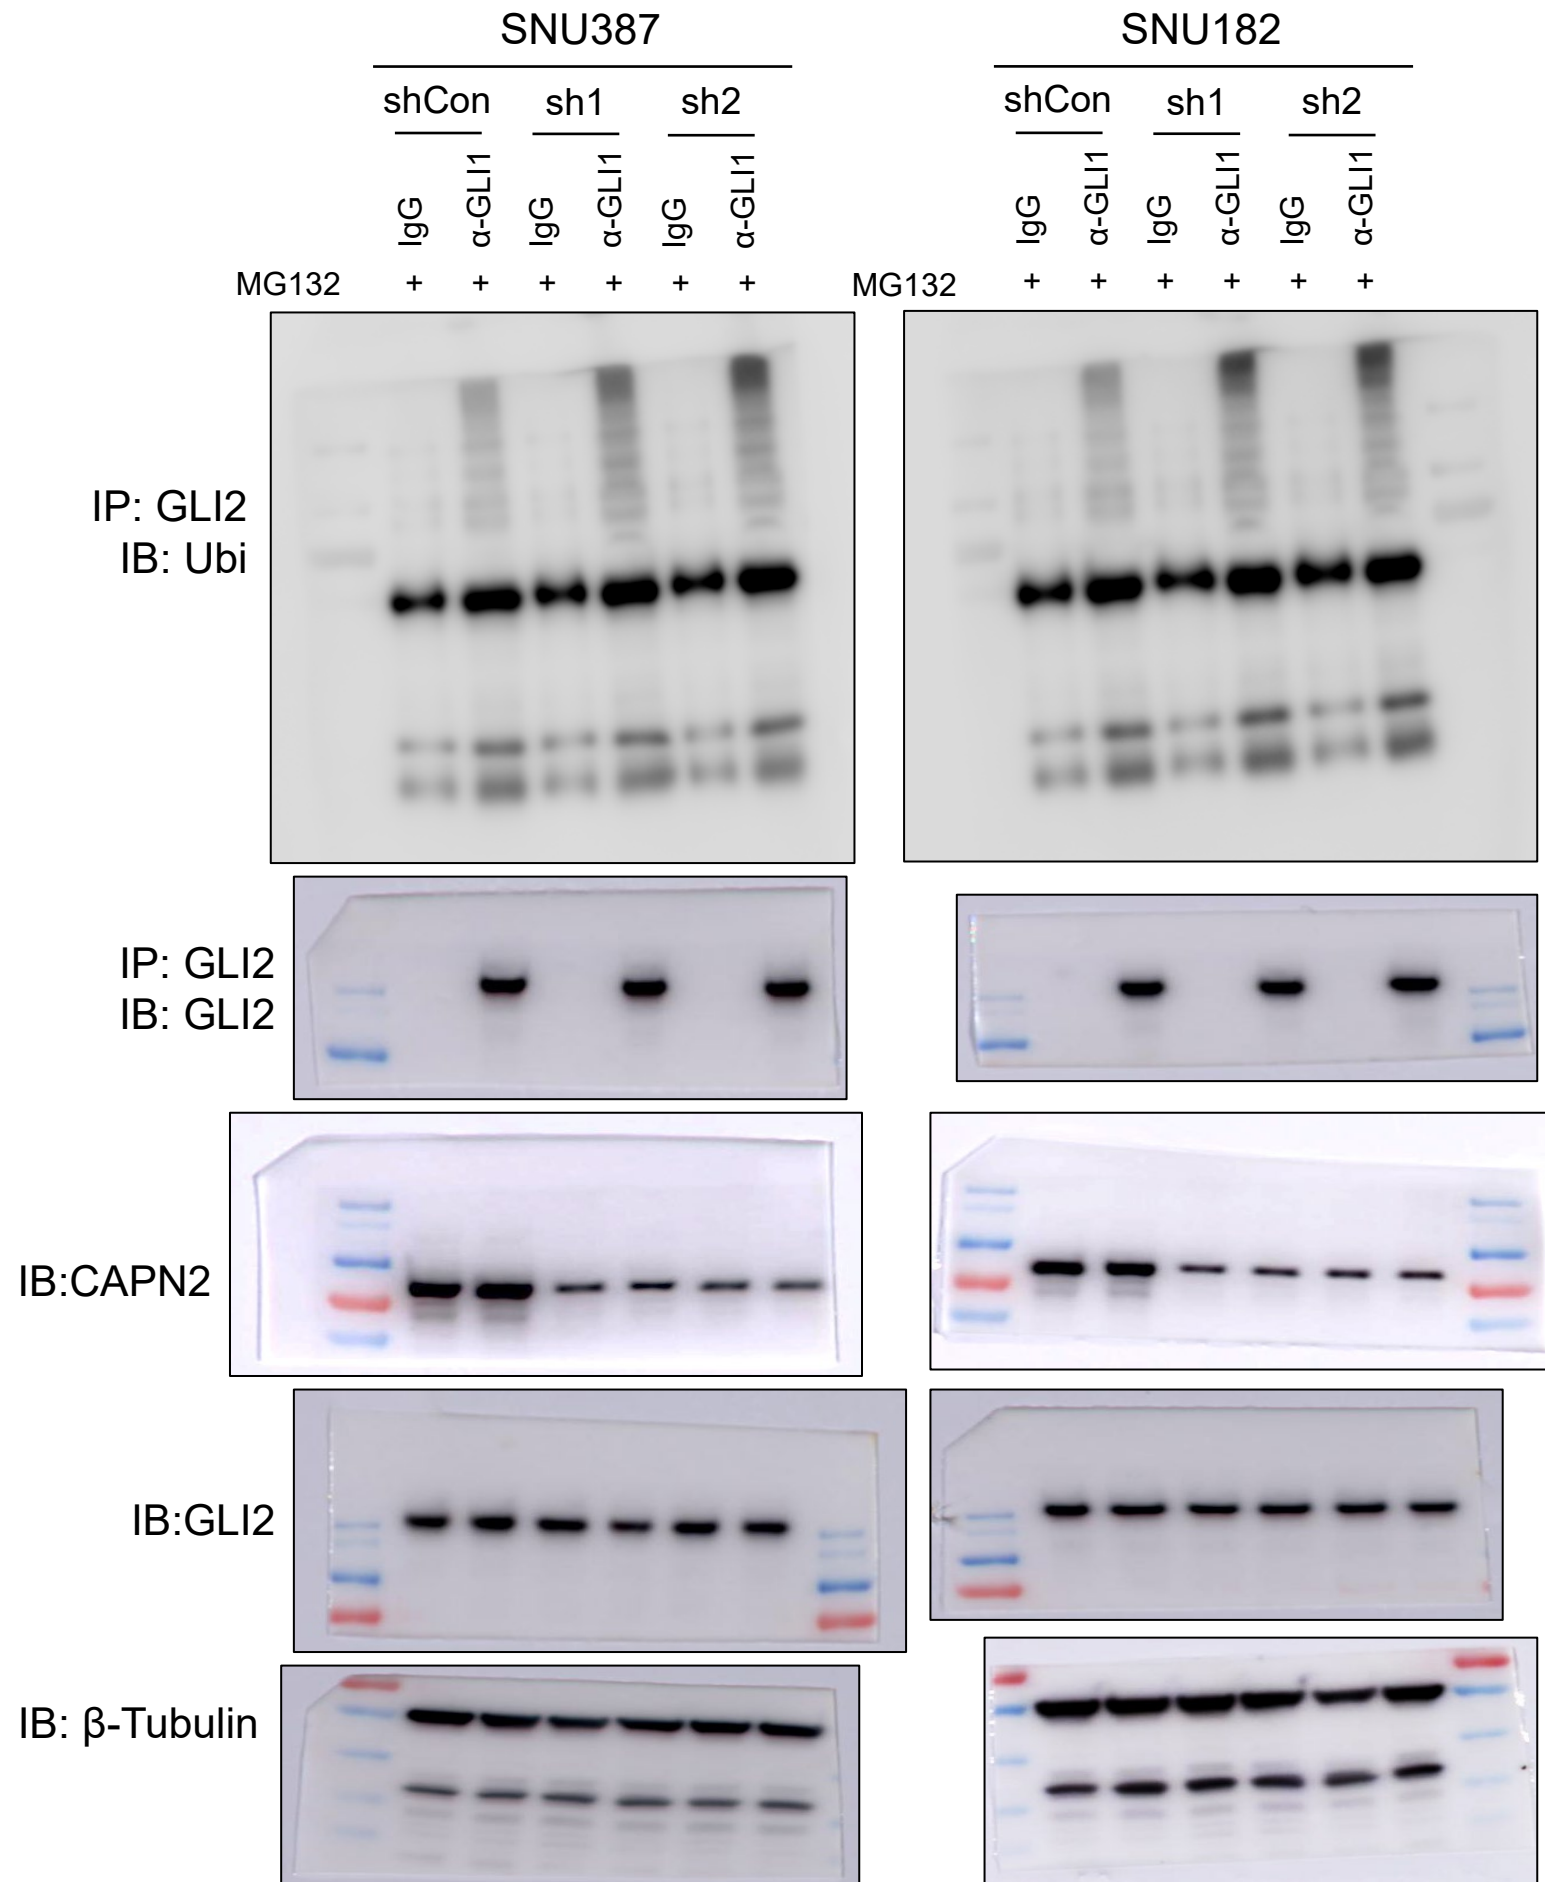

Fig. 5h

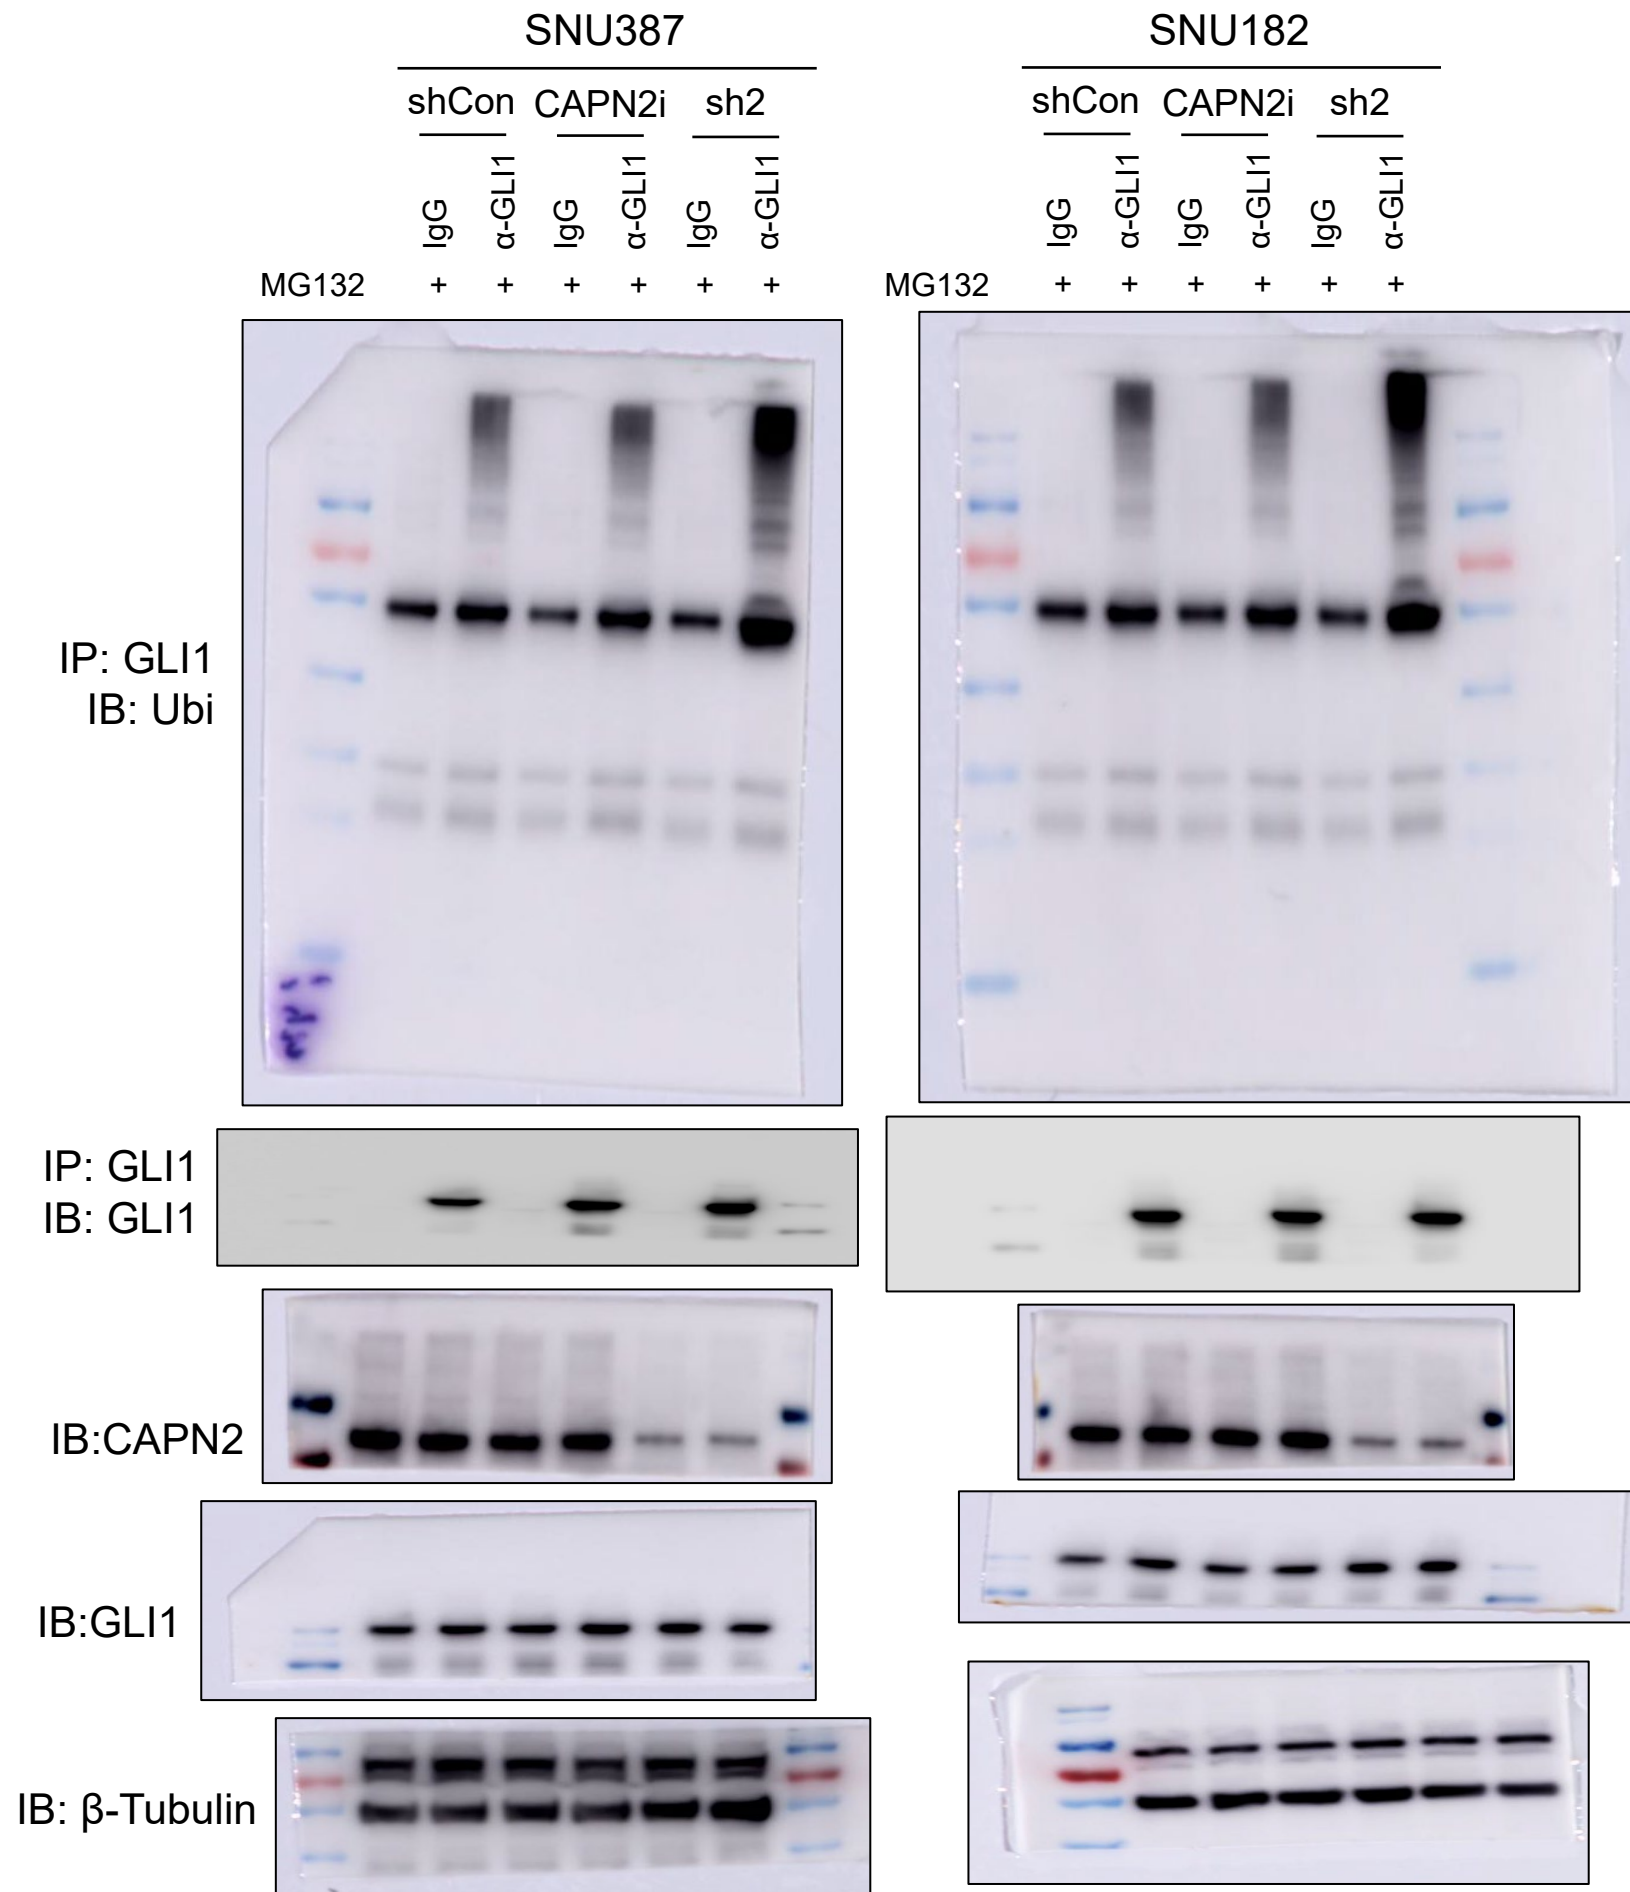



Fig. 5i

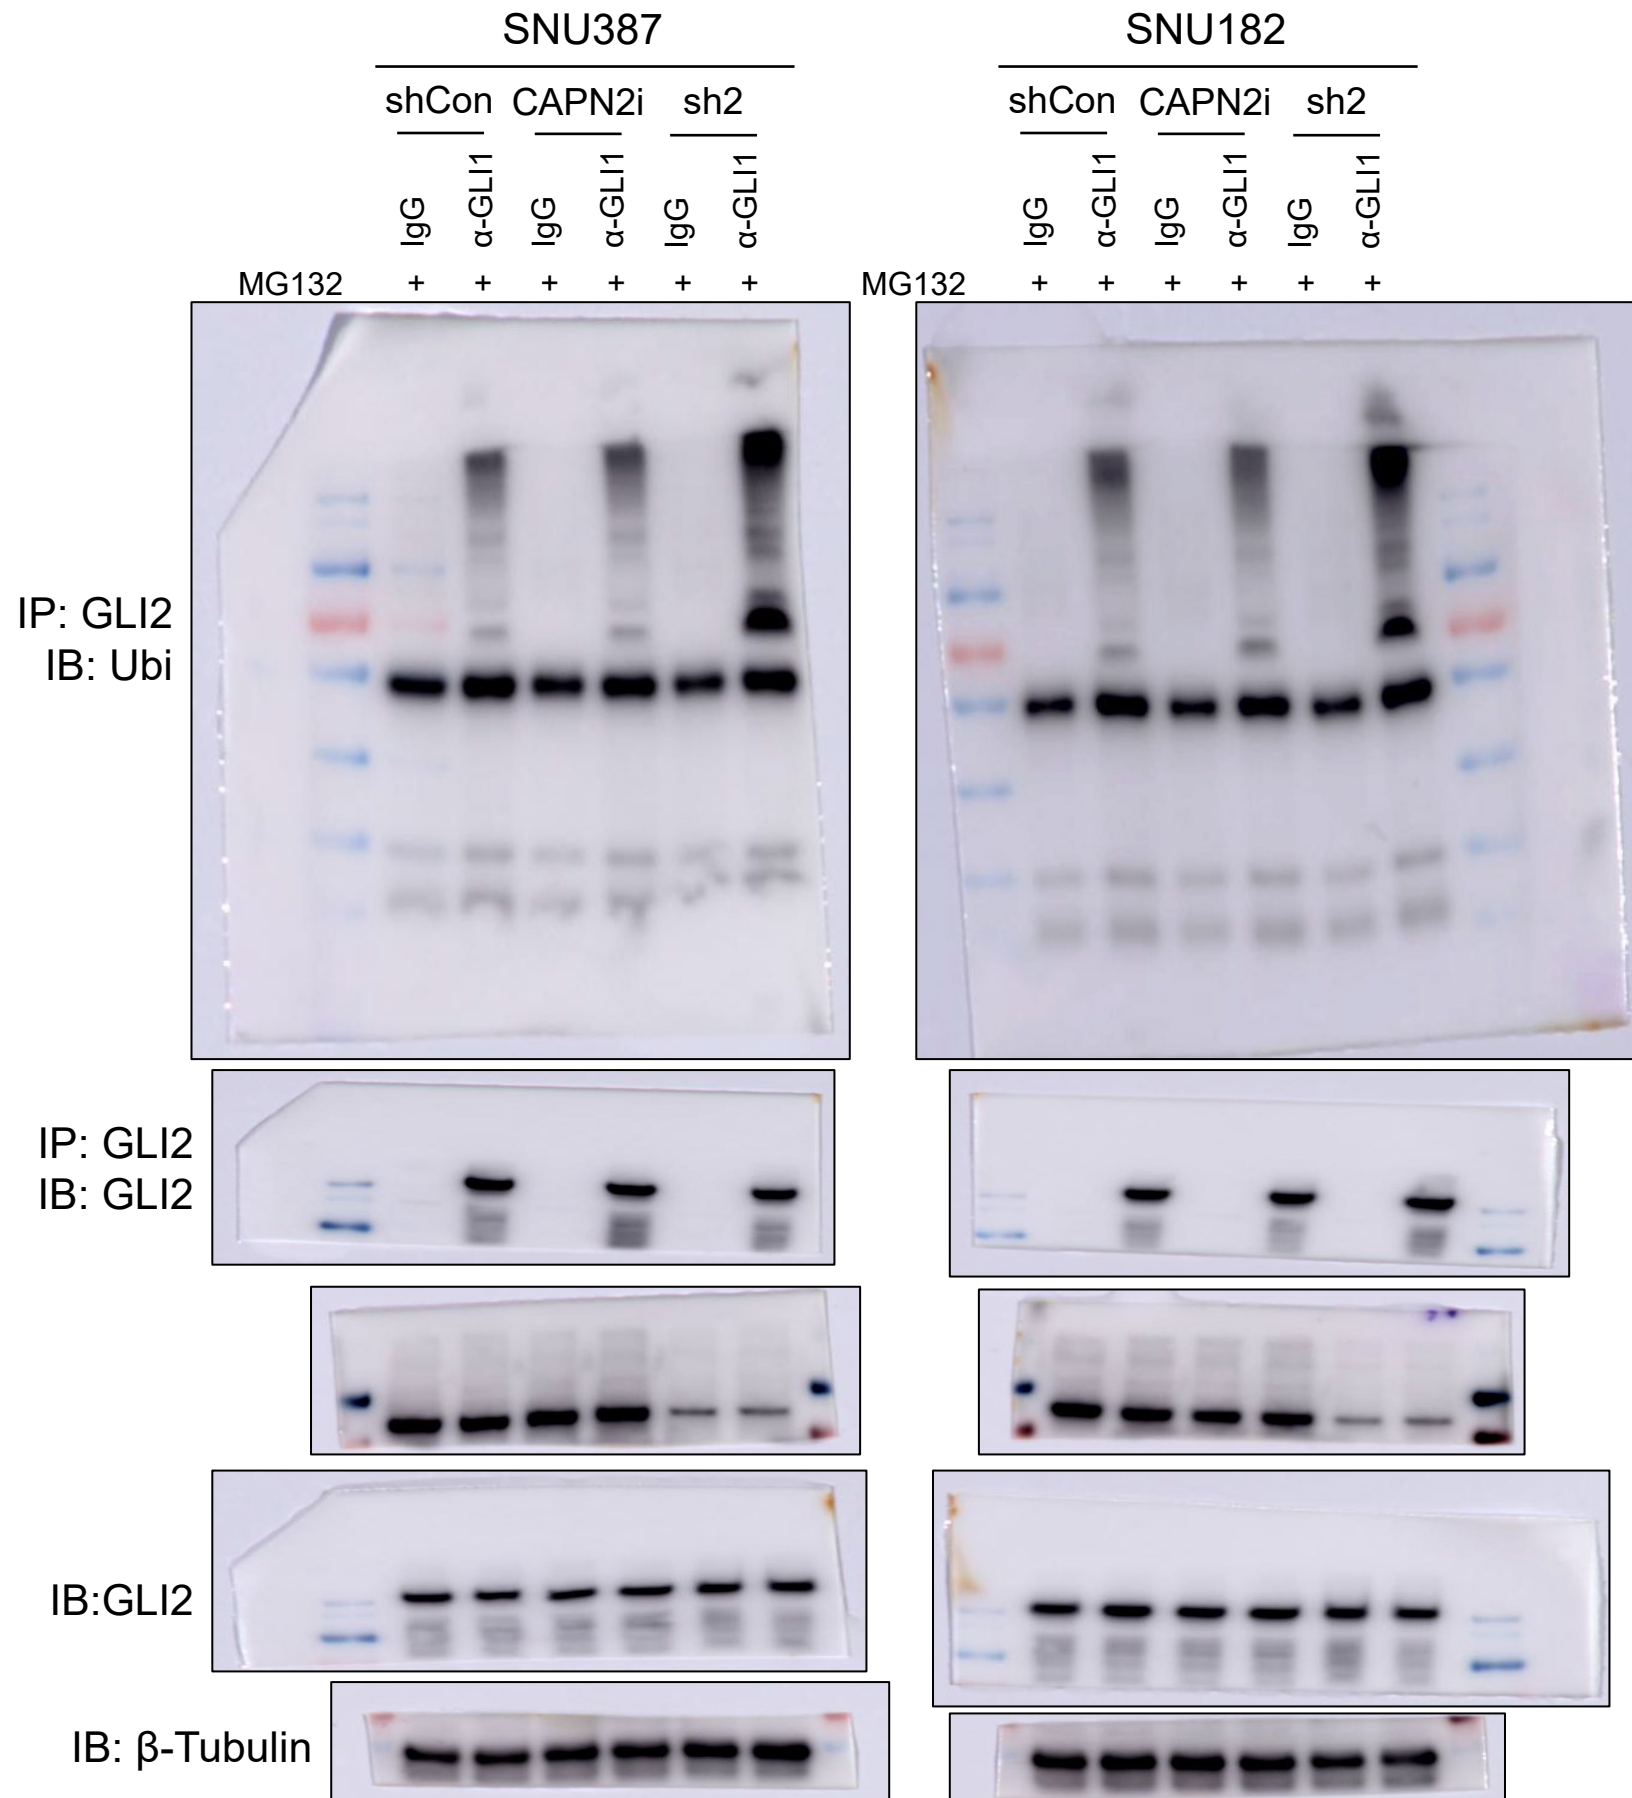



Fig. 6c

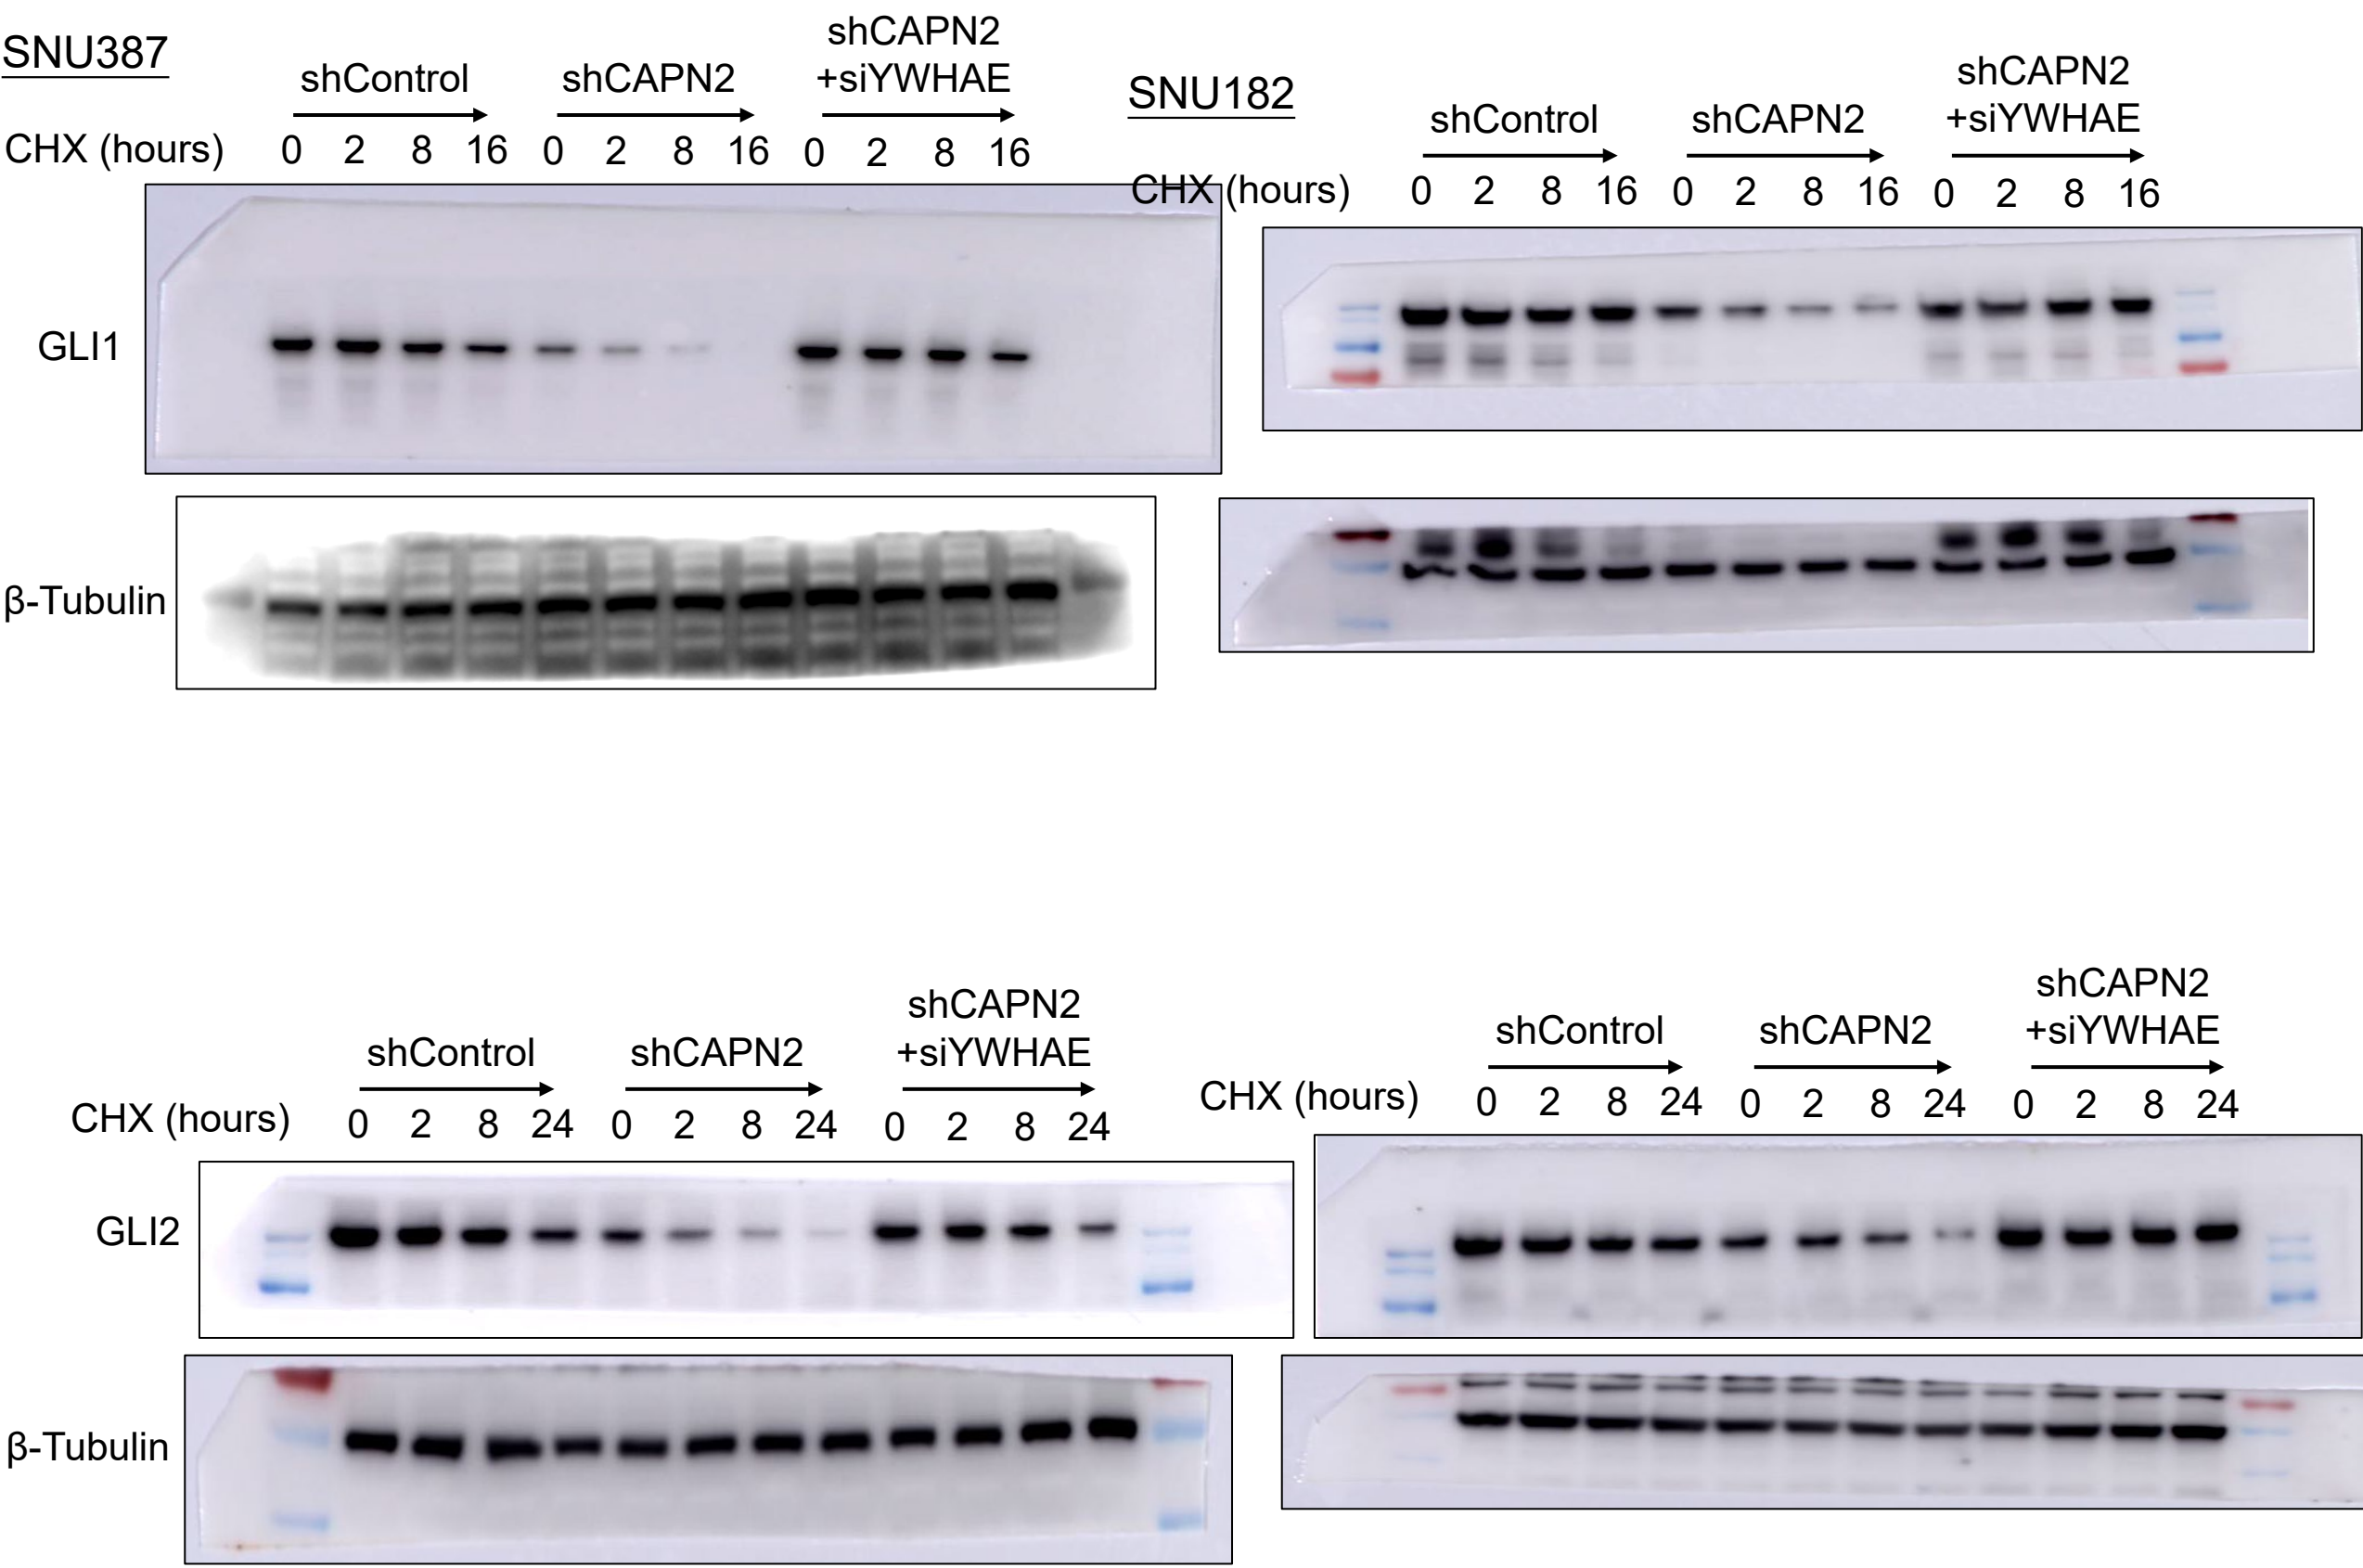



Fig. 6e

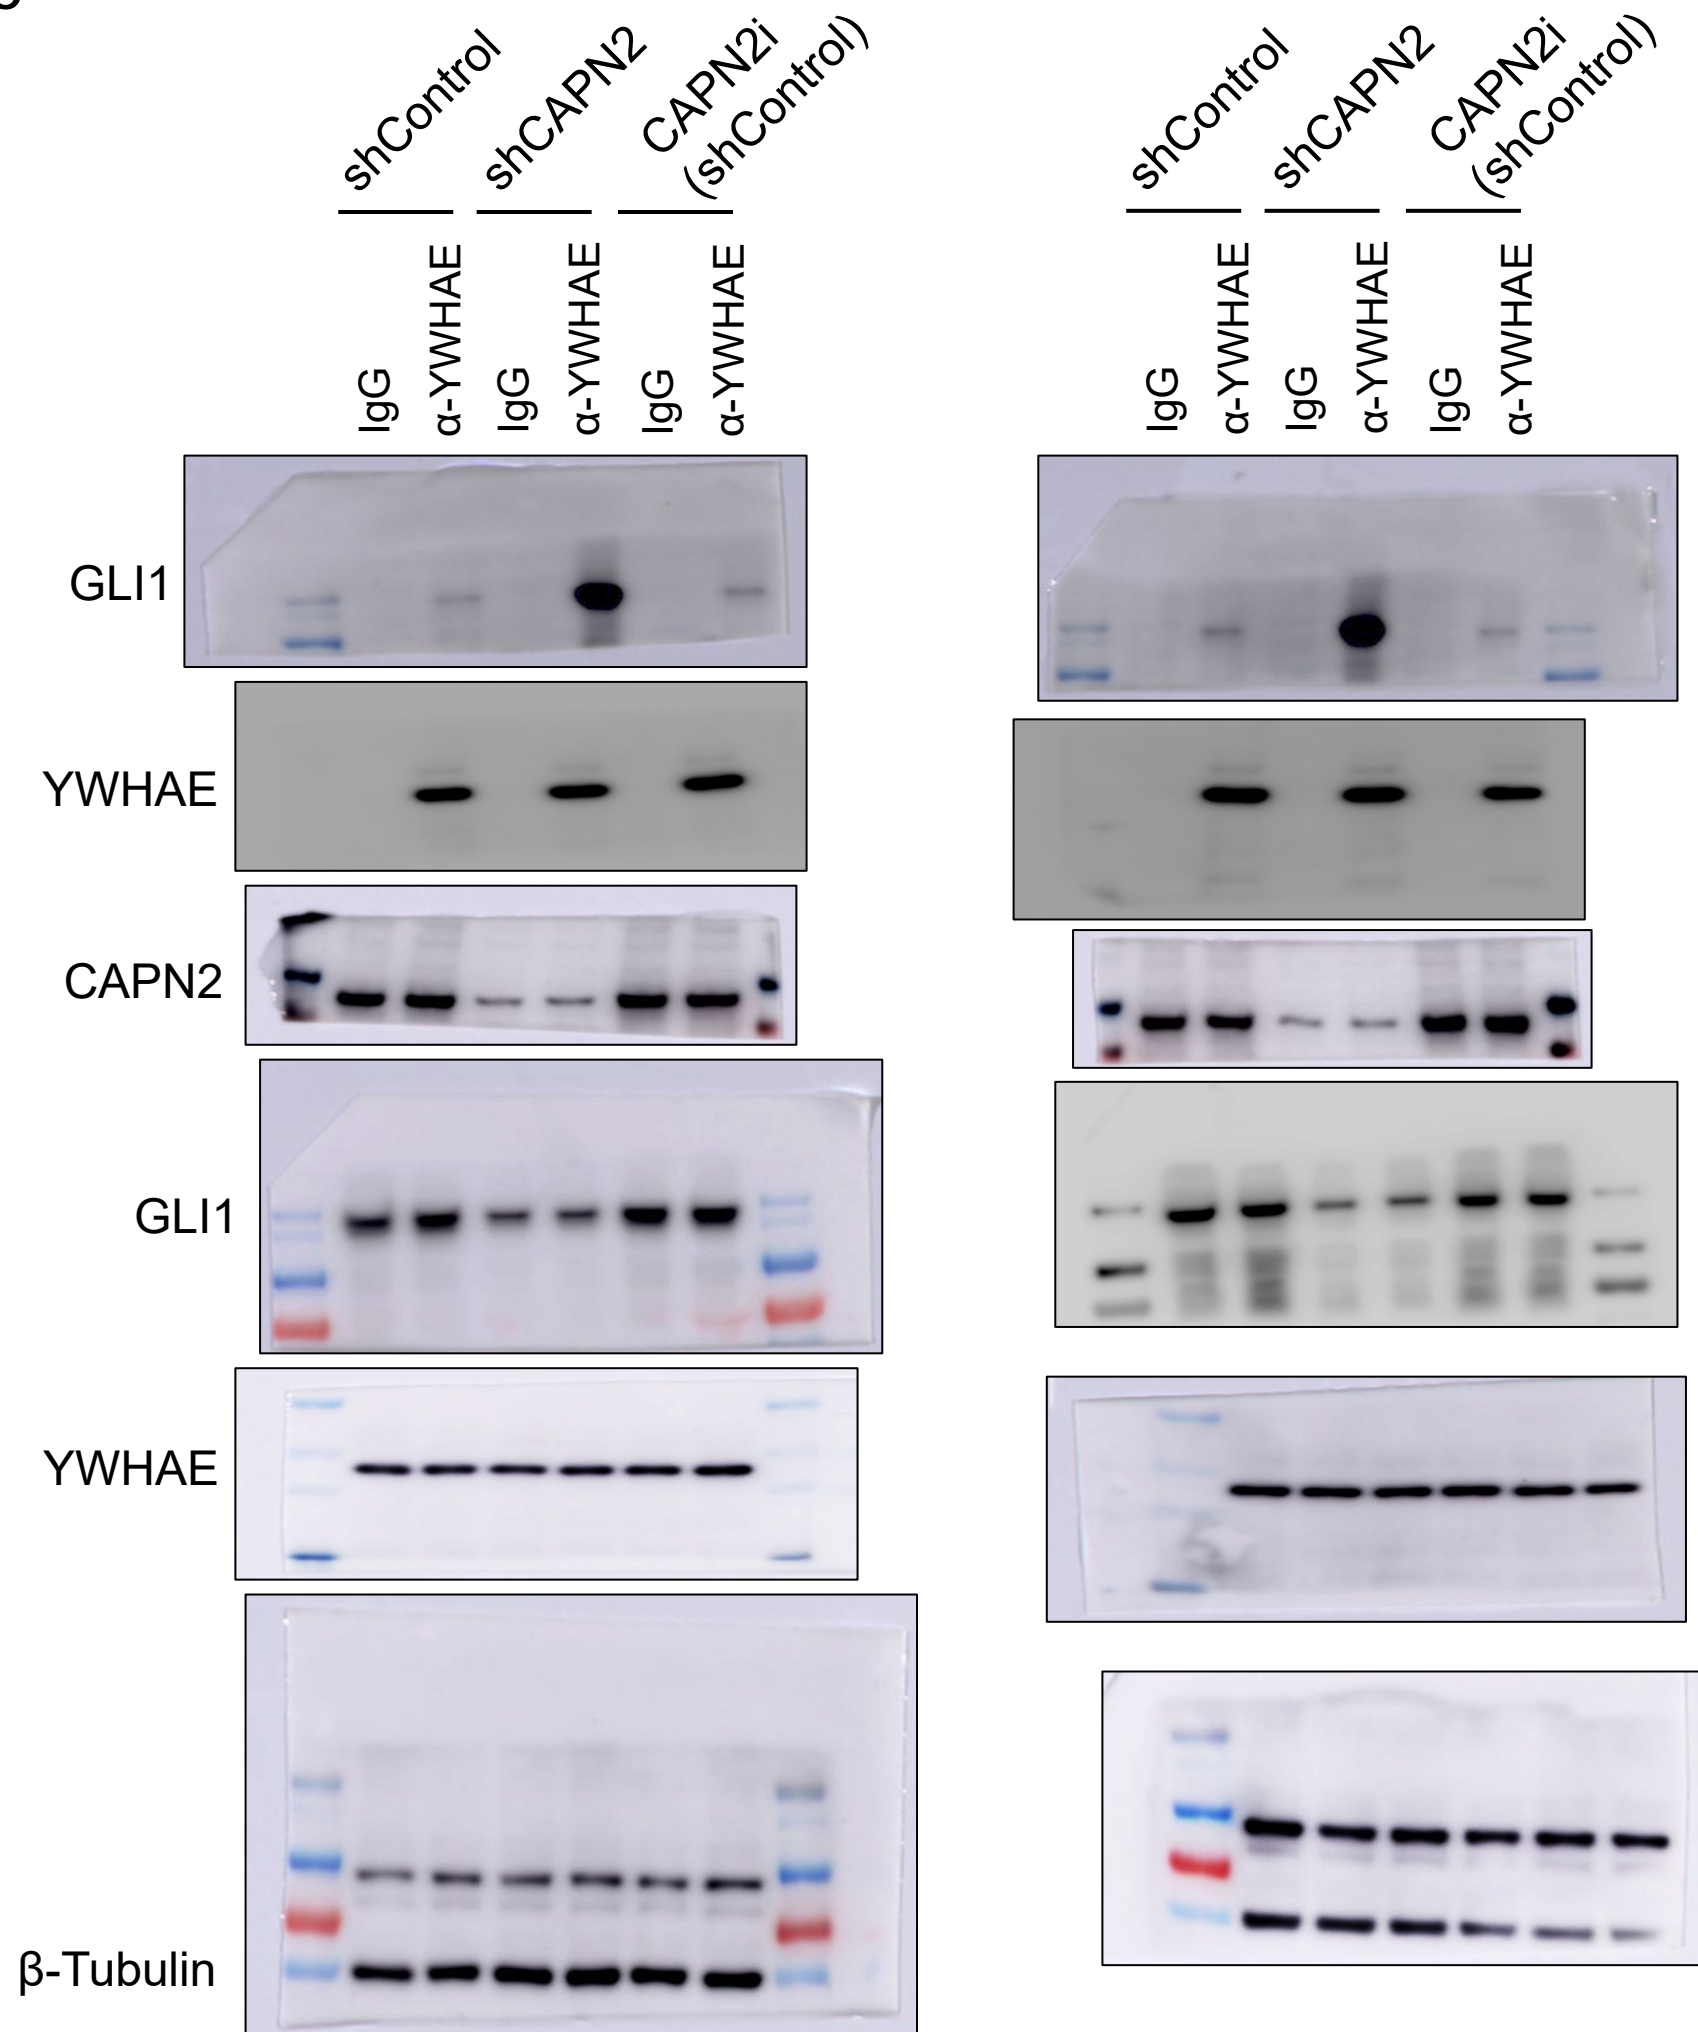

Fig. 6f

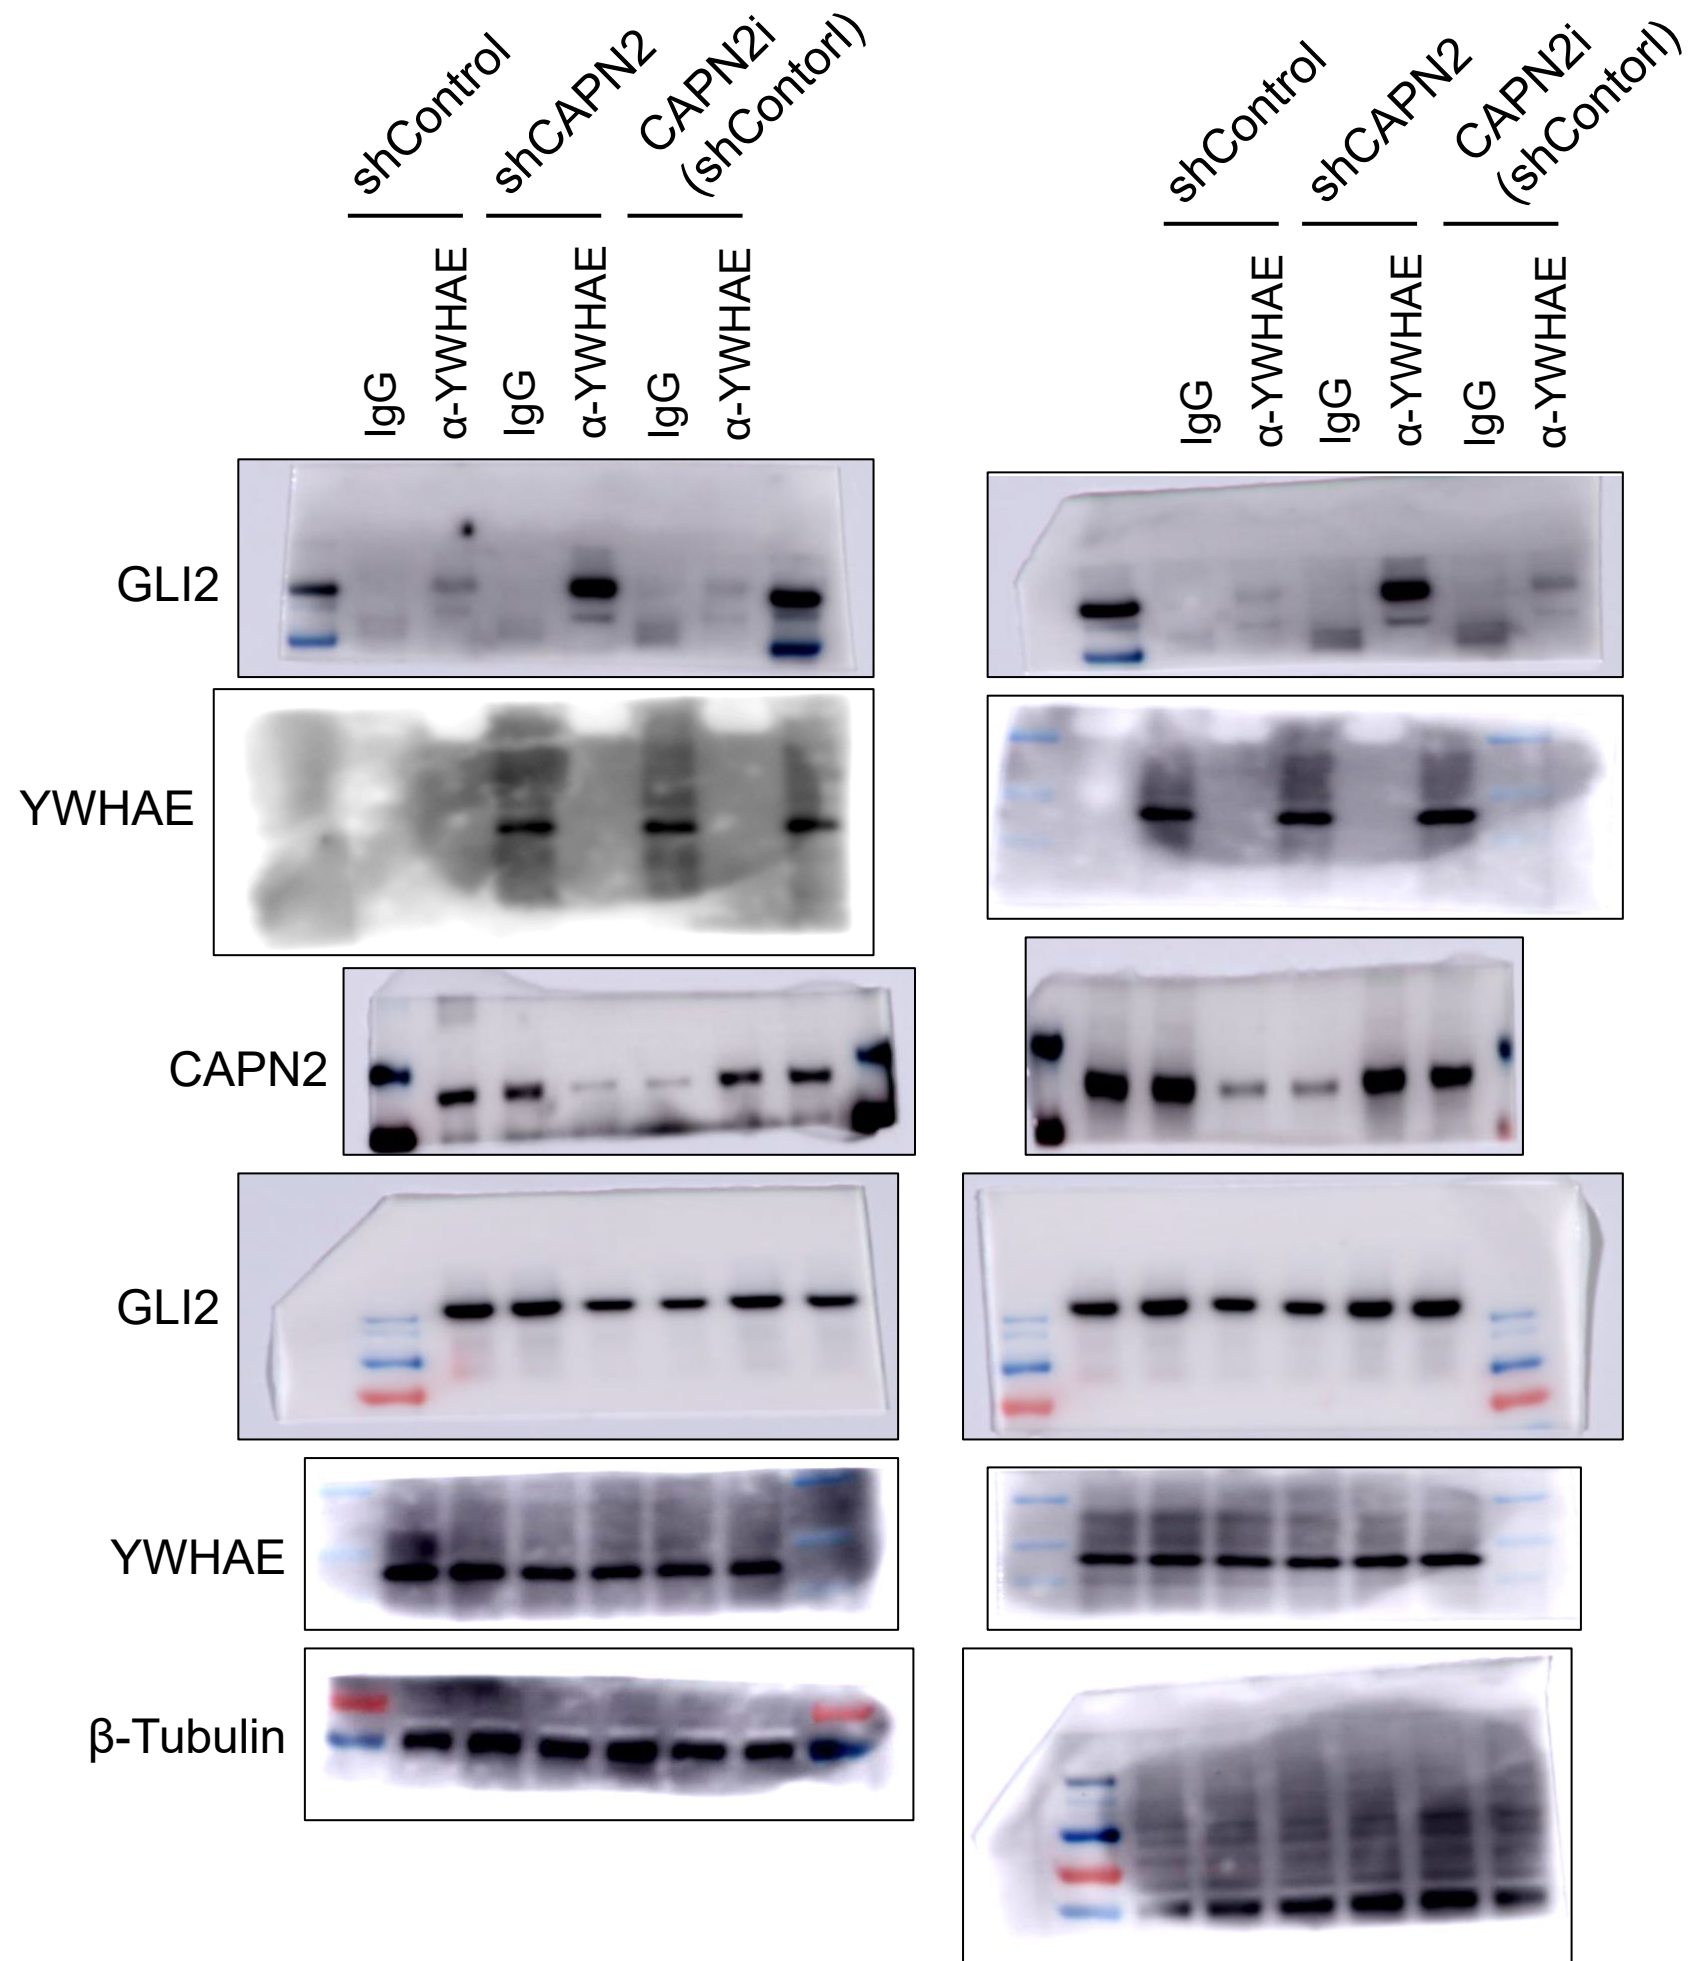

Fig. 6g

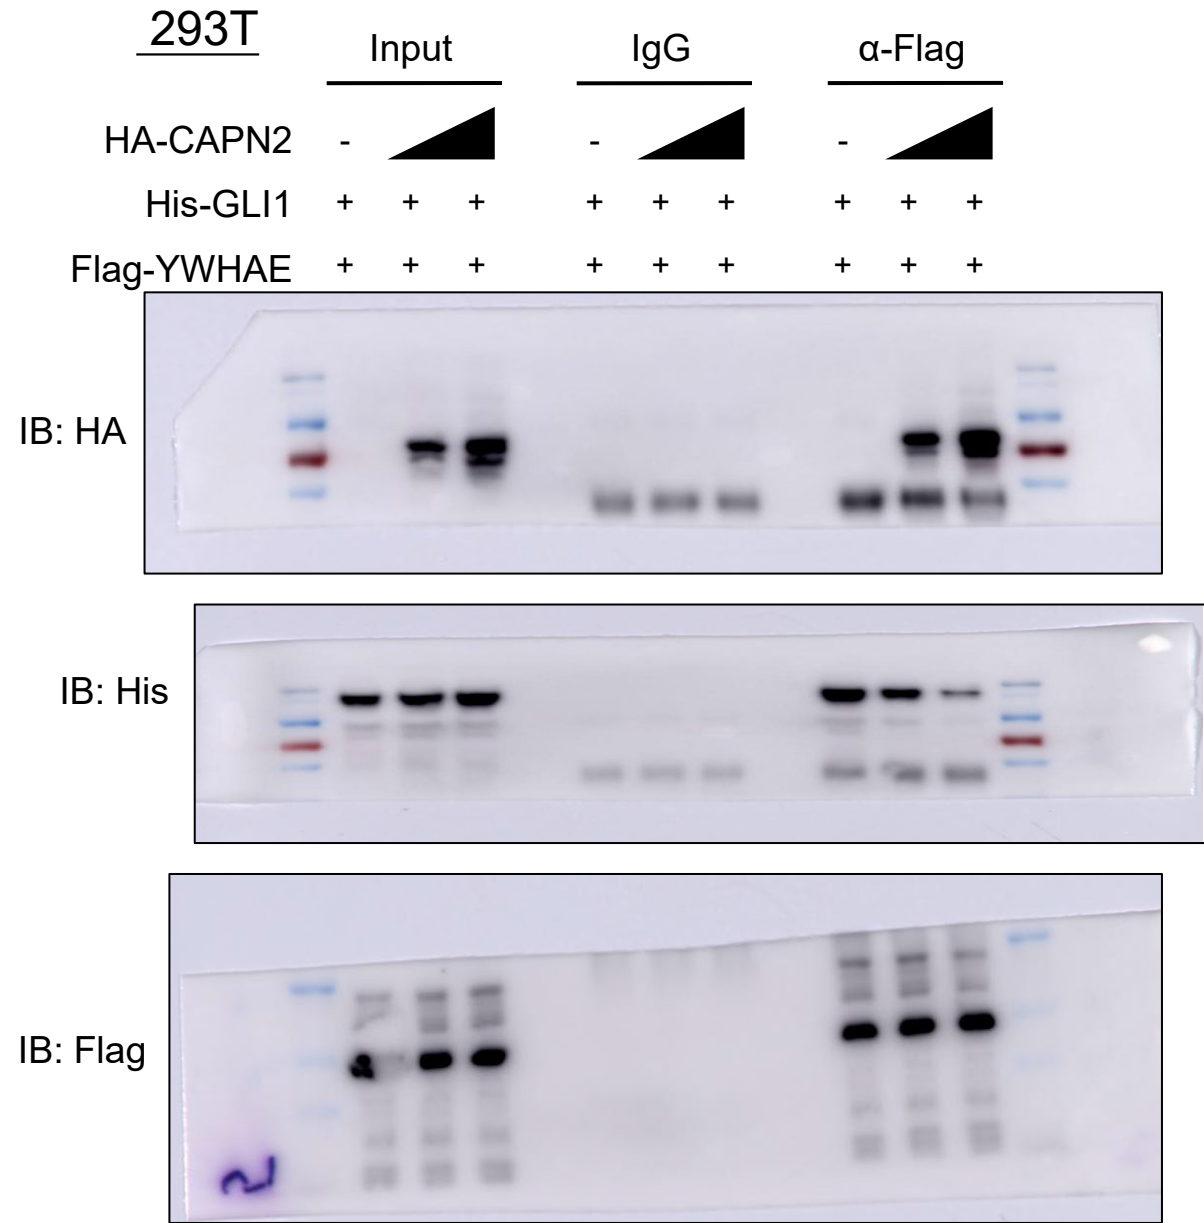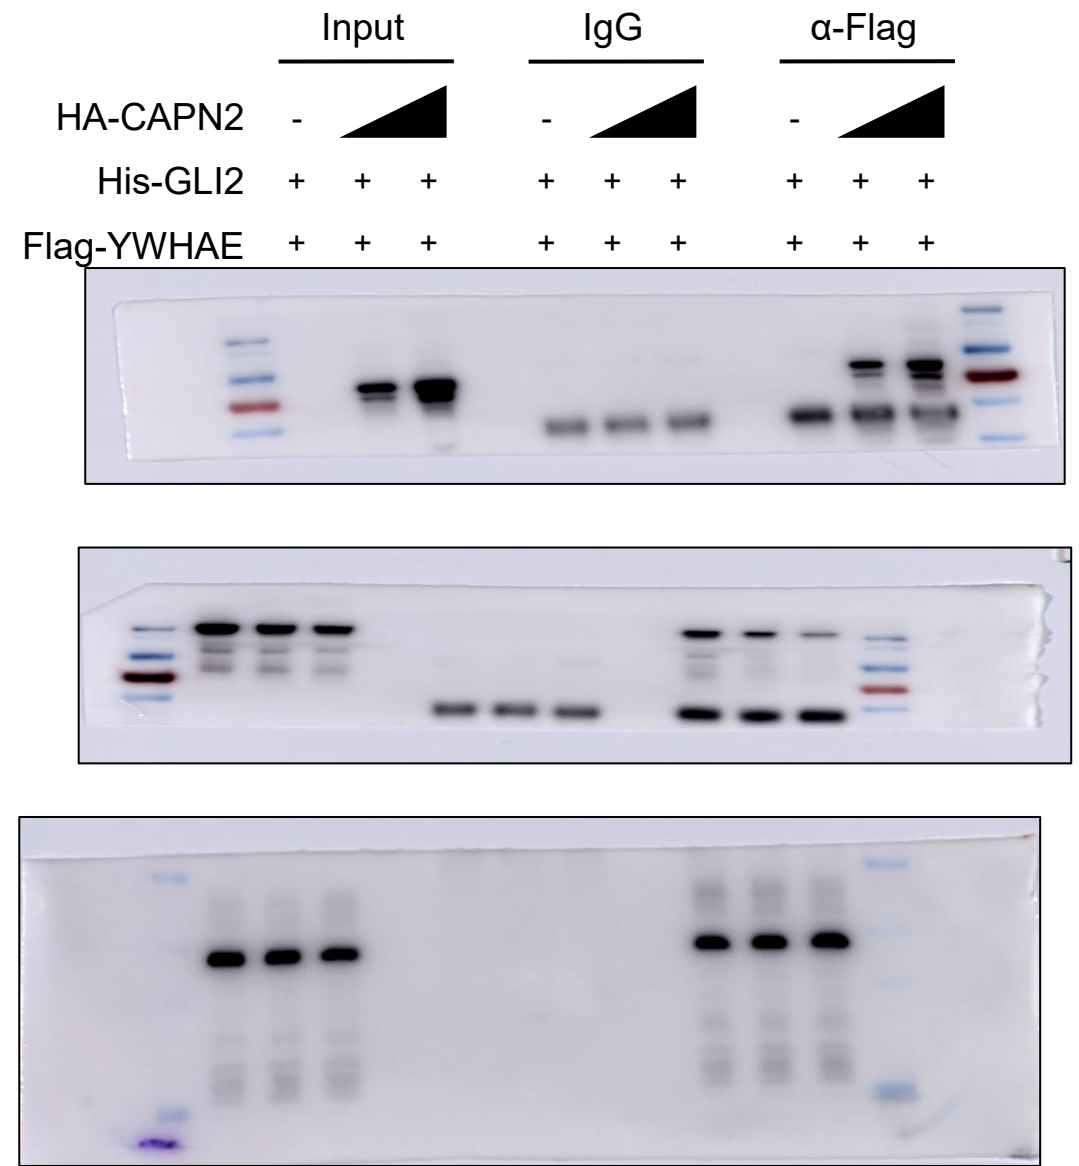

Fig. 6h

Fig. 7e

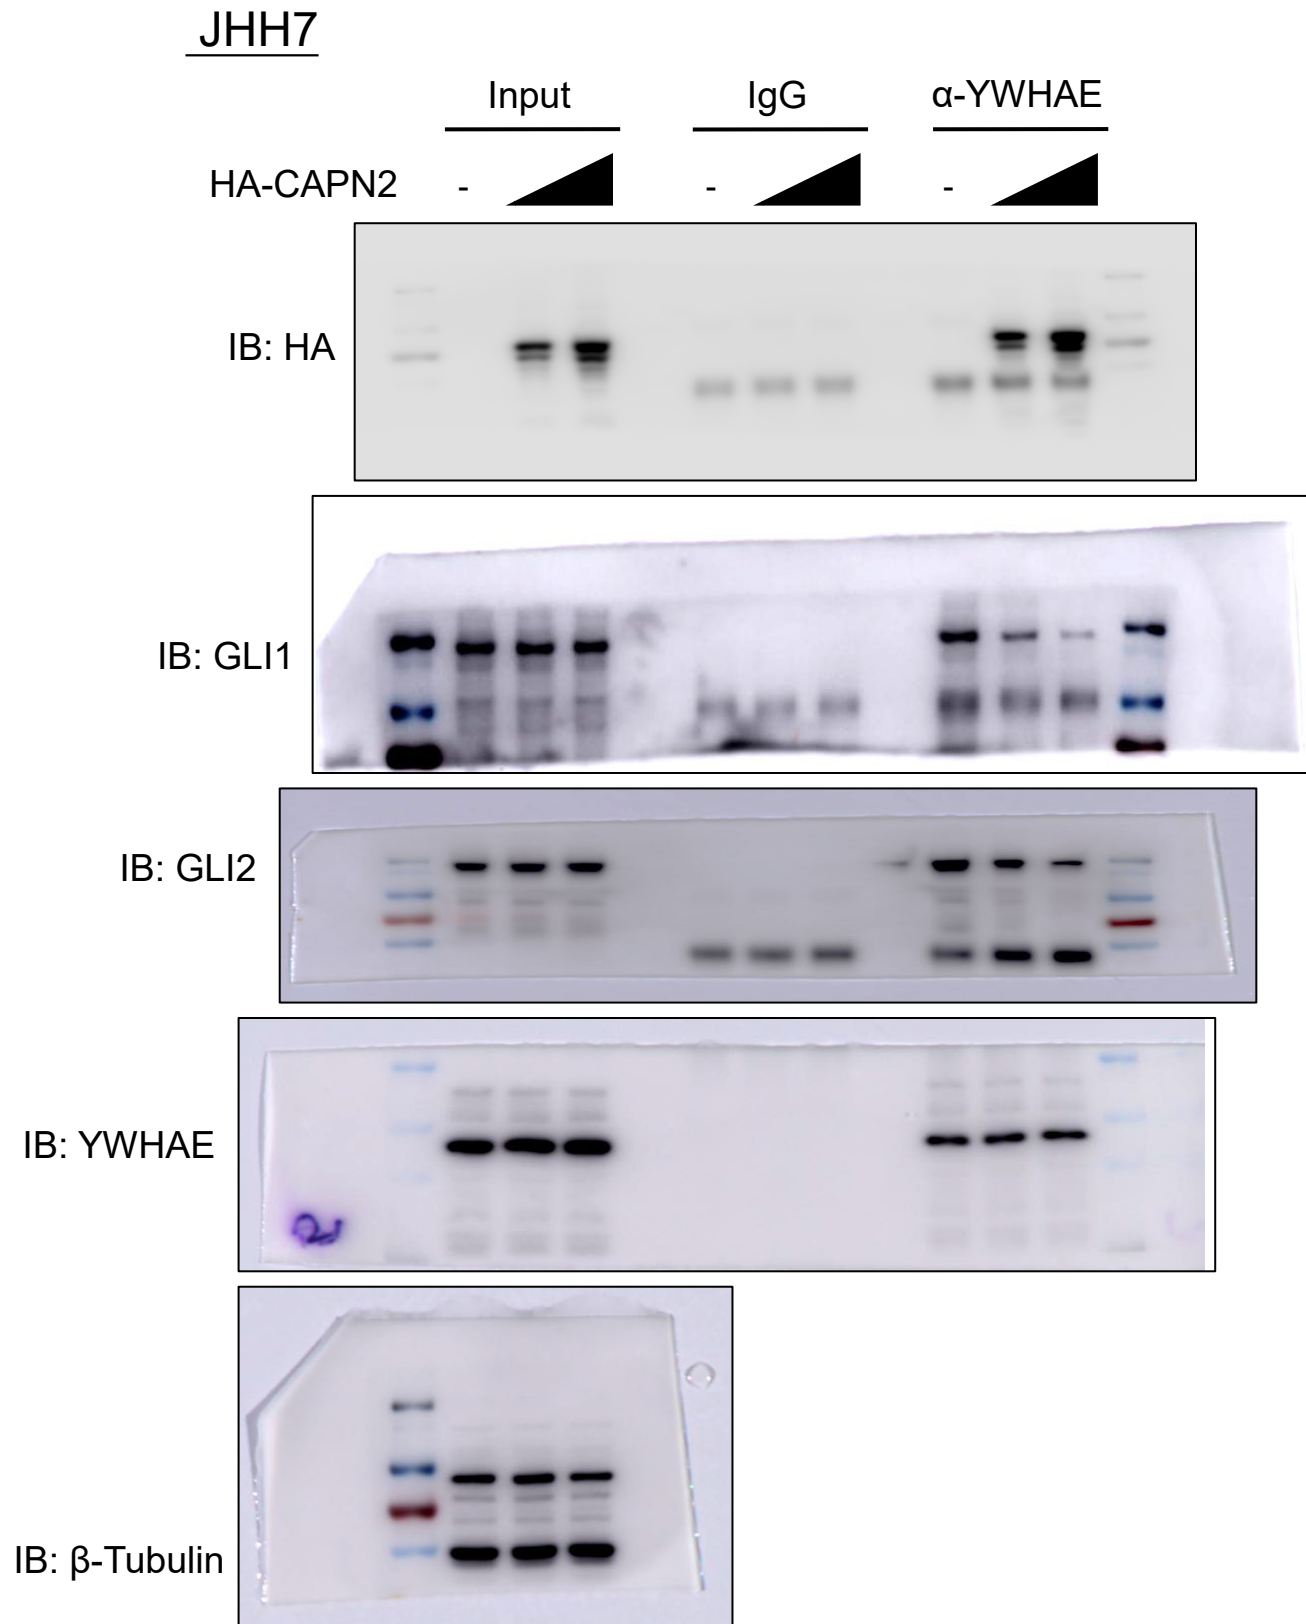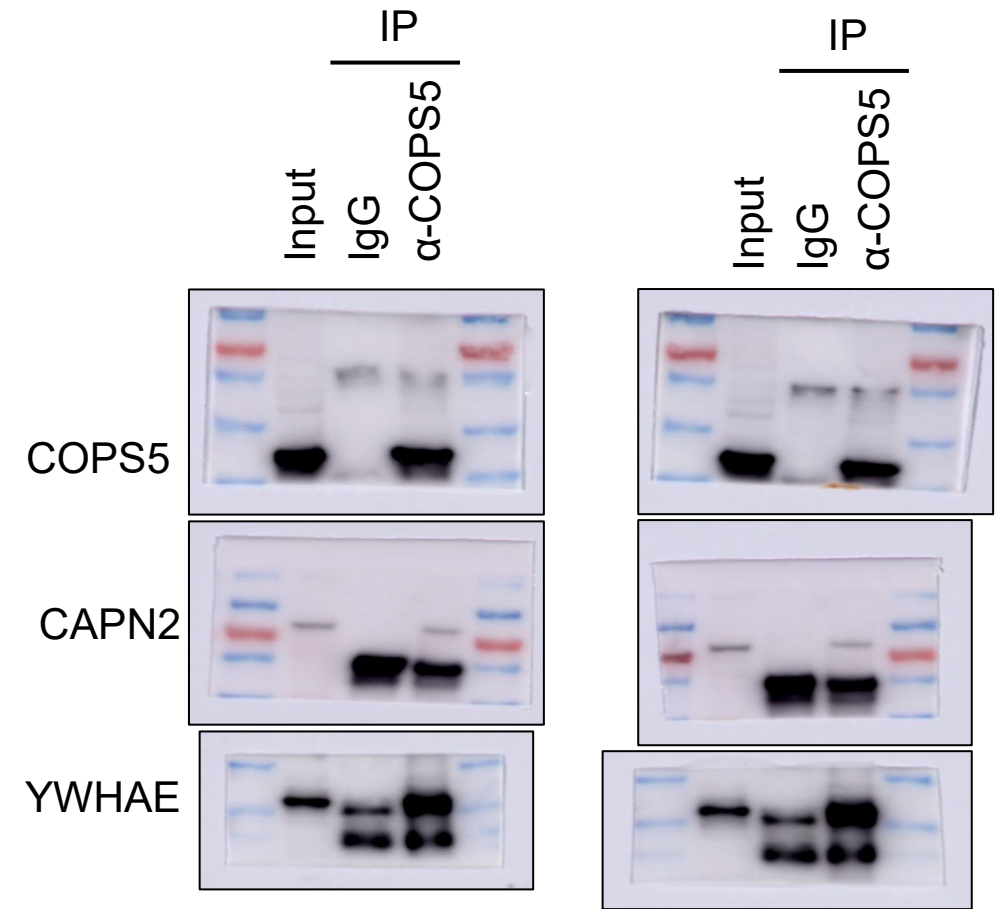



Fig. 6i

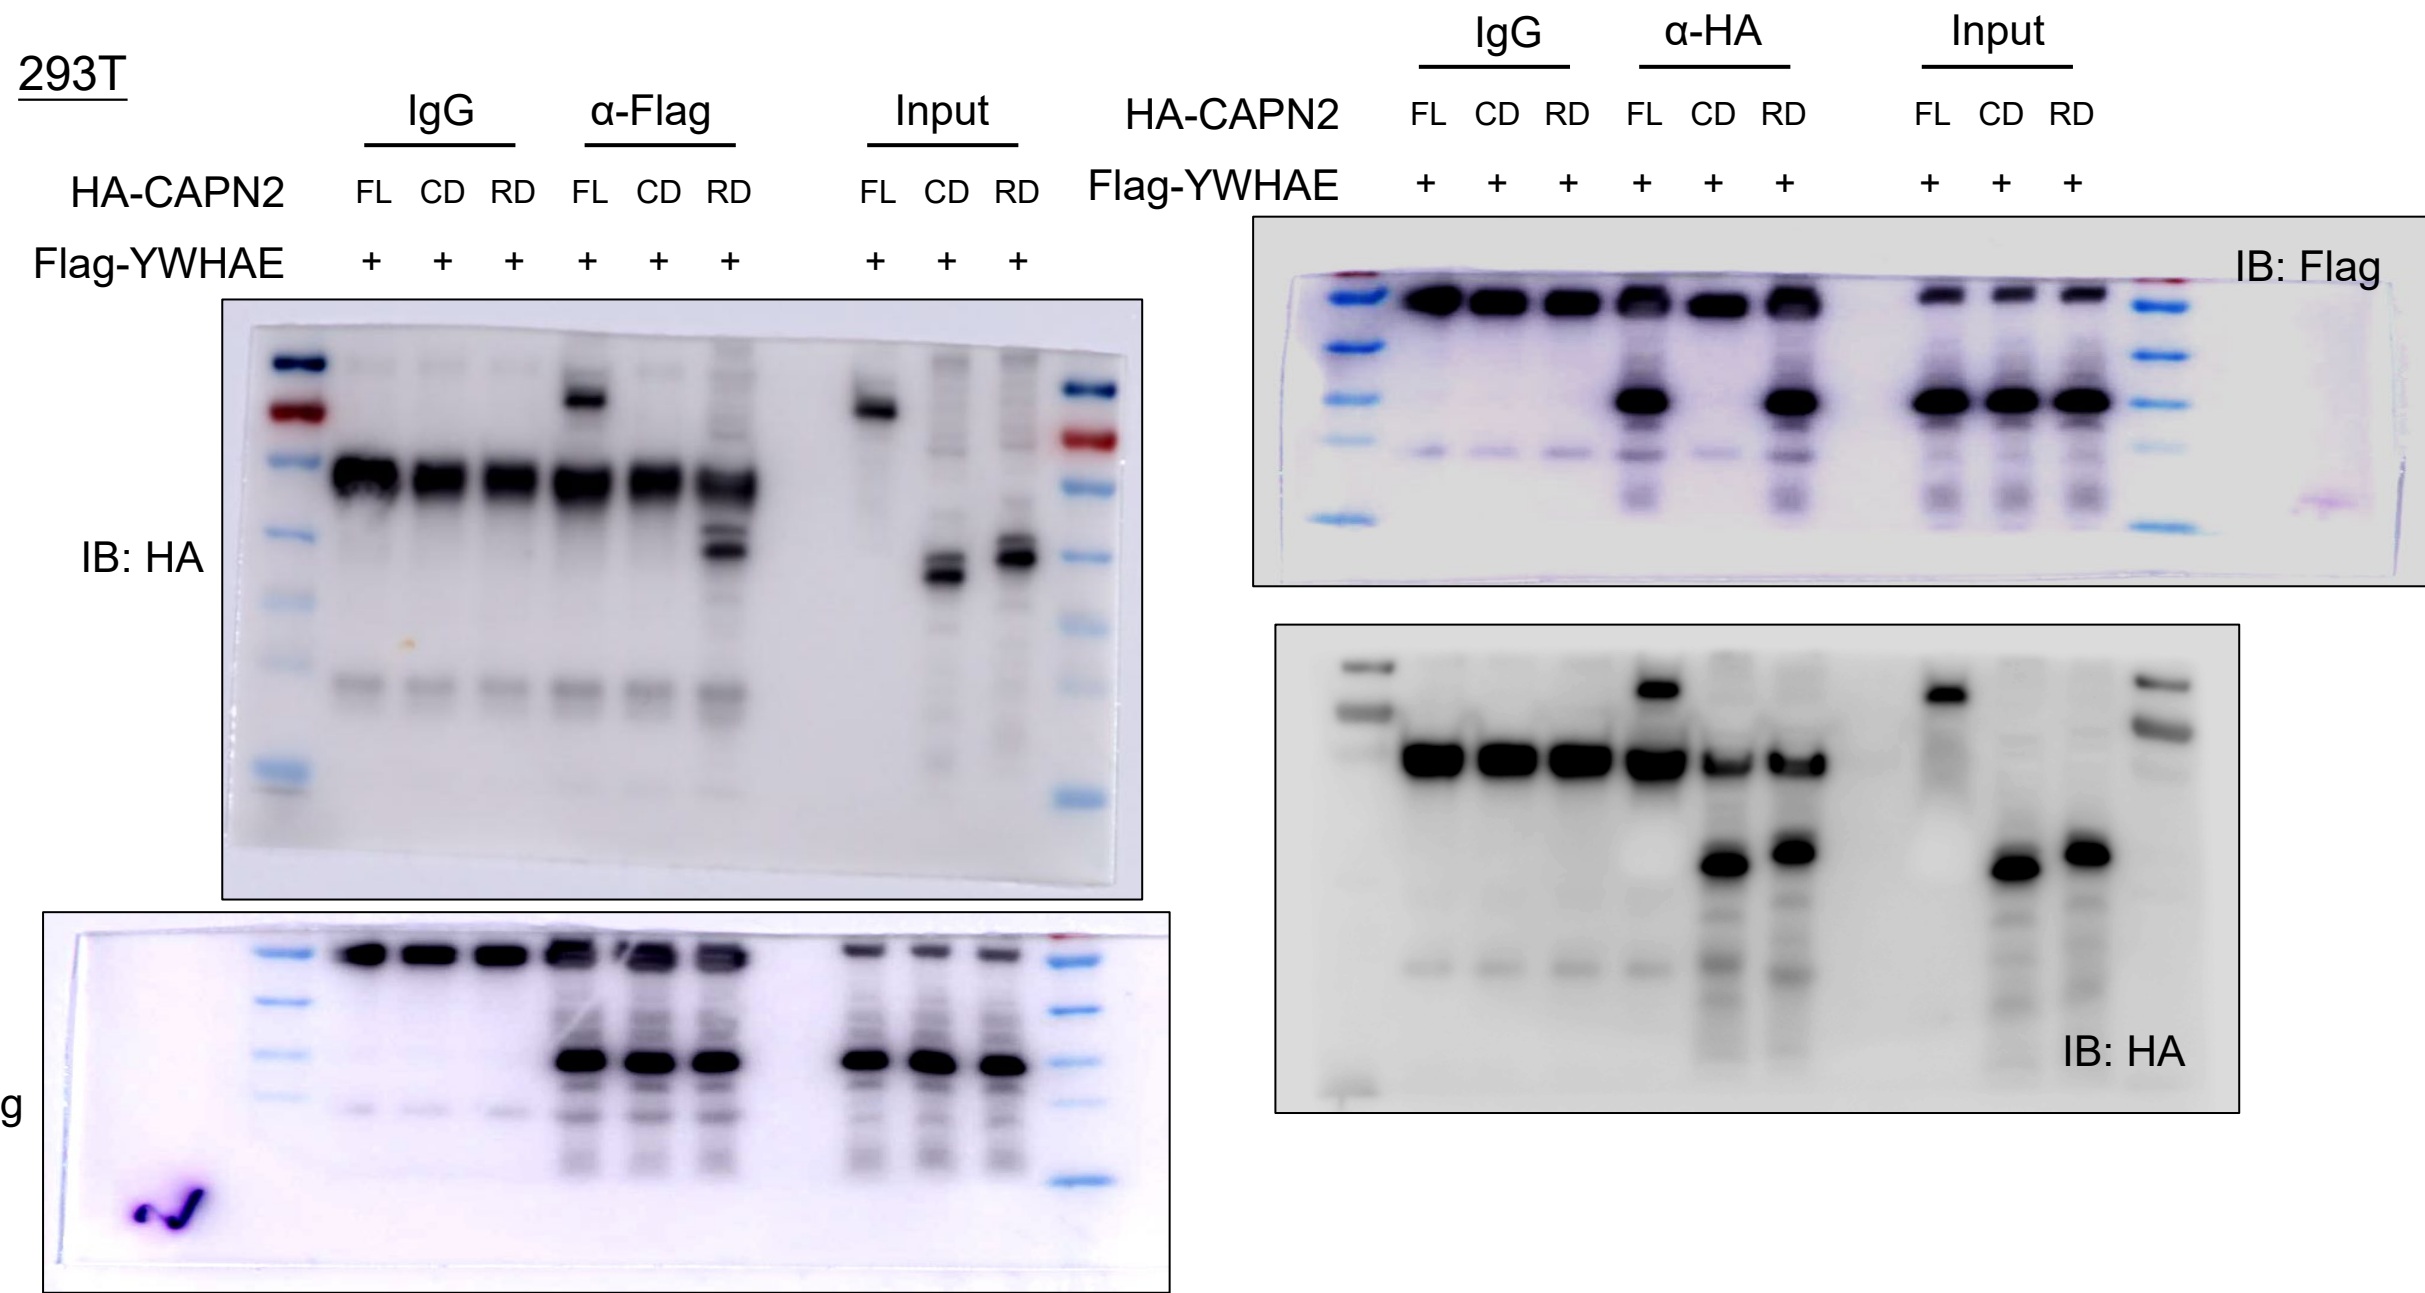

Fig. 6j

SNU387

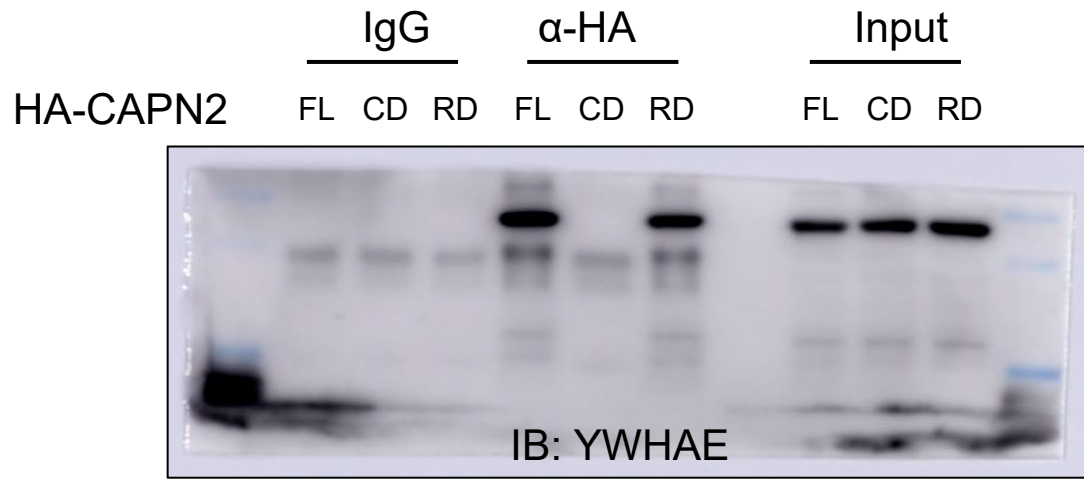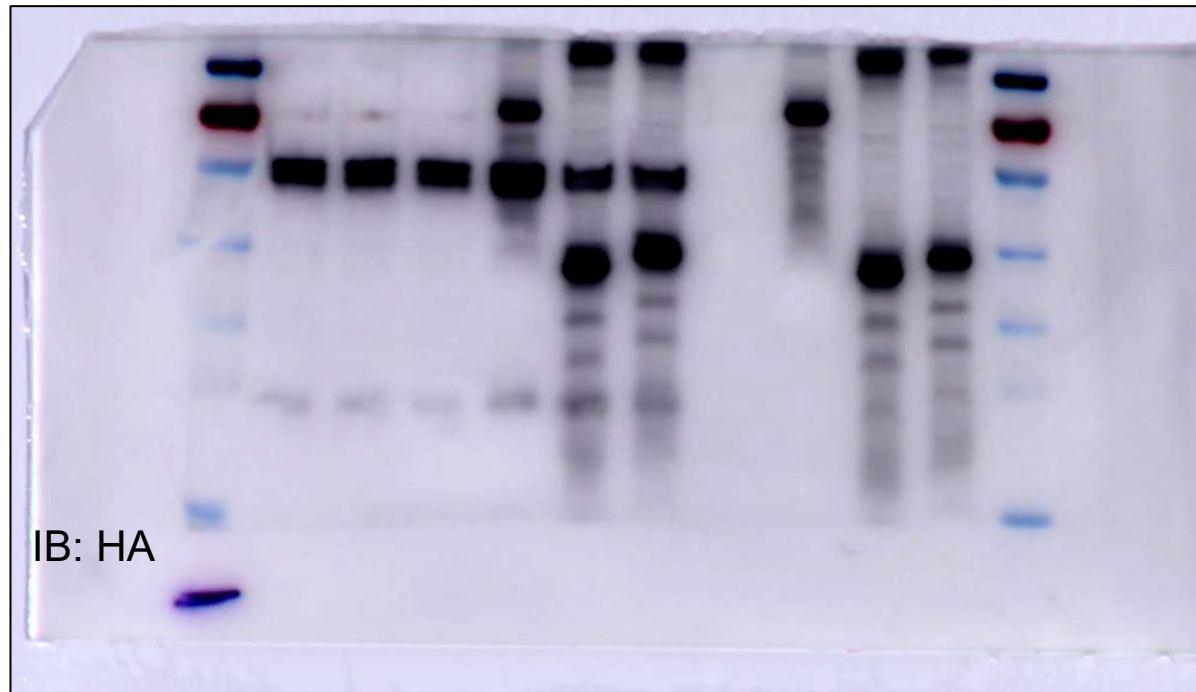

SNU182

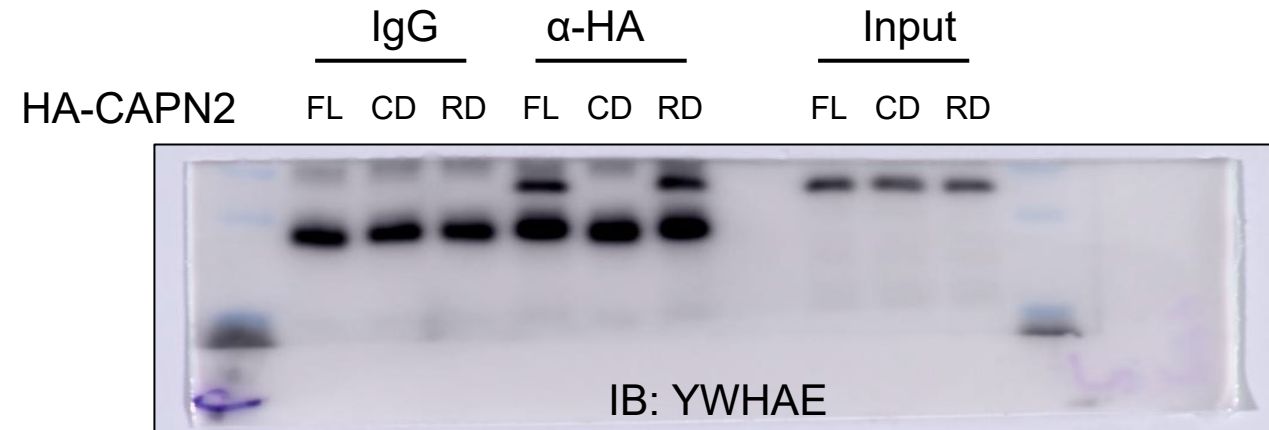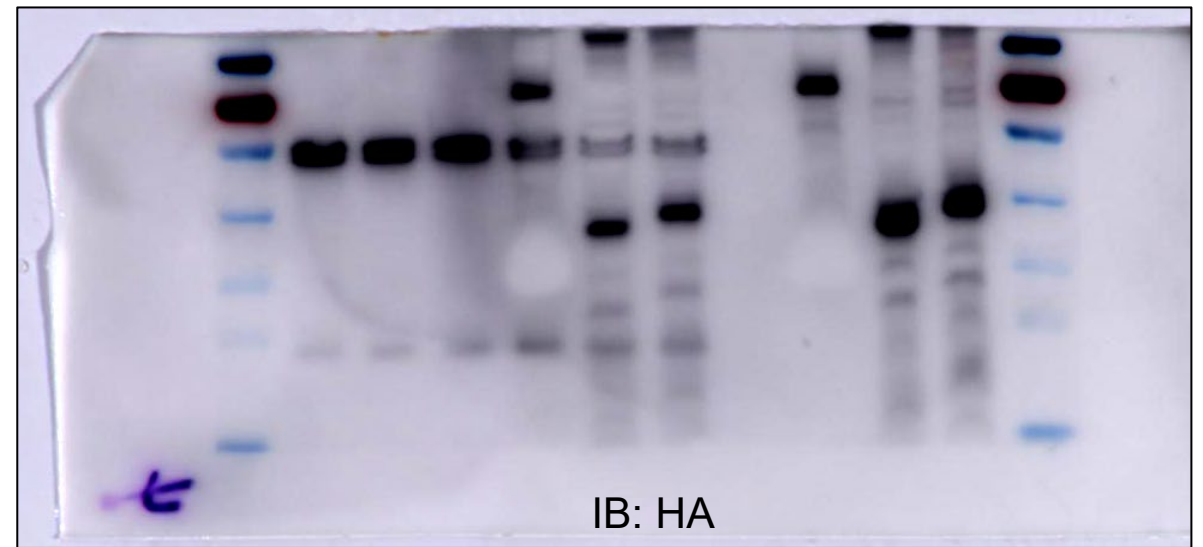

Fig. 7c

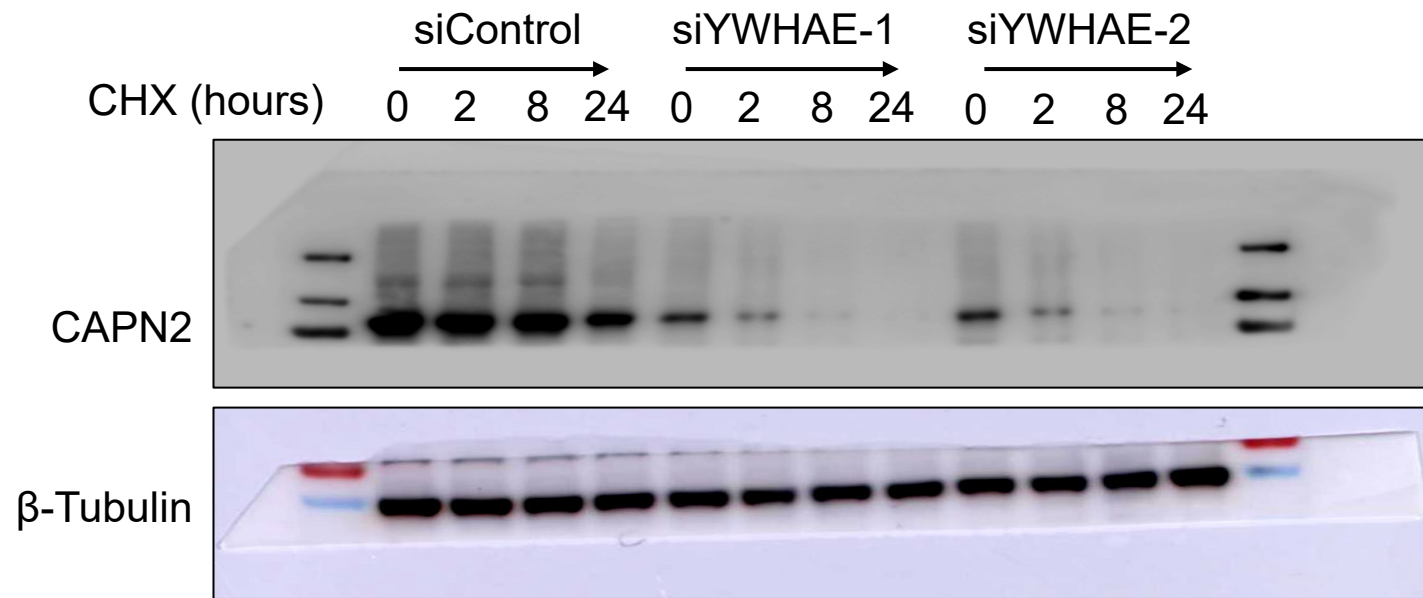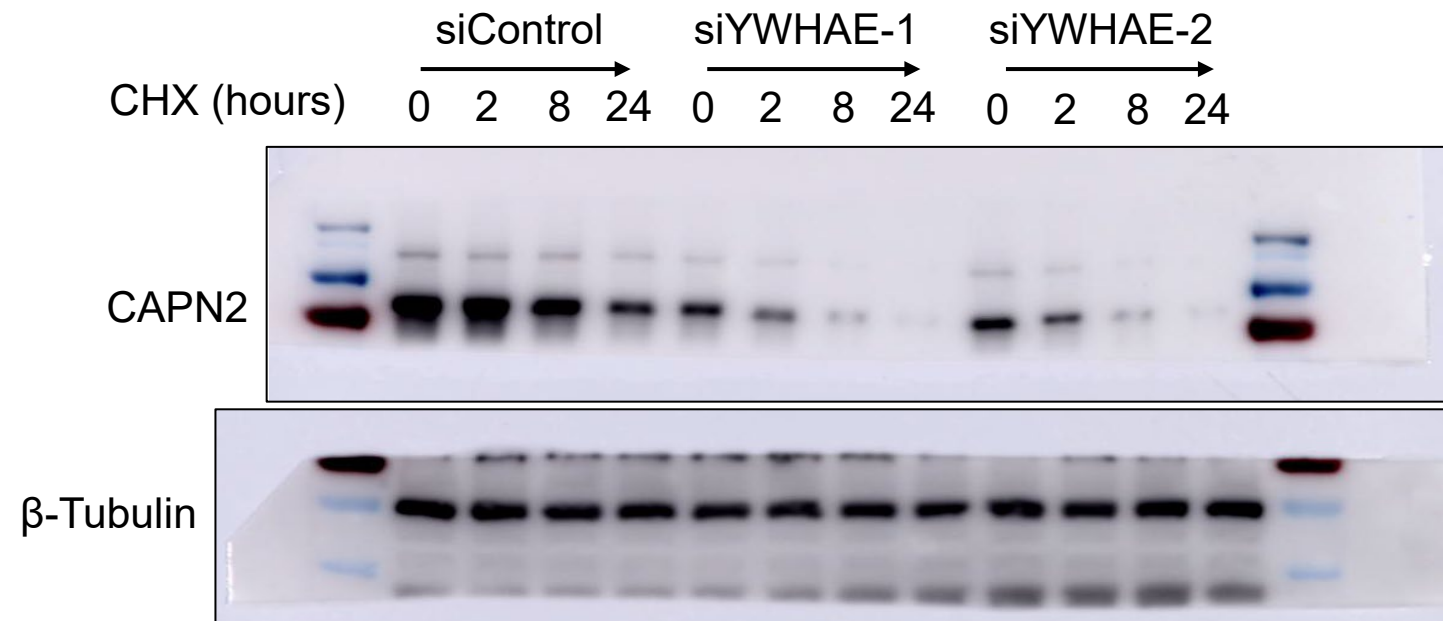

Fig. 7d

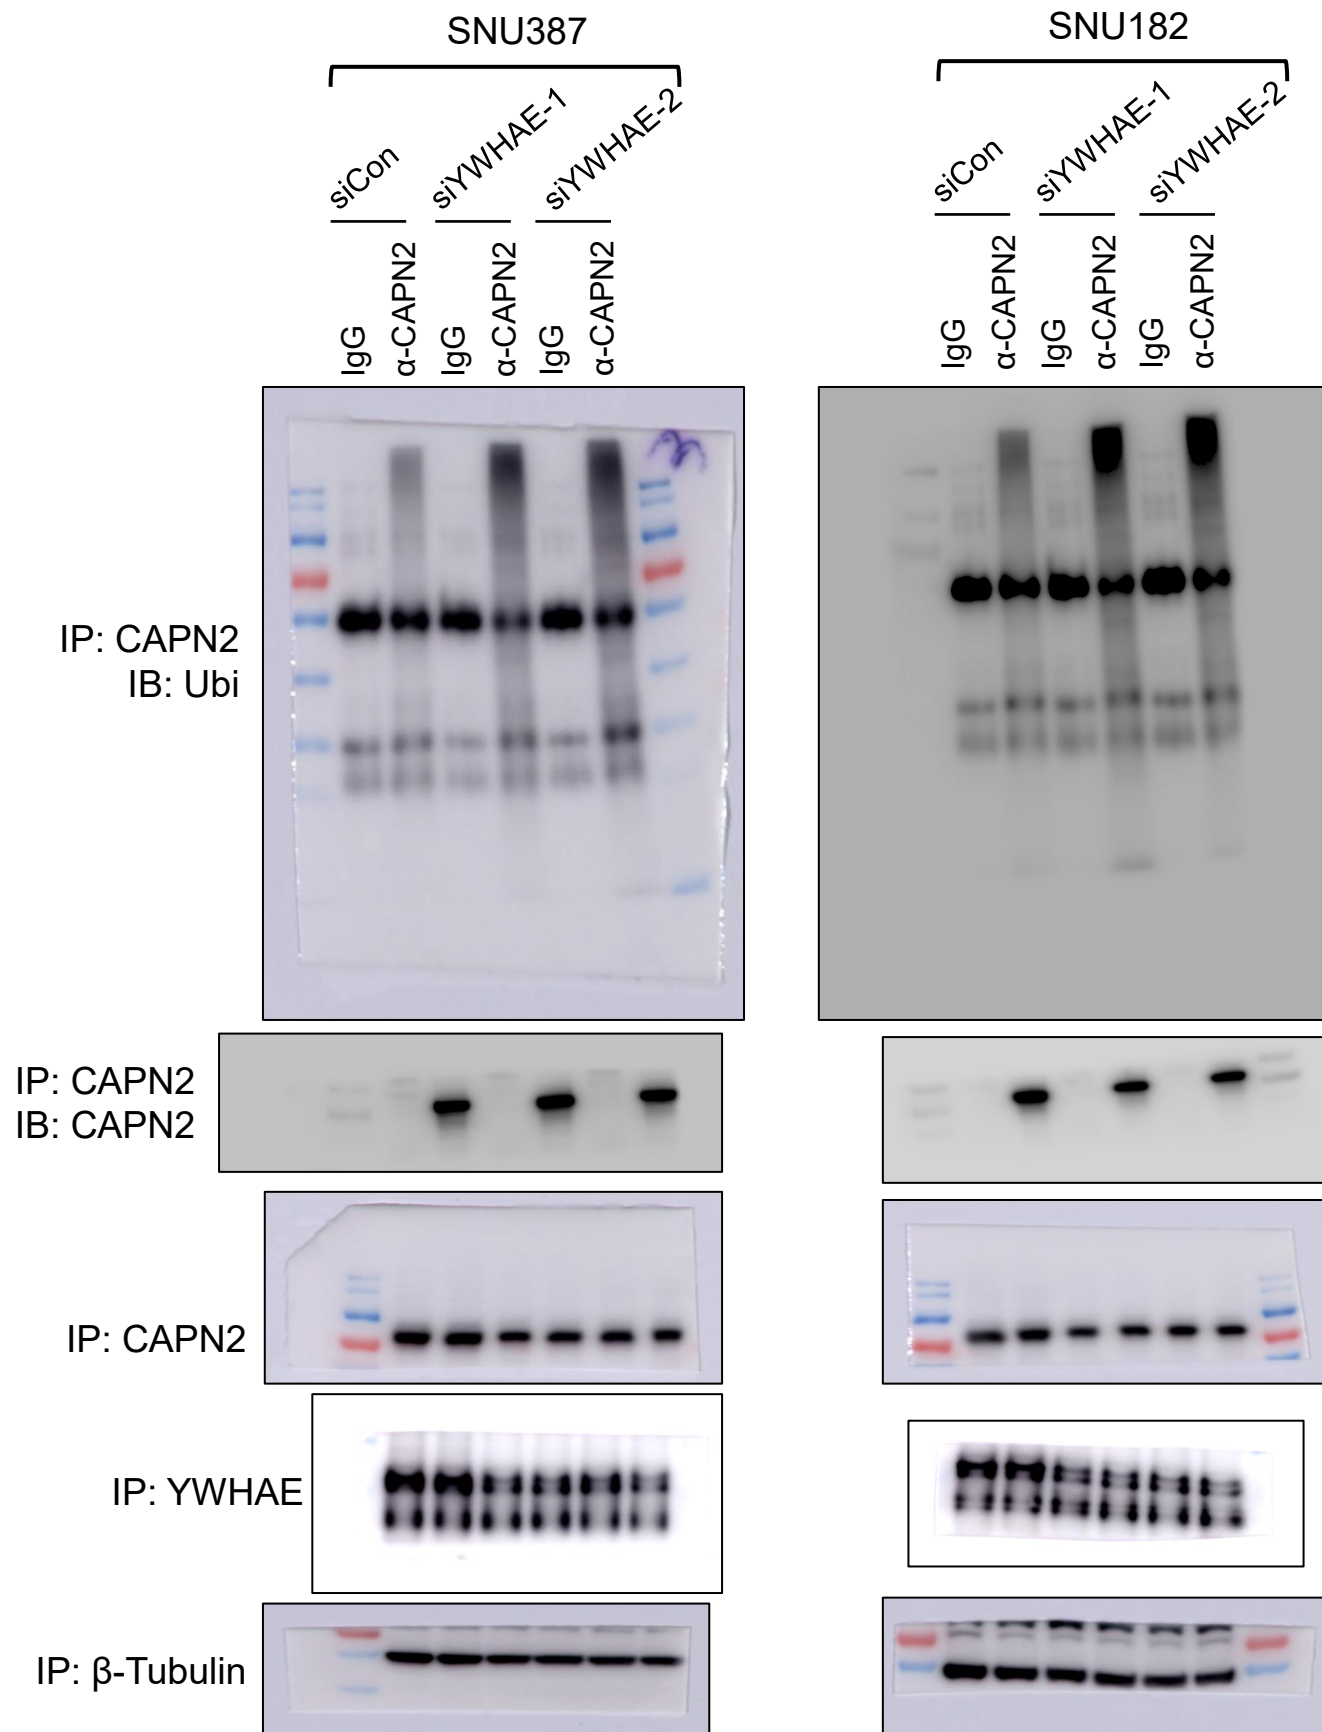

Fig. 7f

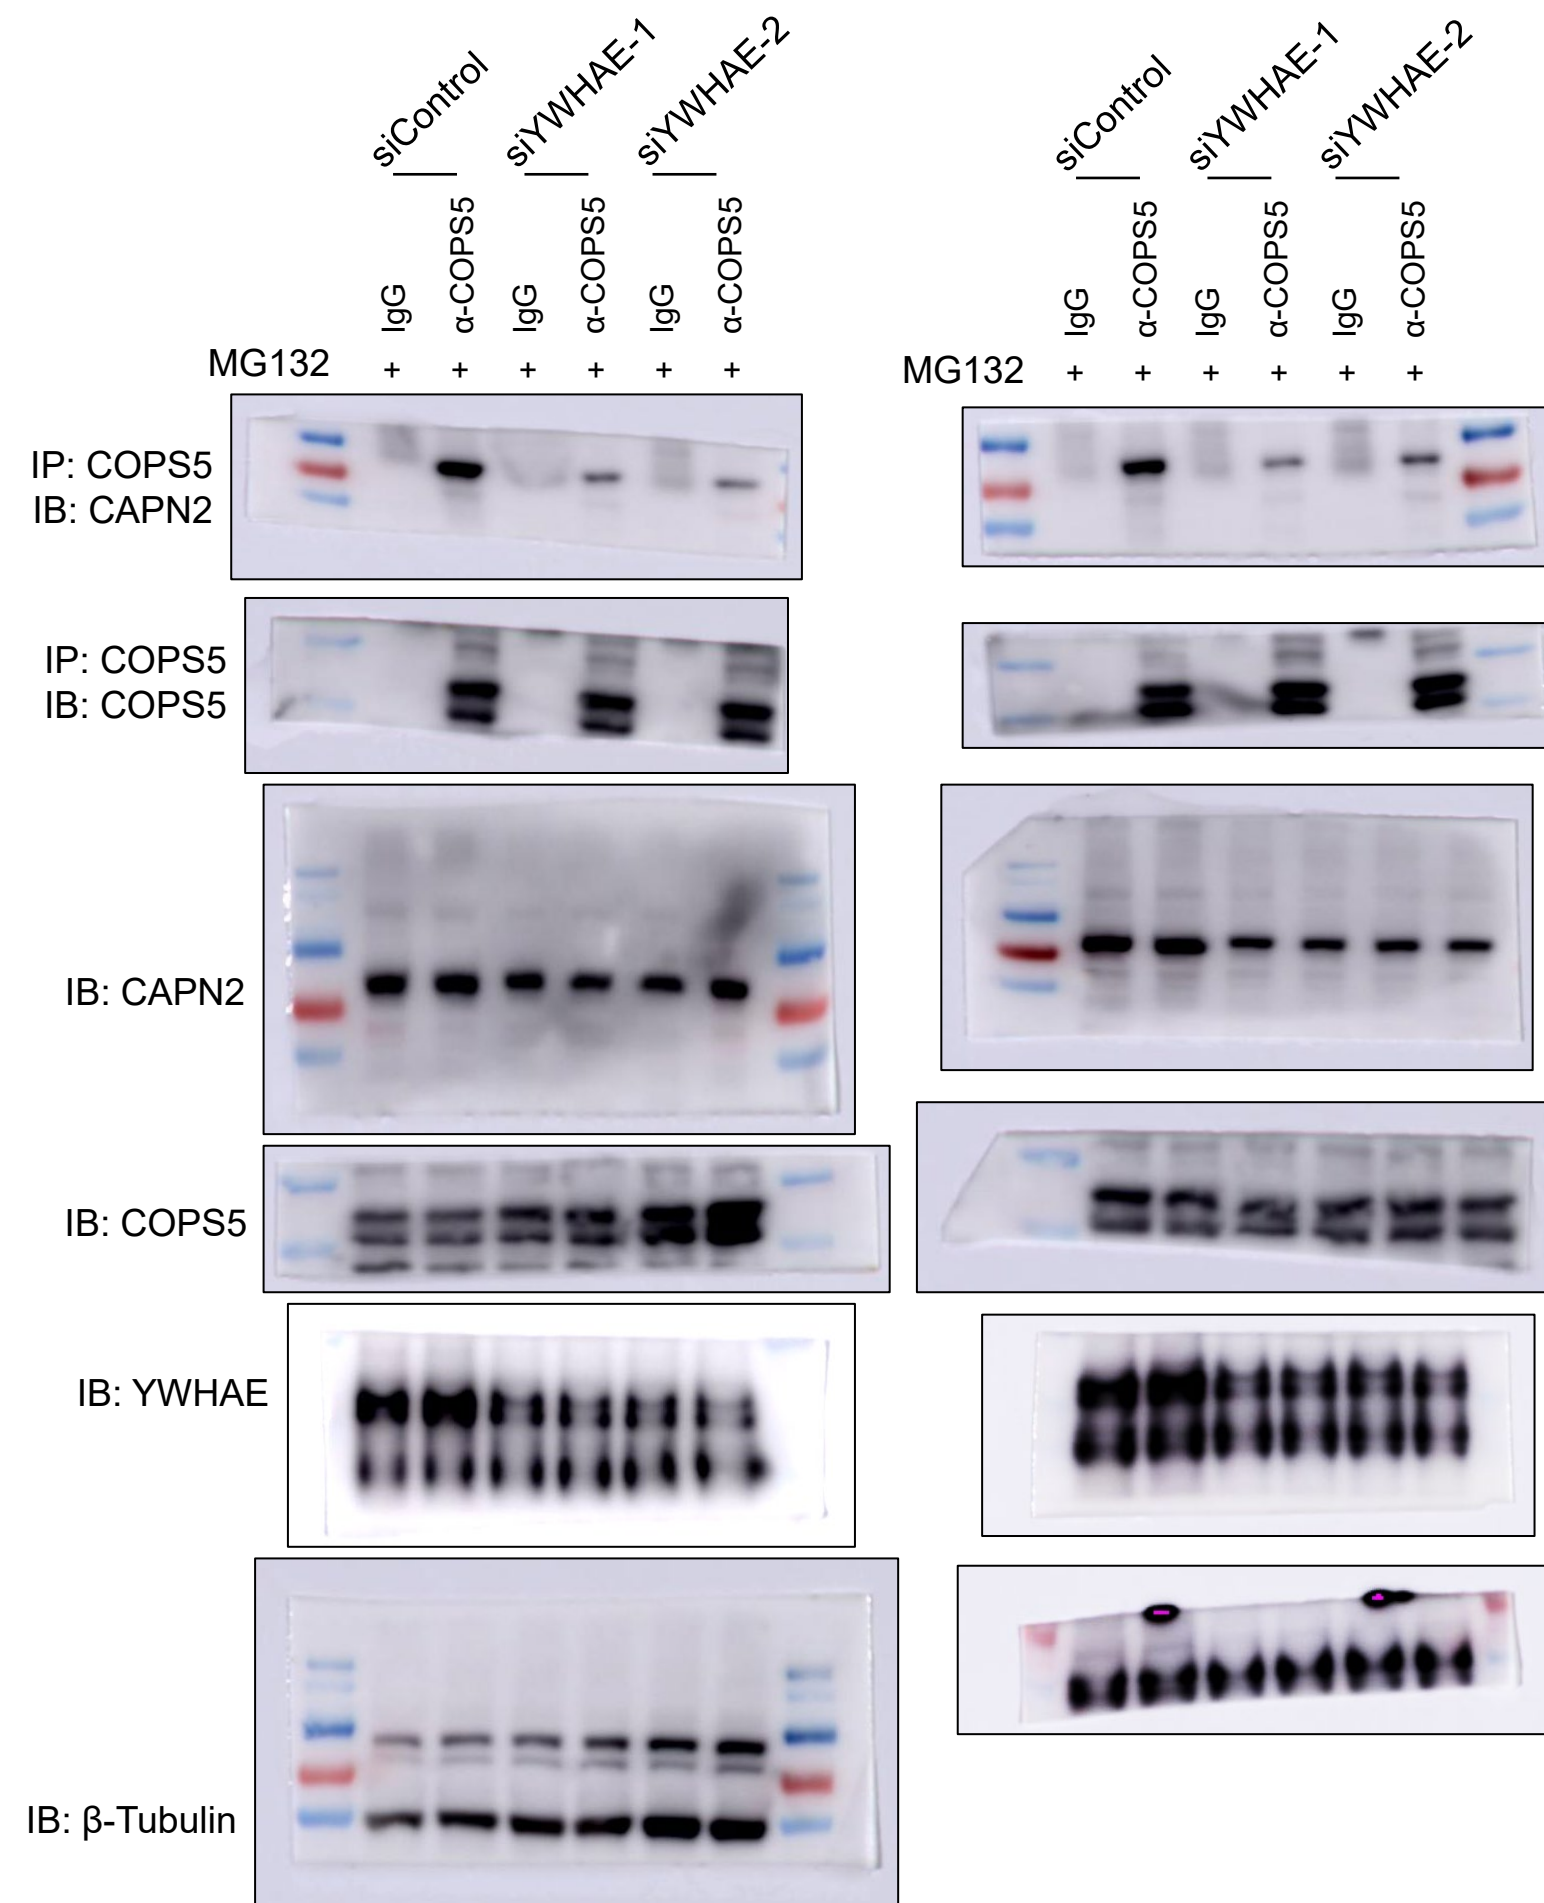

Fig. 7g

Fig. 7h

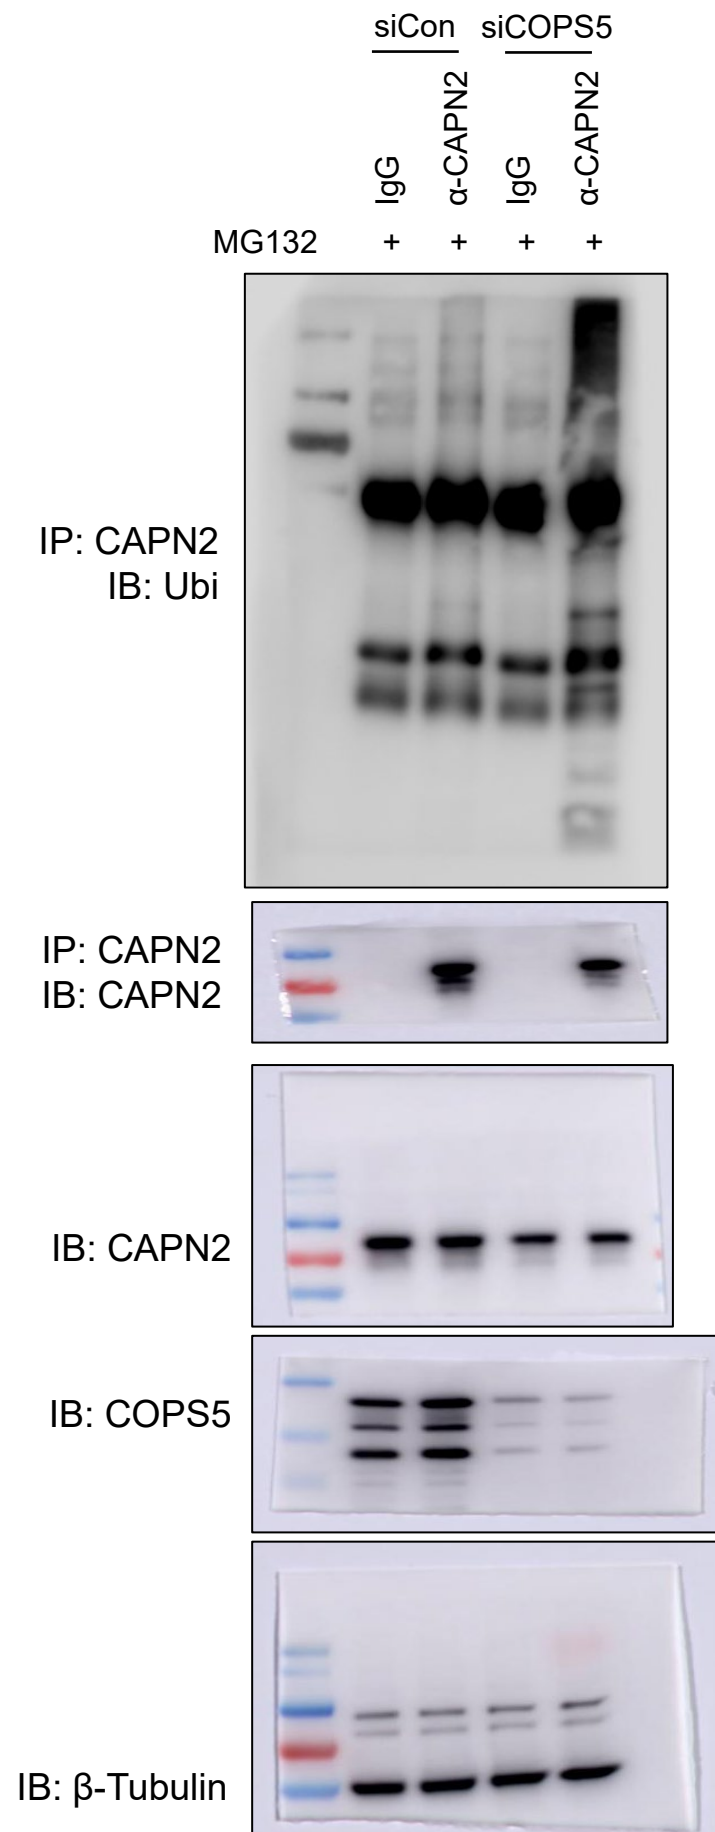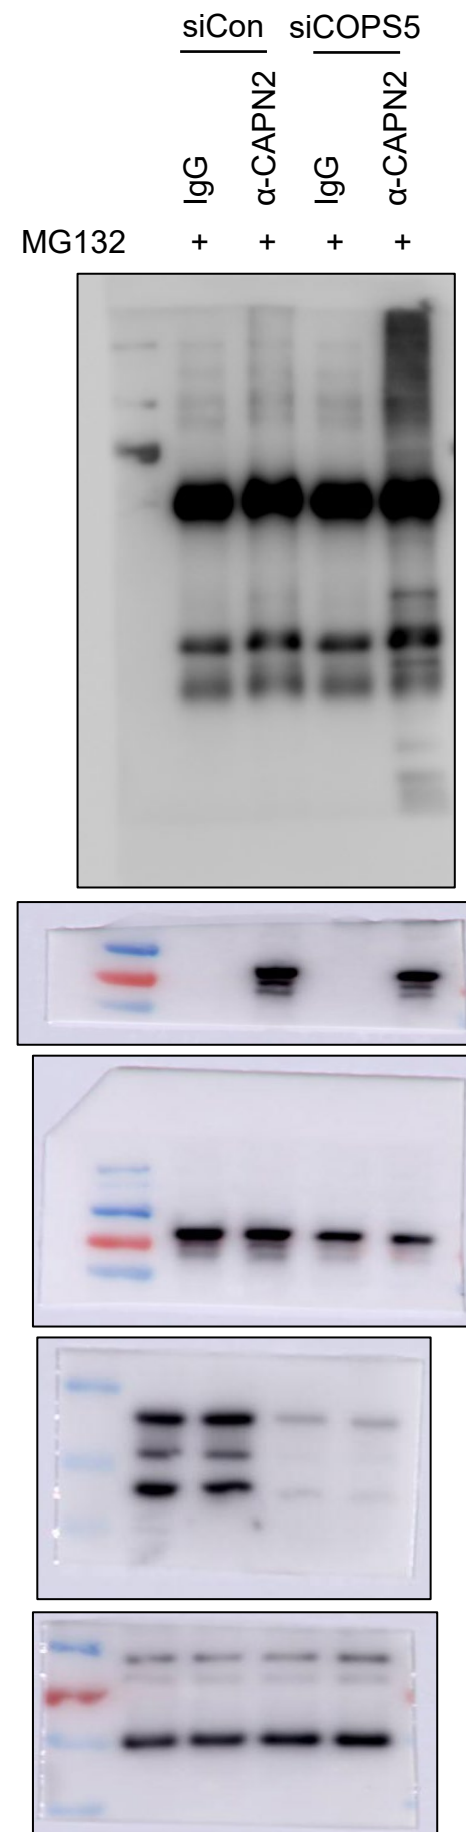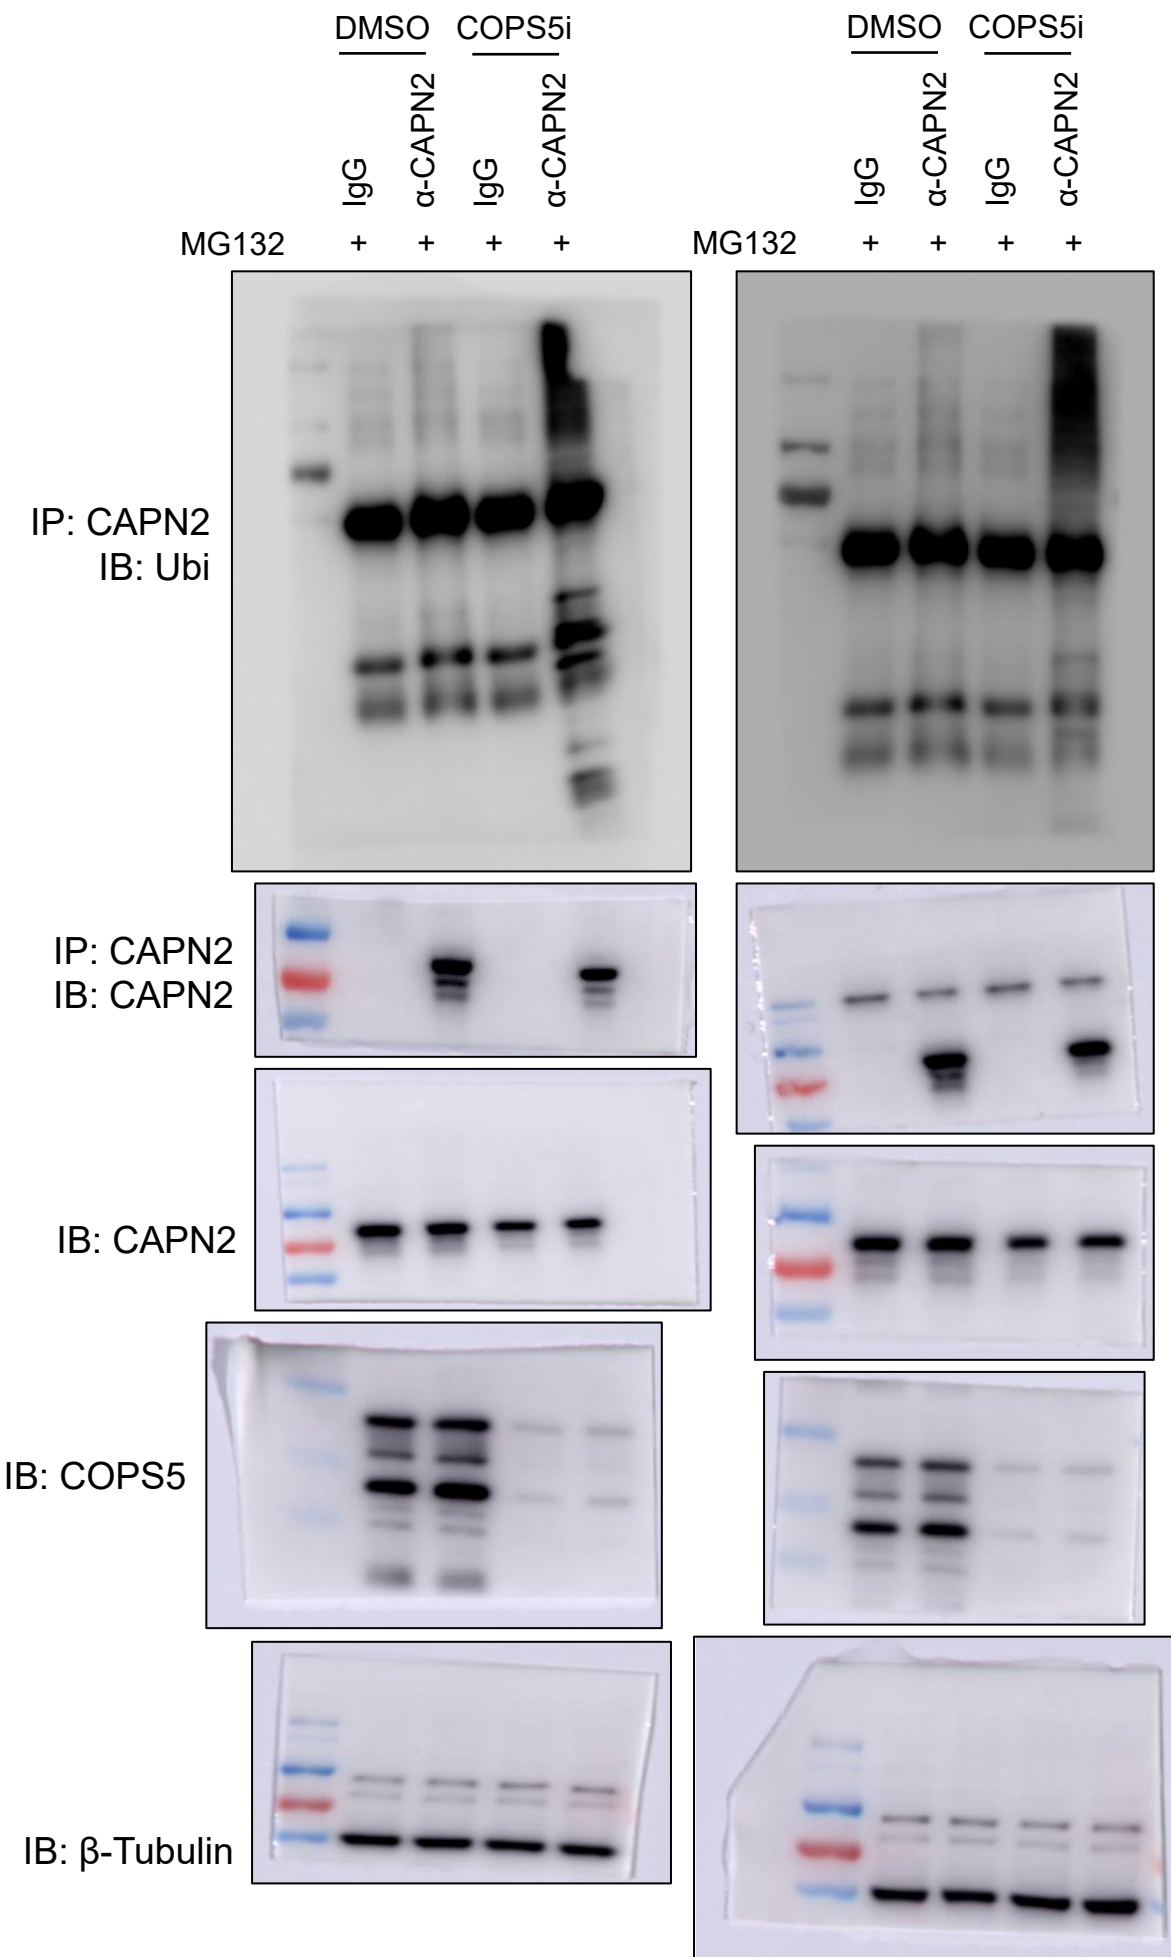

Supplement: 43556_2024_242_MOESM2_ESM.pdf [file 43556_2024_242_MOESM2_ESM.pdf]
